# Supplementary material for: Association and Linkage Analysis of Aluminum Tolerance Genes in Maize
Source: PubMed Central journal article supplement (PMC2848604; doi:10.1371/journal.pone.0009958), 2010-04-01
Supplement: pone.0009958.s001.pdf [file pone.0009958.s001.pdf]

| TAXA     | Lsmean-control | Lsmean-AI treatment |
|----------|----------------|---------------------|
| 811      | 36.38          | 34.22               |
| 3316     | .              | 16.42               |
| 3811     | 47.5           | 27.7                |
| 4226     | 23.5           | 28.8                |
| 4722     | .              | 3.67                |
| A188     | 29.67          | 60.3                |
| A214N    | 23.17          | 18.1                |
| A239     | 47.67          | 42                  |
| A272     | .              | 31.92               |
| A4415    | .              | 31.92               |
| A554     | 66.83          | 36.8                |
| A556     | 30             | 28.7                |
| A6       | 32.88          | 27.53               |
| A619     | 51.33          | 39.6                |
| A632     | 32.17          | 29.2                |
| A634     | 46             | 43.9                |
| A635     | 48.88          | 24.37               |
| A641     | 47.33          | 36.7                |
| A654     | 64.33          | 48.3                |
| A659     | 63             | 77.4                |
| A661     | 61.67          | 50                  |
| A679     | 44.83          | 24.1                |
| A680     | 35             | 35.3                |
| A682     | 53.63          | 43.07               |
| AB28A    | 50.5           | 33.4                |
| B10      | .              | 53.7                |
| B103     | 62.33          | 45                  |
| B104     | 67.33          | 46.1                |
| B105     | 60.17          | 35.9                |
| B109     | 50.5           | 30.2                |
| B115     | 52.4           | 48.62               |
| B14A     | 40.88          | 31.2                |
| B164     | 56.17          | 23.5                |
| B2       | .              | 35.65               |
| B37      | 51.17          | 41.33               |
| B46      | 47.88          | 24.7                |
| B52      | .              | 11.92               |
| B57      | 39.17          | 37.6                |
| B64      | 33.38          | 39.7                |
| B68      | 28             | 25                  |
| B73      | 34.67          | 31.5                |
| B73HTRHM | 43.17          | 40.4                |
| B75      | 48.17          | 54                  |
| B76      | 44             | 41.3                |
| B77      | 33.33          | 41.1                |
| B79      | 59.4           | 36.78               |
| B84      | 44.17          | 27.7                |
| B97      | 63             | 17.6                |
| C103     | 50.67          | 27.2                |
| C123     | 51             | 33                  |
| C164     | .              | 26.2                |
| C49      | 38             | 28                  |
| CH70130  | 69.67          | 53.3                |
| CH9      | 59.17          | 48.6                |
| CI1872   | 41.33          | 29.7                |
| CI21E    | 39.33          | 38.1                |
| CI28A    | 62.17          | 47                  |

|         |       |       |
|---------|-------|-------|
| CI31A   | 24.33 | 27.1  |
| CI3A    | 34.5  | 32.9  |
| CI44    | 30    | 21.05 |
| CI64    | 33.83 | 23.45 |
| CI66    | 34.67 | 41.1  |
| CI7     | .     | 31.15 |
| CI90C   | 58.67 | 24.1  |
| CI91B   | 78.5  | 60.55 |
| CM105   | 32.67 | 35.7  |
| CM174   | 36.9  | 46.28 |
| CM37    | 42.5  | 48.88 |
| CM7     | 32.67 | 34    |
| CML10   | 65.4  | 62.85 |
| CML103  | 62.4  | 54.28 |
| CML108  | 54.5  | 43.3  |
| CML11   | 66.5  | 67.6  |
| CML14   | 47.5  | 24    |
| CML154Q | 70.33 | 22.4  |
| CML157Q | 47.33 | 50.1  |
| CML158Q | 55    | 48    |
| CML218  | 50.67 | 37.5  |
| CML220  | 50.17 | 31.1  |
| CML227  | .     | 40.7  |
| CML228  | 51    | 26.7  |
| CML238  | 39.33 | 41.5  |
| CML247  | 47.63 | 37.95 |
| CML254  | .     | 44.67 |
| CML258  | 34.83 | 21.4  |
| CML261  | 58.33 | 29.88 |
| CML277  | 64.33 | 39.2  |
| CML281  | .     | 15.15 |
| CML287  | 26.33 | 28    |
| CML311  | .     | 10.42 |
| CML314  | 59.67 | 50.4  |
| CML321  | 49.13 | 27.45 |
| CML322  | .     | 19.42 |
| CML323  | 25.17 | 30.8  |
| CML328  | 56.33 | 23.4  |
| CML331  | .     | 36.65 |
| CML332  | 64.5  | 34.9  |
| CML333  | 51.67 | 43.9  |
| CML341  | 66.5  | 46    |
| CML38   | 49.88 | 37.07 |
| CML45   | 52.5  | 43.7  |
| CML5    | .     | 37.92 |
| CML52   | 37    | 23.5  |
| CML61   | .     | 27.15 |
| CML69   | 59.33 | 51.9  |
| CML77   | 60.67 | 39.8  |
| CML91   | 47.67 | 37    |
| CML92   | 75.17 | 36.8  |
| CMV3    | 42    | 37.4  |
| CO106   | .     | 21.92 |
| CO125   | 39.5  | 27.95 |
| CO255   | 48.83 | 39.7  |
| D940Y   | 73.5  | 37.2  |
| DE1     | 64.33 | 41    |
| DE2     | 58.33 | 43.1  |

|          |       |       |
|----------|-------|-------|
| DE3      | 59.17 | 42.7  |
| DE811    | 56    | 43.8  |
| E2558W   | 57.33 | 47.2  |
| EP1      | 48.33 | 37.05 |
| F2       | 35.33 | 35.72 |
| F2834T   | 63    | 49.3  |
| F44      | 79.5  | 52.8  |
| F6       | 59.67 | 49.2  |
| F7       | 45.5  | 37.8  |
| GA209    | 39.33 | 27.9  |
| GT112    | 46.9  | 20.45 |
| H100     | 50.4  | 23.5  |
| H105W    | 37.4  | 15.45 |
| H49      | 68.17 | 45.1  |
| H84      | 44.67 | 45    |
| H91      | 51.17 | 36.6  |
| H95      | 49.4  | 26.95 |
| H99      | 54.5  | 32.4  |
| Hi27     | 63.33 | 37.1  |
| HP301    | 44.9  | 34.78 |
| Hy       | 38.4  | 37.28 |
| I137TN   | 38.5  | 40.05 |
| I205     | .     | 24.67 |
| I-29     | 44.83 | 28    |
| IA2132   | 55.83 | 24.3  |
| Ia5125   | 33.83 | 35.95 |
| IDS28    | 54    | 51.2  |
| IDS69    | 59.4  | 36.62 |
| IDS91    | 54.33 | 45    |
| IL101    | 56.67 | 48.1  |
| IL14H    | 56.83 | 42.8  |
| IL677A   | 39.17 | 40.3  |
| K148     | 57    | 43.9  |
| K4       | 38.83 | 35.6  |
| K55      | 56.63 | 37.2  |
| K64      | 52.38 | 41.2  |
| Ki11     | 38.17 | 34.4  |
| Ki14     | 52.67 | 42.5  |
| Ki2021   | 61.13 | 47.57 |
| Ki21     | 35    | 37.2  |
| Ki3      | 51.67 | 28.55 |
| Ki43     | 42.33 | 30.8  |
| Ki44     | 49.5  | 40.4  |
| KY21     | 63    | 58    |
| Ky226    | .     | 24.92 |
| Ky228    | .     | 38.17 |
| L317     | 65.5  | 55.45 |
| L578     | 61    | 44.3  |
| M14      | 48.5  | 31.3  |
| M162W    | 18.4  | 52.78 |
| M37W     | 39.33 | 41.1  |
| MEF15655 | 57.83 | 34.08 |
| MO17     | 44.67 | 27.7  |
| MO18W    | 29.5  | 23    |
| MO1W     | 43.5  | 38.5  |
| MO24W    | 54.33 | 42.5  |
| MO44     | 58.33 | 34.9  |
| MO45     | 46.67 | 33.4  |

|        |       |       |
|--------|-------|-------|
| MO46   | 52.67 | 26.7  |
| MO47   | 58.5  | 35.9  |
| MOG    | 44.13 | 54.07 |
| MP339  | 38.5  | 57    |
| MS1334 | 41    | 39.3  |
| MS153  | 46.33 | 27.4  |
| MS71   | 48.67 | 48.1  |
| MT42   | 43.33 | 50.1  |
| N192   | 44.33 | 51.5  |
| N28HT  | 50.33 | 37    |
| N6     | 45.83 | 46.21 |
| N7A    | 51.17 | 32.2  |
| NC222  | 46.67 | 46.3  |
| NC230  | 54.83 | 40.3  |
| NC232  | 62.67 | 50.1  |
| NC236  | 58.83 | 49.5  |
| NC238  | 64.17 | 63.8  |
| NC250  | 38.5  | 30.3  |
| NC258  | 48.83 | 59.2  |
| NC260  | 42.83 | 25    |
| NC262  | 48.67 | 37.6  |
| NC264  | 65    | 63.3  |
| NC268  | 33.17 | 26.88 |
| NC290A | 41.33 | 49.1  |
| NC292  | 51.5  | 32.72 |
| NC294  | 46.83 | 36.8  |
| NC296  | 56    | 27.4  |
| NC296A | 54.38 | 24.71 |
| NC298  | 42.5  | 22.6  |
| NC300  | 50    | 29.8  |
| NC302  | 46.17 | 30    |
| NC306  | 18.4  | 32.95 |
| NC308  | 38.5  | 35.22 |
| NC310  | 50    | 38.2  |
| NC312  | 44    | 31.88 |
| NC316  | 42    | 33.2  |
| NC318  | 53.5  | 59    |
| NC320  | 69.67 | 67.1  |
| NC322  | 55.17 | 59.55 |
| NC324  | 44.83 | 28.6  |
| NC326  | 51    | 37.2  |
| NC328  | 43.33 | 38.7  |
| NC33   | 52.83 | 26.59 |
| NC330  | 54.33 | 35.55 |
| NC332  | 61.5  | 59.55 |
| NC334  | 63.5  | 62.22 |
| NC336  | 32.4  | 24.6  |
| NC338  | 21.5  | 32.9  |
| NC340  | 51.4  | 30.12 |
| NC342  | 49.5  | 44.7  |
| NC344  | 57.4  | 60.08 |
| NC346  | 52.5  | 27.5  |
| NC348  | 40.4  | 37.28 |
| NC350  | 44.4  | 26.78 |
| NC352  | 31.4  | 12.58 |
| NC354  | 49    | 25.6  |
| NC356  | 39.83 | 26.8  |
| NC358  | 51.83 | 32.8  |

|        |       |       |
|--------|-------|-------|
| NC360  | 43.83 | 33.7  |
| NC362  | 45.33 | 42.9  |
| NC364  | 58.33 | 48.4  |
| NC366  | 60    | 57.7  |
| NC368  | 61.83 | 41.7  |
| NC370  | 74.5  | 64.38 |
| NC372  | 52    | 37.05 |
| ND246  | 63.33 | 38.8  |
| Oh40B  | 45.38 | 24.57 |
| OH43   | 56.4  | 15.1  |
| OH43E  | 48.4  | 18.45 |
| OH603  | 36.17 | 23.8  |
| OH7B   | 55.67 | 18    |
| OS420  | 46    | 31.1  |
| P39    | 50.67 | 26.4  |
| PA762  | 52.4  | 18.95 |
| PA875  | 58.17 | 71.2  |
| PA880  | 60.67 | 38.4  |
| PA91   | 66.17 | 41.2  |
| Q6199  | 41.9  | 24.5  |
| R168   | 54.33 | 41.6  |
| R177   | 39    | 27.2  |
| R229   | 43.38 | 34.07 |
| R4     | 59    | 52    |
| SA24   | 62.83 | 41    |
| SC213R | 62.17 | 53.1  |
| SC357  | 49.83 | 53.6  |
| SC55   | 47.33 | 37.3  |
| SD40   | 58    | 20.1  |
| SD44   | 68    | 37.8  |
| Sg1533 | 37.33 | 28.2  |
| SG18   | 39.67 | 30.6  |
| T232   | 47.63 | 34.82 |
| T234   | 47.83 | 32.1  |
| T8     | 66.5  | 59.4  |
| TX303  | 73.5  | 37.2  |
| TX601  | 53.5  | 38    |
| TZi10  | 46    | 26.5  |
| TZi11  | 58.5  | 60.8  |
| TZi16  | 56.17 | 52.2  |
| TZi18  | 52.83 | 30.2  |
| TZi25  | 52.67 | 37.8  |
| TZi8   | 71.38 | 67.57 |
| TZi9   | 57    | 41.4  |
| U267Y  | 45.38 | 36.07 |
| VA102  | 44.33 | 48.4  |
| VA14   | 56.5  | 49.3  |
| VA17   | 54.5  | 48.1  |
| VA22   | 63    | 56.6  |
| VA26   | .     | 46.92 |
| VA35   | 84.63 | 55.82 |
| VA59   | 65.83 | 35.9  |
| VA85   | 34    | 33.95 |
| VA99   | 54.67 | 50.9  |
| VAW6   | 59    | 39    |
| W117HT | 55.83 | 38.6  |
| W401   | 70.4  | 46.62 |
| W64A   | 47.33 | 39.9  |

|         |       |      |
|---------|-------|------|
| WD      | 38.83 | 33.2 |
| WF9     | 52.83 | 47   |
| Yu796NS | 49    | 39.9 |
