# Supplementary material for: Association and Linkage Analysis of Aluminum Tolerance Genes in Maize
Source: PubMed Central journal article supplement (PMC2848604; doi:10.1371/journal.pone.0009958), 2010-04-01
Supplement: pone.0009958.s002.pdf [file pone.0009958.s002.pdf]

|         |   |   |   |   |   |   |   |   |   |   |   |
|---------|---|---|---|---|---|---|---|---|---|---|---|
| CI28A   | C | G | 2 | A | A | G | A | G | G | C | C |
| CI31A   | C | G | 0 | A | A | G | G | A | G | C | T |
| CI3A    | T | A | 2 | C | C | A | G | G | G | C | G |
| CI64    | T | A | 2 | C | C | A | G | G | G | C | G |
| CI66    | N | N | N | N | N | N | N | N | N | N | N |
| CI90C   | C | G | 0 | A | A | G | G | A | N | N | N |
| CI91B   | C | G | 2 | A | A | G | G | T | G | C | N |
| CM105   | C | G | 0 | A | A | G | G | A | A | C | G |
| CM174   | C | G | 0 | A | A | G | G | A | A | C | T |
| CM37    | N | N | N | N | N | N | N | N | N | N | N |
| CM7     | C | G | 0 | A | A | G | G | A | A | C | T |
| CML10   | N | N | N | N | N | N | N | N | N | N | N |
| CML103  | N | N | N | N | N | N | N | N | N | N | N |
| CML108  | C | G | 2 | A | A | G | G | T | N | C | N |
| CML11   | N | N | N | N | N | N | N | N | N | N | N |
| CML14   | C | G | 0 | A | A | G | G | A | A | C | T |
| CML154Q | C | G | 2 | A | A | G | G | A | G | C | C |
| CML157Q | T | A | 2 | C | C | A | G | G | G | C | C |
| CML158Q | C | G | 0 | A | A | G | G | A | A | C | C |
| CML218  | N | N | N | N | N | N | N | N | N | N | N |
| CML220  | C | G | 0 | A | A | G | G | A | A | C | T |
| CML227  |   |   |   |   |   |   |   |   |   |   |   |
| CML228  | N | N | N | N | N | N | N | N | N | N | N |
| CML238  | C | G | 0 | A | A | G | G | A | A | C | T |
| CML247  | N | N | N | N | N | N | N | N | N | N | N |
| CML254  | C | G | 0 | A | A | G | G | A | A | C | T |
| CML258  | N | N | N | N | N | N | N | N | N | N | N |
| CML261  | C | G | 0 | A | A | G | G | A | A | C | T |
| CML264  | C | G | 0 | A | A | G | G | A | A | C | T |
| CML277  | C | G | 0 | A | A | G | G | A | A | C | T |
| CML281  | N | N | N | N | N | N | N | N | N | N | N |
| CML287  | C | G | 0 | A | A | G | G | A | A | C | T |
| CML311  | C | G | 0 | A | A | G | G | A | A | C | T |
| CML314  | C | G | 2 | A | A | G | G | A | G | C | C |
| CML321  | T | A | 2 | C | C | A | G | G | G | C | C |
| CML322  | C | G | 2 | A | A | G | G | A | G | C | C |
| CML323  | N | N | N | N | N | N | N | N | N | N | N |
| CML328  | C | G | 2 | A | A | G | G | A | G | C | C |
| CML331  | N | N | N | N | N | N | N | N | N | N | N |
| CML332  | N | N | N | N | N | N | N | N | N | N | N |
| CML333  | C | G | 0 | A | A | G | G | A | A | C | T |
| CML341  | N | N | N | N | N | N | N | N | N | N | N |
| CML38   | N | N | N | N | N | N | N | N | N | N | N |
| CML45   | C | G | 0 | A | A | G | G | A | A | C | T |
| CML5    | N | N | N | N | N | N | N | N | N | N | N |
| CML52   | N | N | N | N | N | N | N | N | N | N | N |
| CML61   | N | N | N | N | N | N | N | N | N | N | N |
| CML69   | C | G | 0 | A | A | G | G | A | A | C | T |
| CML77   | N | N | N | N | N | N | N | N | N | N | N |
| CML91   | N | N | N | N | N | N | N | N | N | N | N |
| CML92   | N | N | N | N | N | N | N | N | N | N | N |
| CMV3    | T | A | 2 | C | C | A | G | G | G | C | C |
| CO106   | N | N | N | N | N | N | N | N | N | N | N |
| CO125   | C | G | 0 | A | A | G | G | A | A | C | T |
| CO255   | C | G | 2 | A | A | G | G | A | A | C | T |
| D940Y   | N | N | N | N | N | N | N | N | N | N | N |
| DE1     | C | G | 2 | A | A | G | G | A | A | C | T |





|         |   |   |   |   |   |   |   |   |   |   |   |
|---------|---|---|---|---|---|---|---|---|---|---|---|
| OH40B   | C | G | 2 | A | A | A | G | G | G | T | G |
| OH43    | N | N | N | N | C | A | G | G | G | C | G |
| OH43E   | C | G | 2 | A | A | A | N | A | N | C | C |
| OH603   | N | N | N | N | A | N | G | A | N | N | C |
| OH7B    | C | G | 2 | A | A | A | A | A | N | C | C |
| Os420   | C | G | 2 | A | A | A | G | G | G | C | C |
| P39     | C | G | 2 | A | A | A | G | T | G | C | C |
| PA762   | C | G | 2 | A | A | A | A | G | N | T | G |
| PA875   | N | N | N | N | N | N | N | N | N | N | N |
| PA880   | N | N | N | N | N | N | N | N | N | N | N |
| PA91    | C | G | 2 | A | A | A | N | A | N | C | N |
| Q6199   | N | N | N | N | N | N | N | N | N | N | C |
| R168    | C | G | 2 | A | A | A | G | A | G | C | C |
| R177    | T | A | 2 | C | C | A | A | G | G | C | C |
| R229    | T | A | 2 | C | C | A | A | G | G | C | C |
| R4      | T | A | 2 | C | C | A | A | G | G | C | C |
| SA24    | N | N | N | N | N | N | N | N | N | N | N |
| SC213R  | N | N | N | N | N | N | N | N | N | N | N |
| SC357   | C | G | 0 | A | A | A | N | G | A | N | C |
| SC55    | N | N | N | N | N | N | N | N | N | N | N |
| SD40    | C | G | 2 | A | A | A | G | A | T | C | C |
| SD44    | C | G | 2 | A | A | A | G | A | G | C | C |
| SG1533  | C | G | 0 | A | A | A | G | A | A | N | C |
| SG18    | C | G | 0 | A | A | A | G | A | A | C | C |
| T232    | C | G | 0 | A | A | A | N | G | A | C | C |
| T234    | N | N | N | N | N | N | N | N | N | N | N |
| T8      | N | N | N | N | N | N | N | N | N | N | N |
| Tx303   | N | N | N | N | N | N | N | N | N | N | N |
| TX601   | N | N | N | N | N | N | N | N | N | N | N |
| TZI10   | N | N | N | N | N | N | N | N | N | N | N |
| TZI11   | N | N | N | N | N | N | N | N | N | N | N |
| TZI16   | T | A | 2 | C | C | A | N | G | N | C | N |
| TZI18   | N | N | N | N | N | N | N | N | N | N | N |
| TZI25   | C | G | 0 | A | A | A | G | A | A | C | C |
| TZI8    | C | G | 2 | A | A | A | N | G | A | C | C |
| TZI9    | N | N | N | N | N | N | N | N | N | N | N |
| U267Y   | C | G | 2 | A | A | A | G | A | G | C | C |
| VA102   | C | G | 2 | A | A | A | G | A | G | C | C |
| VA14    | N | G | 2 | A | A | A | G | A | G | N | C |
| VA17    | C | G | 2 | A | A | A | G | A | G | C | C |
| VA22    | C | G | 2 | A | A | A | G | A | G | C | C |
| VA26    | T | A | 2 | C | C | A | N | G | N | C | C |
| VA35    | N | N | N | N | N | N | N | N | N | N | N |
| VA59    | C | G | 2 | A | A | A | G | A | G | C | C |
| VA85    | T | A | 2 | C | C | A | N | G | G | C | C |
| VA99    | C | G | 2 | A | A | A | N | A | G | C | C |
| VAW6    | N | N | N | N | N | N | N | N | N | N | N |
| W117HT  | C | G | 2 | A | A | A | N | A | N | C | N |
| W153R   | N | N | N | N | N | N | N | N | N | N | N |
| W182B   | T | A | 2 | C | C | A | A | G | G | C | C |
| W22     | T | A | 2 | C | C | A | A | G | G | C | C |
| W22R    | T | A | 2 | C | C | A | A | G | G | C | C |
| W64A    | C | G | 2 | A | A | A | G | A | G | C | C |
| WD      | T | A | 2 | C | C | A | A | G | G | C | C |
| WF9     | C | G | 2 | A | A | A | G | A | G | C | C |
| YU796NS | C | G | 2 | A | A | A | G | A | G | C | C |



1 0 0 0 N N N 1 0 0 N 0 N N N 1 N 0 1 0 0 N 1 N 1 N N N N 0 0 0 0 1 0 1 N N 1 N 0 N N 0 N N 0 N N 0 N N 0 N 0 0 0 0 1 N 1

T T A A N N T T T T N T N T N T T T A T N T N T N N N T T T T T T N T N T N T N N T N N A N T T C N T

1 1 2 2 N N N 1 1 1 1 N 1 N N 1 N 1 1 2 1 N 1 N 1 N N N N 1 1 1 N 1 0 1 N 1 N N 1 N 1 N N N 1 N N N N 2 N 1 2 N 1

T C C C N N N C C C N C N C N C N C T C C N C N C N N N C C C N C C N C C N C N C N C N T

T T G G N N T T T T N T N T N T T T G T N T N T N N N T T T T N T N T N T N N T N N N G N T A N T

T G G G N N N G G G N N G N N G N N G T G G N G N G N N N N G G N G N N N G N N N G N N N G N G N T

C C T T N N C C C N C N C N C C T C C N C N C N N N C C C N C N C N C N C N C N C N C N C N T N C T N C

G G G G N N N G G G N N G N N G N N G G G G N G N G N N N G N N N G N N N G N N N G N G N G N G

C T C C N N N C T T T N T N N C N N T C C N N T N T N N N T T T N N T N N T N N N T N N N C N T C N N N

G G G G N N N G G G N N G N N G N N G N N G N N G N N G N N G N N G N N G N N G N N G N G N G N N

G C T T N N N C C C N C N C N C N C G T N N C N C N N N C C C N C N C N N G N N N N C N N N C N N T N C T N N

T T C C N N T T T N T N N T N T T C N N T N T N N N T T T N T N N T N N N T N N N C N T A N N

1 N 0 1 1 0 0 0 0 N 1 0 N 1 0 0 N N 0 0 N 0 0 1 0 1 0 0 0 1 0 0 0 0 N 0 0 0 0 0 0 0 0 0 0 0 0 0 0 0 0 1 0 0 1 1 1 0 1 N

T N T T T A A A C N T A N T T A N N T A N A A T T T T T A A N A T T T N T N N N N A T A A T N T T T T N

1 N 1 0 1 2 2 2 2 N 1 2 N 1 1 2 N N 1 2 N 2 2 1 1 1 1 1 1 2 2 N 2 1 1 N 1 N N N N 2 1 2 2 0 N 1 1 1 1 1 N

T N C C T C C C C N C C N C C C N C C C C C C C T C C N C C C C C C C N C C C C C C T T C C N

T N T T T G G G A N T G N T T G N N T G N G T T T T T G N G T T N T N N N N G T G G T N T T T T N

T N G G T G G G N G N G G N N G G N G G G G G N G T G N G N N N N G G G N G G T T G N

C N C C C T T T T N C T N T C T N N C T N T T C C C C C T T N T C C C N C N N N T T T T C N C C C C T N

G N G G G G G N G N N A G N N G N G A G G G G G N G G N G N N N G A G G N G G G A N

C N T T C C C C C N T N N C T C N N T N N C C C T C T T C C C C C T T N T N N N N C C C C T N T C C C C C N

G N G G G G G N G N N A G N N G N N G A G G G G G N G A G N G N N N G A G G N G G G A N

G N C C G T T T N C N N G C T N N C N N T T G C C N C C C T T N T C C C N C N N N N G T T C N C C G G C G N

T N T T T C C C A N T N N T T C N N T N N C C T T T N T T T C C N C T T T N T N N N N T C C T N T T T T N



N 1 1 1 0 0 N 1 0 1 N N 0 0 1 N N 1 1 N 0 N 0 0 N 1 0 0 N N 0 0 1 1 1 1 0 0 1 1 N 0 N N 1 0 N 1 0 0 0 0 0 1 1 0

N T T T T T N T T T T N N A C T N N T T T N T T T T T T T T T T T T T T T T T T N A N N T T N T T A A T T T T T

N 1 1 1 0 1 N 1 1 1 N N 2 2 1 N N 1 1 N 1 1 N 1 1 0 N N 1 1 1 1 1 1 1 1 N 2 N N 1 1 N 1 1 2 2 1 0 0 1 1 1

N C C T N C N C C T N N C C T N N C C T N C N C N C C C C C T T C C C T C N C N N T C N C C C C C C C C C C C

N T T T N T N T T T N N G A T N N T T T N T N T T T T T T T T T T T T N G N N T T N T T G T T T T T

N G G T N G N G G T N N G G T N N G T N T N T N N G G N N G G T T G G T G N G N N T G N G G G T G G G

N T T C N C N C C C N N T T C N N T C N C N C N T C C N C C T C C C C C N T N N C C N C C T T C C C T T C

N A A G N G N G G N N G G N N A G N G N N A G N N G A G A G G G N G N G N G G G G G G A G

N C C C N T N C T C N N C C C N N C C N C N C T T N N T T C C C C T T C N N C N N C T N T T C C C T T C C T

N A A G N G N G G N N G G N N A G N A N A N N A G N N G A G A G G N N G N G G G G A G A G

N G G G N C N C C G N N T T G N N G N C N C N N G C C N N C C G G G C C G N N T N N G C N C C T T C C C G G C

N T T T N T N T T T N N C A T N N T T N T N T T T N N T T T T T T T T T T N N C N N T T N T T C C T T T T T

1 0 1 N 1 1 1 1 1 N N 1 N 1 0 0 0 N N 0 N 1 1 N 0 0 N N N N N N N N N 0 N 0 1 N 1 1 N 1 1 0 N 1 0 1 N 1 N 0 0 0 1 0 1 1

T A T N T T T T T N N T N T A A A N N T N T T N T T N N N N N A N T T N T T N T T A N T A T N T N A A A T A T T

1 2 1 N 1 1 1 1 N N 1 N 1 2 2 2 N N 1 N 1 1 N 1 1 N N 1 1 N 1 1 2 N 1 2 1 N 1 N 2 2 2 1 2 1 1

C C T N T T T C C N N T T C C C N N N N C T N C C N N N N N C N C T T N T T C N T C T N T N C C C T C T T

T N T N T T T T N N T N T G G G N N N N T T N T T N N N N N N N T T N T T G N T G T N T N G G T G T T

G N T N T T T G G N N T N T G G G N N N N G T N G G N N N N N N N G T N T T G N T G T N T N G G T G T T

T N C N C C C T N N C N C T T T N N N N C C N C C N N N N N N C C N C C T N C N C N T T T C T C C

A N G N G G A N N G N G G G N N N N G N N G N N N N N G N G N G G N G N G G N G G G G G G G G G G

C N C N C C C C C N N C C C C C C C C C C C C C C C C C C C C C C C C C C C C C C C C C C C C C C C C C C C C

A N G N G G A N N G N G G G N N N N G N N G N N N N N G N G N G G N G N G G N G N G G G G G G G G G G

G N G N G C G N N G N G T T T N N N N C N N C C N N N N N N N C G N G N G G T N G T G N G N T T T G T G G

T N T N T T T N N T N T C C C N N N N T N N T T N N N N N N T T N T T T C N T C T N T N C C C T C T T



|                                                                                                                                                    |                                                                                                                      |                                                                                                                                                         |                                                                                                                           |                                                                                                                                          |                                                                                                                                                    |                                                                                                                                                    |                                                                                                                                                    |                                                                                                                                |                                                                                                                                     |                                                                                                                                     |                                                                                                                                          |                                                                                                                                               |                                                                                                                                          |                                                                                                                                                                   |
|----------------------------------------------------------------------------------------------------------------------------------------------------|----------------------------------------------------------------------------------------------------------------------|---------------------------------------------------------------------------------------------------------------------------------------------------------|---------------------------------------------------------------------------------------------------------------------------|------------------------------------------------------------------------------------------------------------------------------------------|----------------------------------------------------------------------------------------------------------------------------------------------------|----------------------------------------------------------------------------------------------------------------------------------------------------|----------------------------------------------------------------------------------------------------------------------------------------------------|--------------------------------------------------------------------------------------------------------------------------------|-------------------------------------------------------------------------------------------------------------------------------------|-------------------------------------------------------------------------------------------------------------------------------------|------------------------------------------------------------------------------------------------------------------------------------------|-----------------------------------------------------------------------------------------------------------------------------------------------|------------------------------------------------------------------------------------------------------------------------------------------|-------------------------------------------------------------------------------------------------------------------------------------------------------------------|
| A<br>G<br>A<br>A<br>A<br>A<br>A<br>A<br>N<br>A<br>A<br>A<br>A<br>A<br>A<br>A<br>A<br>A<br>A<br>A<br>G<br>A<br>N<br>A                               | G<br>A<br>G<br>G<br>G<br>G<br>G<br>G<br>N<br>G<br>G<br>G<br>G<br>G<br>G<br>A<br>G<br>N<br>G                          | C<br>C<br>N<br>C<br>C<br>C<br>C<br>C<br>C<br>C<br>N<br>C<br>C<br>N<br>C<br>N<br>T<br>N<br>N<br>C<br>N<br>T                                              | T<br>T<br>N<br>T<br>T<br>G<br>T<br>T<br>G<br>N<br>T<br>T<br>G<br>N<br>T<br>T<br>N<br>T<br>T<br>N<br>T<br>T                | 0<br>0<br>N<br>0<br>0<br>3<br>3<br>0<br>0<br>3<br>N<br>0<br>0<br>3<br>N<br>3<br>N<br>0<br>0<br>N<br>0                                    | 0<br>0<br>N<br>0<br>0<br>9<br>9<br>9<br>9<br>9<br>9<br>9<br>9<br>9<br>9<br>N<br>0<br>0<br>0<br>0                                                   | G<br>G<br>N<br>G<br>G<br>C<br>C<br>G<br>G<br>G<br>G<br>G<br>G<br>G<br>G<br>G<br>G<br>G<br>G                                                        | G<br>G<br>N<br>G<br>G<br>C<br>C<br>G<br>G<br>G<br>G<br>G<br>G<br>G<br>G<br>G<br>G<br>G<br>G<br>G                                                   | C<br>C<br>N<br>C<br>C<br>G<br>G<br>C<br>C<br>G<br>C<br>C<br>G<br>C<br>C<br>G<br>C<br>C<br>G<br>C<br>C                          | 0<br>0<br>N<br>0<br>0<br>1<br>1<br>0<br>0<br>1<br>0<br>0<br>1<br>0<br>0<br>1<br>N<br>1<br>N<br>0<br>0<br>0                          | A<br>A<br>N<br>A<br>A<br>G<br>G<br>A<br>A<br>G<br>A<br>A<br>G<br>N<br>G<br>N<br>A<br>A<br>A<br>A                                    | 8<br>8<br>N<br>8<br>8<br>8<br>8<br>8<br>8<br>8<br>8<br>N<br>0<br>N<br>8<br>8<br>8<br>8                                                   | C<br>C<br>N<br>C<br>C<br>G<br>G<br>C<br>C<br>G<br>C<br>C<br>G<br>C<br>C<br>G<br>N<br>G<br>N<br>C<br>C<br>G                                    | 2<br>2<br>N<br>2<br>2<br>1<br>1<br>2<br>2<br>1<br>2<br>2<br>2<br>1<br>N<br>2<br>N<br>2<br>2<br>2<br>1                                    | A<br>A<br>N<br>A<br>A<br>A<br>A<br>A<br>A<br>A<br>A<br>A<br>A<br>N<br>T<br>N<br>A<br>A<br>A                                                                       |
| A<br>A<br>A<br>A<br>A<br>A<br>A<br>A<br>A<br>A<br>A<br>N<br>A<br>A<br>A<br>A<br>A<br>A<br>A<br>A<br>A<br>A<br>A<br>A<br>A<br>A<br>G<br>A<br>A<br>G | G<br>G<br>G<br>G<br>G<br>G<br>G<br>G<br>N<br>G<br>G<br>G<br>G<br>G<br>G<br>G<br>G<br>G<br>G<br>G<br>A<br>G<br>G<br>A | C<br>C<br>T<br>C<br>T<br>C<br>T<br>C<br>N<br>C<br>N<br>N<br>T<br>C<br>C<br>T<br>C<br>C<br>N<br>C<br>N<br>C<br>N<br>C<br>C<br>C<br>C<br>C<br>C<br>C<br>T | G<br>G<br>T<br>T<br>T<br>T<br>G<br>N<br>N<br>N<br>T<br>G<br>T<br>T<br>G<br>N<br>N<br>G<br>N<br>T<br>G<br>T<br>T<br>G<br>T | 3<br>3<br>0<br>0<br>3<br>0<br>3<br>3<br>N<br>3<br>3<br>N<br>3<br>3<br>N<br>3<br>3<br>N<br>3<br>3<br>N<br>0<br>3<br>0<br>0<br>3<br>3<br>3 | 9<br>9<br>0<br>0<br>9<br>9<br>9<br>9<br>N<br>9<br>N<br>9<br>9<br>9<br>9<br>N<br>9<br>N<br>9<br>9<br>9<br>9<br>N<br>9<br>9<br>9<br>9<br>9<br>9<br>9 | C<br>C<br>G<br>G<br>C<br>C<br>N<br>C<br>N<br>C<br>N<br>C<br>C<br>C<br>C<br>C<br>C<br>G<br>C<br>C<br>N<br>C<br>C<br>N<br>C<br>C<br>G<br>G<br>C<br>C | C<br>C<br>G<br>G<br>C<br>C<br>N<br>C<br>N<br>C<br>N<br>C<br>C<br>C<br>C<br>C<br>G<br>C<br>C<br>G<br>N<br>C<br>C<br>N<br>C<br>C<br>G<br>G<br>C<br>C | G<br>G<br>C<br>C<br>G<br>C<br>G<br>N<br>G<br>N<br>G<br>G<br>G<br>G<br>C<br>C<br>N<br>G<br>N<br>C<br>C<br>G<br>C<br>C<br>G<br>G | 1<br>1<br>0<br>0<br>1<br>0<br>1<br>1<br>N<br>1<br>1<br>N<br>1<br>1<br>1<br>0<br>N<br>1<br>1<br>N<br>0<br>1<br>0<br>0<br>1<br>1<br>1 | G<br>G<br>A<br>A<br>G<br>A<br>G<br>N<br>G<br>N<br>G<br>N<br>G<br>G<br>G<br>A<br>G<br>A<br>N<br>G<br>N<br>A<br>G<br>A<br>A<br>G<br>G | 8<br>8<br>8<br>8<br>0<br>8<br>0<br>8<br>N<br>8<br>8<br>N<br>0<br>8<br>8<br>8<br>8<br>N<br>8<br>8<br>8<br>8<br>0<br>8<br>8<br>8<br>8<br>0 | G<br>G<br>G<br>C<br>G<br>C<br>G<br>N<br>G<br>N<br>G<br>G<br>G<br>G<br>C<br>C<br>G<br>C<br>C<br>N<br>G<br>G<br>C<br>C<br>G<br>C<br>C<br>G<br>G | 1<br>1<br>1<br>2<br>2<br>2<br>1<br>N<br>1<br>1<br>N<br>N<br>2<br>1<br>1<br>2<br>2<br>1<br>1<br>2<br>2<br>2<br>2<br>2<br>2<br>2<br>1<br>2 | A<br>A<br>A<br>A<br>T<br>A<br>T<br>A<br>N<br>A<br>A<br>N<br>N<br>T<br>A<br>A<br>T<br>A<br>A<br>A<br>A<br>N<br>A<br>A<br>A<br>A<br>A<br>T<br>A<br>A<br>A<br>A<br>T |





A A A N G A A A A A A G A A G A A G A A A A A A A A A A A A A N A A A A A A A A A N A A A A A A A A A N  
G G G N A G G G G G A G A G A G G G G G N G G G G G G N G G G N  
C C C C C N C C C C C C T C C C C N C C C T C C C T C C C T C C C N C C C C C N C C C C C N C C C N C C C  
G G G T N G T T T T T G T T T G T T T G T T G T T G T T G N G N G T N G G T T T N T T N G G G  
3 3 3 0 0 3 3 0 0 0 0 3 3 0 0 3 3 3 3 3 3 3 0 3 3 3 3 3 3 0 3 3 3 0 3 3 3 0 3 3 3 0 3 3 0 3 3 3  
9 9 9 0 0 9 9 9 9 9 9 9 9 9 9 9 9 9 9 9 9 9 9 9 9 9 9 9 9 9 9 9 9 9 9 9 9 9 9 9 9 9 9 9 9 9 9  
C C C C G C C G C C G G G G C C G C C G C C G C C G C C G C C G C C G C C G C C G C C G C C G C C G C C G C C  
C C C C G C C G C C G G G G C C G C C G C C G C C G C C G C C G C C G C C G C C G C C G C C G C C G C C G C C  
G G G C C G C C G C C G C C G C C G C C G C C G C C G C C G C C G C C G C C G C C G C C G C C G C C G C C G C C  
1 1 1 1 0 0 1 1 0 0 0 0 1 0 1 1 0 0 1 1 0 1 1 0 1 1 0 1 1 0 1 1 0 1 1 0 1 1 0 1 1 0 1 1 0 1 1  
G G G A A G A A A A A G A G A A A G A G A G A G A G A G A G A G A G A G A G A G A G A G A G A G A G A G A G A  
8 8 8 8 8 8 8 8 8 8 8 8 8 8 8 8 8 8 8 8 8 8 8 8 8 8 8 8 8 8 8 8 8 8 8 8 8 8 8 8 8 8 8 8 8 8 8 8  
G G G C C G C C G C C G C C G C C G C C G C C G C C G C C G C C G C C G C C G C C G C C G C C G C C G C C G C C  
1 0 1 1 1 2 0 1 2 2 2 2 1 2 2 1 2 2 1 1 2 2 1 1 2 2 1 2 1 2 1 2 1 2 1 2 1 2 1 2 1 2 1 2 1 2 1 2  
A A A A A A A A A A A T A A A A A A A A A A A T A A A A A T A A A A A T A A A A A T A A A A A T A A A A A

| ASL14 | ASL15 | ASL16 | ASL17 | ASL18 | ASL19 | ASL20 | ASL21 | ASL22 | ASL23 | ASL24 | ASL25 | ASL26 |
|-------|-------|-------|-------|-------|-------|-------|-------|-------|-------|-------|-------|-------|
| 5     | 8     | 4     | 4     | T     | C     | C     | G     | G     | T     | C     | A     | 121   |
| 5     | 8     | 0     | 0     | T     | C     | C     | G     | G     | T     | C     | A     | 121   |
| 0     | 0     | 4     | 4     | A     | A     | T     | A     | C     | G     | G     | A     | 0     |
| 5     | 8     | 0     | 0     | T     | C     | C     | N     | G     | N     | C     | A     | 121   |
| N     | N     | N     | N     | N     | N     | C     | C     | C     | N     | C     | N     | N     |
| 0     | 0     | 4     | 0     | T     | C     | C     | C     | G     | T     | C     | A     | N     |
| 5     | 0     | 0     | 0     | T     | C     | C     | G     | G     | T     | C     | A     | N     |
| 5     | 8     | 0     | 0     | T     | C     | C     | G     | G     | T     | C     | A     | 121   |
| 0     | 0     | 4     | 4     | A     | A     | T     | A     | C     | G     | G     | A     | N     |
| 0     | 0     | 4     | 4     | A     | A     | T     | A     | C     | G     | G     | A     | 0     |
| 5     | 8     | 0     | 0     | T     | C     | C     | G     | G     | T     | C     | A     | 121   |
| 0     | 0     | 4     | 4     | A     | A     | T     | A     | C     | G     | G     | A     | 0     |
| 5     | 8     | 0     | 0     | T     | C     | C     | G     | G     | T     | C     | A     | 121   |
| 0     | 0     | 4     | 4     | A     | A     | T     | A     | C     | G     | G     | A     | 0     |
| 5     | 8     | 0     | 0     | T     | C     | C     | G     | G     | T     | C     | A     | 121   |
| 0     | 0     | 4     | 4     | A     | A     | T     | A     | C     | G     | G     | A     | 0     |
| 5     | 8     | 0     | 0     | T     | C     | C     | G     | G     | T     | C     | A     | 121   |
| 0     | 0     | 4     | 4     | A     | A     | T     | A     | C     | G     | G     | A     | 0     |
| 5     | 8     | 0     | 0     | T     | C     | C     | G     | G     | T     | C     | A     | 121   |
| 0     | 0     | 4     | 4     | A     | A     | T     | A     | C     | G     | G     | A     | 0     |
| 5     | 8     | 0     | 0     | T     | C     | C     | G     | G     | T     | C     | A     | 121   |
| 0     | 0     | 4     | 4     | A     | A     | T     | A     | C     | G     | G     | A     | 0     |
| 5     | 8     | 0     | 0     | T     | C     | C     | G     | G     | T     | C     | A     | 121   |
| 0     | 0     | 4     | 4     | A     | A     | T     | A     | C     | G     | G     | A     | 0     |
| 5     | 8     | 0     | 0     | T     | C     | C     | G     | G     | T     | C     | A     | 121   |
| 0     | 0     | 4     | 4     | A     | A     | T     | A     | C     | G     | G     | A     | 0     |
| 5     | 8     | 0     | 0     | T     | C     | C     | G     | G     | T     | C     | A     | 121   |
| 0     | 0     | 4     | 4     | A     | A     | T     | A     | C     | G     | G     | A     | 0     |
| 5     | 8     | 0     | 0     | T     | C     | C     | G     | G     | T     | C     | A     | 121   |
| 0     | 0     | 4     | 4     | A     | A     | T     | A     | C     | G     | G     | A     | 0     |
| 5     | 8     | 0     | 0     | T     | C     | C     | G     | G     | T     | C     | A     | 121   |
| 0     | 0     | 4     | 4     | A     | A     | T     | A     | C     | G     | G     | A     | 0     |
| 5     | 8     | 0     | 0     | T     | C     | C     | G     | G     | T     | C     | A     | 121   |
| 0     | 0     | 4     | 4     | A     | A     | T     | A     | C     | G     | G     | A     | 0     |
| 5     | 8     | 0     | 0     | T     | C     | C     | G     | G     | T     | C     | A     | 121   |
| 0     | 0     | 4     | 4     | A     | A     | T     | A     | C     | G     | G     | A     | 0     |
| 5     | 8     | 0     | 0     | T     | C     | C     | G     | G     | T     | C     | A     | 121   |
| 0     | 0     | 4     | 4     | A     | A     | T     | A     | C     | G     | G     | A     | 0     |
| 5     | 8     | 0     | 0     | T     | C     | C     | G     | G     | T     | C     | A     | 121   |
| 0     | 0     | 4     | 4     | A     | A     | T     | A     | C     | G     | G     | A     | 0     |
| 5     | 8     | 0     | 0     | T     | C     | C     | G     | G     | T     | C     | A     | 121   |
| 0     | 0     | 4     | 4     | A     | A     | T     | A     | C     | G     | G     | A     | 0     |
| 5     | 8     | 0     | 0     | T     | C     | C     | G     | G     | T     | C     | A     | 121   |
| 0     | 0     | 4     | 4     | A     | A     | T     | A     | C     | G     | G     | A     | 0     |
| 5     | 8     | 0     | 0     | T     | C     | C     | G     | G     | T     | C     | A     | 121   |
| 0     | 0     | 4     | 4     | A     | A     | T     | A     | C     | G     | G     | A     | 0     |
| 5     | 8     | 0     | 0     | T     | C     | C     | G     | G     | T     | C     | A     | 121   |
| 0     | 0     | 4     | 4     | A     | A     | T     | A     | C     | G     | G     | A     | 0     |



|   |   |   |   |   |   |   |   |   |   |   |   |   |     |
|---|---|---|---|---|---|---|---|---|---|---|---|---|-----|
| 0 | 0 | 4 | 4 | A | A | T | A | C | C | G | G | A | 0   |
| 0 | 0 | 4 | 4 | A | A | N | A | N | T | C | G | N | 0   |
| N | N | N | N | N | N | T | T | C | C | C | N | A | 121 |
| 0 | 0 | 4 | 4 | A | A | A | A | A | A | A | A | A | 0   |
| 0 | 0 | 4 | 4 | A | A | T | A | A | A | A | A | A | 121 |
| 5 | 8 | 0 | 0 | T | C | C | T | A | G | G | G | A | 121 |
| 5 | 8 | 0 | 0 | T | C | C | T | T | A | A | A | A | 0   |
| 0 | 0 | 4 | 4 | A | A | T | A | C | A | C | C | A | 121 |
| 0 | 0 | 4 | 4 | A | A | N | A | N | T | C | C | A | 0   |
| 5 | 8 | 0 | 0 | T | C | C | T | A | A | A | A | A | 121 |
| 0 | 0 | 4 | 4 | A | A | T | A | A | A | A | A | A | 0   |
| 0 | 0 | 4 | 4 | A | A | T | A | A | A | A | A | A | 121 |
| 0 | 0 | 4 | 4 | A | A | N | A | N | T | C | C | A | 0   |
| 0 | 0 | 4 | 4 | A | A | T | A | A | A | A | A | A | 121 |
| 5 | 8 | 0 | 0 | T | C | C | T | A | A | A | A | A | 0   |
| 5 | 8 | 0 | 0 | T | C | C | T | T | A | A | A | A | 121 |
| 0 | 0 | 4 | 4 | A | A | T | A | A | A | A | A | A | 121 |
| 0 | 0 | 4 | 4 | A | A | N | A | N | T | C | C | A | 0   |
| 0 | 0 | 4 | 4 | A | A | T | A | A | A | A | A | A | 121 |
| 0 | 0 | 4 | 4 | A | A | T | A | A | A | A | A | A | 0   |
| 0 | 0 | 4 | 4 | A | A | T | A | A | A | A | A | A | 121 |
| 0 | 0 | 4 | 4 | A | A | N | A | N | T | C | C | A | 121 |
| 5 | 8 | 0 | 0 | T | C | C | T | A | A | A | A | A | 121 |
| 5 | 8 | 0 | 0 | T | C | C | T | T | A | A | A | A | 121 |
| 0 | 0 | 4 | 4 | A | A | T | A | A | A | A | A | A | 0   |
| 0 | 0 | 4 | 4 | A | A | N | A | N | T | C | C | A | 121 |
| 0 | 0 | 4 | 4 | A | A | T | A | A | A | A | A | A | 121 |
| 0 | 0 | 4 | 4 | A | A | T | A | A | A | A | A | A | 0   |
| 0 | 0 | 4 | 4 | A | A | T | A | A | A | A | A | A | 121 |
| 5 | 8 | 0 | 0 | T | C | C | T | A | A | A | A | A | 121 |
| 5 | 8 | 0 | 0 | T | C | C | T | T | A | A | A | A | 121 |
| 0 | 0 | 4 | 4 | A | A | T | A | A | A | A | A | A | 0   |
| 0 | 0 | 4 | 4 | A | A | N | A | N | T | C | C | A | 121 |
| 0 | 0 | 4 | 4 | A | A | T | A | A | A | A | A | A | 121 |
| 0 | 0 | 4 | 4 | A | A | T | A | A | A | A | A | A | 0   |
| 0 | 0 | 4 | 4 | A | A | N | A | N | T | C | C | A | 121 |
| 0 | 0 | 4 | 4 | A | A | T | A | A | A | A | A | A | 121 |
| 5 | 8 | 0 | 0 | T | C | C | T | A | A | A | A | A | 121 |
| 5 | 8 | 0 | 0 | T | C | C | T | T | A | A | A | A | 121 |



|   |   |   |   |   |   |   |   |   |   |   |     |
|---|---|---|---|---|---|---|---|---|---|---|-----|
| 5 | 8 | 0 | 0 | T | C | C | G | T | C | A | 121 |
| 0 | 0 | 4 | 4 | A | A | T | A | G | T | A | N   |
| 5 | 8 | 4 | 0 | T | C | T | G | T | C | A | 0   |
| 5 | 8 | 0 | 0 | T | C | T | G | T | C | A | 121 |
| N | N | N | N | T | C | T | G | T | C | A | 121 |
| 0 | 0 | 4 | 4 | T | C | T | G | T | C | A | 0   |
| 0 | 0 | 4 | 4 | T | C | T | G | T | C | A | 121 |
| 5 | 8 | 4 | 0 | T | C | T | G | T | C | A | 121 |
| 0 | 0 | 4 | 4 | T | C | T | G | T | C | A | N   |
| 0 | 0 | 4 | 4 | T | C | T | G | T | C | A | 0   |
| 5 | 8 | 0 | 0 | T | C | T | G | T | C | A | 121 |
| 0 | 0 | 4 | 4 | T | C | T | G | T | C | A | N   |
| 5 | 8 | 0 | 0 | T | C | T | G | T | C | A | N   |
| 5 | 8 | 0 | 0 | T | C | T | G | T | C | A | 121 |
| 5 | 8 | 0 | 4 | T | C | T | G | T | C | A | 0   |
| 5 | 8 | 0 | 4 | T | C | T | G | T | C | A | 0   |
| 5 | 8 | 0 | 0 | T | C | T | G | T | C | A | 121 |
| 5 | 8 | 0 | 0 | T | C | T | G | T | C | A | 121 |
| 5 | 8 | 0 | 0 | T | C | T | G | T | C | A | 121 |
| 5 | 8 | 0 | 4 | T | C | T | G | T | C | A | 0   |
| 0 | 0 | 4 | 4 | T | C | T | G | T | C | A | 0   |
| 5 | 8 | 0 | 0 | T | C | T | G | T | C | A | 121 |
| 0 | 0 | 4 | 4 | T | C | T | G | T | C | A | 0   |
| 0 | 0 | 4 | 4 | T | C | T | G | T | C | A | 0   |
| 5 | 8 | 0 | 0 | T | C | T | G | T | C | A | 121 |
| 5 | 8 | 0 | 0 | T | C | T | G | T | C | A | 121 |







NNNCTCCCTNNNTTTTNCNTCTTTCTCTCTCTNT-TCNCTNCTTTCTTT  
NNNAACAACNNCCNCNANCAACAACAACAACAACAACAACAACAACAACA  
NNNTCTTTTCNNCCNCCTCCTCCTCCTCCTCCTCCTCCTCCTCCTCCTC  
NNN444404NN444444444444444444444444444444444444  
NNNTCTTTTCNNCCNCCTCCTCCTCCTCCTCCTCCTCCTCCTCCTCCTC  
NNNGCCGCGCNCNCNCNCNCNCNCNCNCNCNCNCNCNCNCNCNCNCNCNC  
NN03303303333333333333333333333333333333333333333  
NNTCCTTTCTCCCTCCCTCCTCCTCCTCCTCCTCCTCCTCCTCCTCCTCCT  
NNAAGGGGGGGGGGGGGGGGGGGGGGGGGGGGGGGGGGGGGGGGGGGGG  
NN11888888888888888888888888888888888888888888888  
N- - - -GGGGGGGGGGGGGGGGGGGGGGGGGGGGGGGGGGGGGGGGGG  
NNN0000000000000000000000000000000000000000000000  
NN01011110111011001000001N01111111111N1111011N0110

T N C T T T T C T T T N T T C C N T T C N N N T T C T T T T T T T T T T T C C T T T T C T T T T T T N T T T T N C C T T C C T T

C N A C C C A C C N C A A N C A N N C A C A C C C C C - N C C C C A A C C C A C C C - C N C C C C N A A C A A C C C

C N T T C C C C T T C C N C T T T N C T N N N T T T T T C C C C T T C C C T T T C N C C T T N T T T C T T T T T C C

4 N 4 4 4 4 0 4 4 0 4 4 0 4 4 0 4 4 0 4 4 4 4 0 4 4 4 4 4 4 4 4 4 4 4 4 4 4 4 4 4 4 4 4 4 4 4 4 4 4 4 4 4 4 4 4 4 4 4 4 4 4 4

C N T C C C C T T C C N C T T N C T N N N C T T C C C C C C C C C C C C C C C C C C C C C C C C C C C C C C C C C C C C C C

C N G C C C C G C C C N C G N C G N Z N Z C C G C C C C C C C C C C C C C C C C C C C C C C C C C C C C C C C C C C C C C

3 3 3 3 3 N 0 0 3 3 0 N N 3 3 0 3 3 3 3 0 N 0 3 3 3 3 3 3 3 3 3 3 3 3 3 3 3 3 3 3 3 3 3 3 3 3 3 3 3 3 3 3 3 3 3 3 3 3 3 3 3 3

C C C C C C N T T C C T N N C C T C C C C T N T C N C T C C C C C C C C C C C C C C C C C C C C C C C C C C C C C C C C C

G G N G G N G G G G N N G A G G G A N A G N G G N G G G G G G G G G N G N G G G A N A A N G G

8 8 N 8 8 N 8 8 8 8 8 8 8 8 8 8 11 8 8 8 8 11 8 11 8 8 8 8 8 8 8 8 8 8 8 8 8 8 8 8 8 8 8 8 8 8 8 8 8 8 8 8 8 8 8 8

G T N G G N G G G G G G G N N G G G G G G G G G - G G G G - - G N G T G N G G G N G T G G G G G G G N G N T G G G G - - N G G

0 1 N 0 0 N 0 0 0 0 0 0 0 0 0 0 0 0 0 0 0 0 0 0 0 0 0 0 0 0 0 0 0 0 0 0 0 0 0 0 0 0 0 0 0 0 0 0 0 0 0 0 0 0 0 0 0 0 0 0 0

0 3 N 0 0 N 1 1 0 1 1 1 N N 1 0 0 1 1 1 1 0 N 0 0 N 1 3 1 N 1 0 0 N 1 3 0 0 0 N 1 1 1 N 1 N 3 1 1 1 0 N 1 0 0 N 0 0



T T T T T T C T T T C C C C T N C T T C C T T T T T T T T T N T C T T C C T T T T C T T T C C T T T T C C N T T T C C C N C T N T T T N

C C C C C A C C A A A C N A C C A A C C C C N C A C C A C C C A N C C C A A A N A C N C C C N

C C C C C T C C T T T T T N T C C T T T T C C T C C T C C C C C C C C C C C C C T T T N T C N C C C N

4 4 4 4 0 4 4 0 0 4 N 4 4 4 4 0 4 4 4 4 4 4 4 4 4 4 4 4 4 0 4 4 4 4 4 4 4 4 4 4 4 4 4 4 4 4 4 4 4 4 4 4 4 4 4 4

C C C C C T C C T T N T C N N C C T T C C C C C C N C C C C C C C C C C C C C T C C C C C C N T N N C N C C C N

C C C C C G C C G N G C N Z C C C C C C C C C C C C C C C C C C C C C C C C C C C C C C C C C C C C C C C C C C C C C C C

3 3 3 0 3 3 N 3 3 0 3 3 3 0 3 N 3 0 N 3 3 0 N 3 3 0 N 3 3 0 3 3 3 3 3 3 3 3 3 3 3 3 3 3 3 3 3 3 3 3 3 3 3 3 3 3 3

C C C C T T C C N C C T C C C T C C C T C N C C T T N T T T C C C T C C T T C C C T T C C C C N C T C N

A A A G G G A N G G A G G G A G N A G G G N A N G G G G G G G G G G G G G G G G G G G G G G G G G G G G G G

11 11 8 8 8 11 N 8 8 11 8 8 8 18 8 11 8 N 11 8 8 8 11 N 8 8 8 8 8 8 8 8 8 8 8 8 8 8 8 8 8 8 8 8 8 8 8 8 8 8 8 8

- - - G G G - - - N G T - - - G G G N - - - G - - - G N T T G N G G G G G G G G G G T T - - - G G G G G G

N N N 0 0 0 0 0 0 0 0 1 N 0 0 0 0 0 0 0 0 0 0 0 0 0 0 0 0 0 0 0 1 0 0 0 0 0 0 0 0 0 0 0 0 0 0 0 0 0 0 0 0 0 0 0 0 0 0 0 0 0 0

0 0 0 1 1 1 0 0 N 1 3 0 1 0 1 N 0 1 0 1 N 0 0 1 1 N 0 N 3 3 0 N 1 1 1 1 0 0 1 N 0 0 0 3 0 1 0 0 0 0 0 0 0 0 0 0 0 0 0 0 0 0 0 0 0





NN000550005000500000000000N00005N050050000N0000N0000000000

NNGGCCCGCCCGCCCGCCCGCCCGCCCGCCCGCCGCGCCGCGCCNCCNCCNCCGCGCGCCNCCNCCGGGNCNCGGNCC

NN00000000333003000000000000N000000000000000000000000000000000

NNTTTTTTTAAATTAATTAATTAATTTNTTTTTTTTTTTTTTTTTTTTTTTTTTTTTTTTTTTTT

NN00000000222002000200000200000000000000000000000000000000000

NN000N0000111010N100010N00000000000000000000000000000000000

NNAANAAGGAGANGAAGAANAANAANAANAANAANAANAANAANAANAANAANAANAANA

NNTTTTTTTAATAATNATTTATNTNTTTTTTNTTTTNTTTTNTTTTNTTTTNTTTTNTTTT

NNGGNGGGAAGAAGNAGGAGNGGNGGGGGGGGNGGGGGGGGGGGGGGGGGGGGGGGGGGGGG

NCCCCCCCCCTTCCTCNCCTCCCNCCNCCNCCNCCNCCNCCNCCNCCNCCNCCNCCNCCNCC

NCCCCCCCCCTTCCTCNCCTCCCNCCNCCNCCNCCNCCNCCNCCNCCNCCNCCNCCNCCNCC

NN440N0440333030N304430N0004N000400040004N0000044444NN040NN440

NCCNCCNCCCTTCTCNTCCCTCNCNCCNCCNCCNCCNCCNCCNCCNCCNCCNCCNCCNCCNCC





| ASL53 | ABC1 | ABC2 | ABC3 | ABC4 | ABC5 | ABC6 | ABC7 | ABC8 | ABC9 | ABC10 | ABC11 | ABC12 | ABC13 |
|-------|------|------|------|------|------|------|------|------|------|-------|-------|-------|-------|
| N     | 2    | G    | 27   | 11   | 5    | T    | C    | G    | T    | A     | 1     | 3     | G     |
| N     | 2    | G    | 27   | 11   | 0    | T    | C    | G    | T    | A     | 0     | 3     | G     |
| N     | N    | N    | N    | N    | N    | N    | N    | N    | N    | N     | N     | N     | N     |
| G     | 2    | G    | 27   | 11   | 0    | T    | C    | G    | T    | A     | 0     | 3     | G     |
| G     | 0    | C    | 0    | 1    | 5    | C    | C    | A    | C    | T     | 1     | 0     | C     |
| T     | 2    | G    | 27   | 11   | 0    | C    | C    | A    | C    | T     | 0     | 3     | G     |
| T     | 2    | G    | 0    | 1    | 5    | C    | C    | A    | C    | T     | 1     | 3     | C     |
| G     | 2    | G    | 0    | 1    | 5    | C    | C    | A    | C    | C     | 1     | 3     | C     |
| N     | 2    | G    | 0    | 1    | 5    | C    | C    | A    | C    | C     | 1     | 3     | C     |
| N     | N    | N    | N    | N    | N    | N    | N    | N    | N    | N     | N     | N     | N     |
| N     | 2    | G    | 27   | 11   | 0    | T    | C    | G    | T    | A     | 0     | 3     | G     |
| T     | 2    | G    | 0    | 1    | 5    | C    | C    | A    | C    | T     | 1     | 3     | C     |
| T     | 2    | G    | 27   | 11   | 0    | T    | C    | G    | T    | A     | 0     | 3     | G     |
| G     | N    | N    | N    | 1    | 5    | C    | C    | A    | C    | C     | 1     | 3     | C     |
| T     | 2    | G    | 0    | 1    | 5    | C    | C    | A    | C    | C     | 1     | 3     | C     |
| T     | 2    | G    | 0    | 1    | 5    | C    | C    | A    | C    | C     | 1     | 3     | C     |
| T     | 2    | G    | 0    | 1    | 5    | C    | C    | A    | C    | C     | 1     | 3     | C     |
| T     | 0    | C    | 0    | 1    | 5    | C    | C    | A    | C    | C     | 1     | 0     | C     |
| T     | 2    | G    | 27   | 11   | 0    | T    | C    | G    | T    | A     | 0     | 3     | G     |
| T     | 2    | G    | 0    | 1    | 5    | C    | C    | A    | C    | C     | 1     | 3     | C     |
| N     | 2    | G    | 0    | 1    | 5    | C    | C    | A    | C    | C     | 1     | 3     | C     |
| G     | 2    | G    | 0    | 1    | 5    | C    | C    | A    | C    | C     | 1     | 3     | C     |
| G     | 2    | G    | 0    | 1    | 5    | C    | C    | A    | C    | C     | 1     | 3     | C     |
| G     | 0    | C    | 0    | 1    | 5    | C    | C    | A    | C    | C     | 1     | 0     | C     |
| G     | 2    | G    | 0    | 1    | 5    | C    | C    | A    | C    | C     | 1     | 3     | C     |
| G     | 2    | G    | 27   | 11   | 0    | T    | C    | G    | T    | A     | 0     | 3     | G     |
| G     | 2    | G    | 0    | 1    | 5    | C    | C    | A    | C    | C     | 1     | 3     | C     |
| G     | 2    | G    | 27   | 11   | 0    | T    | C    | G    | T    | A     | 0     | 3     | G     |
| N     | 2    | G    | 27   | 11   | 0    | T    | C    | G    | T    | A     | 0     | 3     | G     |
| N     | N    | N    | N    | N    | N    | N    | N    | N    | N    | N     | N     | N     | N     |
| N     | 2    | G    | 27   | 11   | 0    | T    | C    | G    | T    | A     | 0     | 3     | G     |
| T     | 2    | G    | 27   | 11   | 0    | T    | C    | G    | T    | A     | 0     | 3     | G     |
| N     | 2    | G    | 27   | 11   | 0    | T    | C    | G    | T    | A     | 0     | 3     | G     |
| N     | 2    | G    | 27   | 11   | 0    | T    | C    | G    | T    | A     | 0     | 3     | G     |
| N     | 2    | G    | 27   | 11   | 0    | T    | C    | G    | T    | A     | 0     | 3     | G     |
| N     | 2    | G    | 27   | 11   | 0    | T    | C    | G    | T    | A     | 0     | 3     | G     |
| N     | 0    | C    | 0    | 1    | 5    | C    | C    | A    | C    | T     | 1     | 0     | C     |







N  
T  
N  
G  
G  
N  
T  
T  
N  
N  
T  
T  
T  
T  
N  
N  
T  
T  
T  
T  
T  
T  
T  
T  
T  
T  
G  
N  
N  
T  
T  
N  
N  
G  
G  
N  
G  
N  
T  
T  
G  
G  
G  
N  
N  
N  
N  
N  
N  
G  
N  
G  
T  
T  
N  
T  
T  
T  
N  
G  
N

0  
2  
2  
N  
N  
0  
2  
2  
N  
N  
2  
2  
N  
N  
2  
0  
0  
N  
N  
0  
2  
0  
2  
N  
N  
N  
0  
0  
2  
2  
2  
N  
2  
2  
2  
2  
2  
2  
2  
2  
2  
0  
2  
0  
0  
N  
N  
N  
0  
N  
2  
N  
N  
2  
0  
2  
2  
2  
2  
2

C  
G  
G  
N  
C  
G  
G  
N  
G  
N  
N  
N  
G  
C  
C  
N  
N  
C  
C  
G  
G  
N  
G  
N  
N  
C  
C  
N  
N  
G  
N  
N  
G  
C  
G  
G  
G  
G

0  
0  
27  
N  
0  
27  
27  
0  
0  
0  
0  
N  
0  
0  
0  
N  
0  
0  
N  
0  
0  
0  
N  
N  
N  
N  
0  
0  
27  
27  
0  
N  
27  
27  
0  
0  
0  
27  
0  
0  
0  
N  
N  
N  
N  
N  
N  
N  
N  
N  
N  
N  
27  
N  
N  
N  
0  
0  
0  
0  
27  
0  
0

1  
1  
11  
N  
1  
11  
11  
1  
1  
1  
1  
N  
1  
1  
1  
N  
1  
1  
1  
11  
1  
1  
1  
N  
N  
N  
1  
1  
11  
11  
1  
1  
1  
1  
1  
1  
1  
1  
N  
1  
N  
N  
N  
N  
11  
N  
N  
2  
1  
1  
1  
1  
11  
1  
1

5  
5  
0  
N  
5  
0  
0  
0  
5  
5  
5  
5  
N  
5  
5  
5  
5  
N  
5  
0  
5  
5  
0  
5  
5  
N  
5  
5  
0  
5  
5  
5  
5  
5  
5  
0  
5  
5  
5  
5  
5

C  
C  
C  
N  
C  
C  
C  
C  
C  
C  
C  
C  
N  
C  
C  
C  
C  
C  
C  
C  
C  
C  
C  
C  
N  
C  
C  
N  
C  
N  
T  
C  
C  
C  
C  
C  
C  
C  
C  
C  
C

T  
T  
C  
N  
T  
C  
C  
T  
T  
T  
T  
N  
T  
T  
T  
T  
T  
T  
T  
C  
T  
C  
T  
T  
N  
N  
T  
T  
C  
T  
T  
C  
T  
T  
T  
C  
T  
T  
T  
T  
T  
T  
T  
T  
T  
C  
T  
T

A  
A  
G  
N  
A  
G  
A  
A  
A  
A  
N  
A  
A  
A  
A  
A  
A  
G  
A  
A  
A  
G  
A  
A  
A  
G  
A  
A  
A  
A  
A  
N  
A  
N  
G  
A  
A  
A  
A  
A  
G  
A  
A

C  
C  
T  
N  
C  
T  
T  
C  
C  
C  
N  
C  
C  
C  
C  
N  
C  
C  
T  
C  
C  
N  
N  
C  
C  
T  
T  
C  
C  
C  
T  
T  
C  
C  
C  
C  
T  
T  
C  
C  
C  
C  
C  
C  
C  
C  
C

T  
T  
A  
N  
T  
A  
A  
T  
T  
T  
T  
N  
T  
T  
T  
T  
T  
T  
A  
T  
A  
T  
T  
N  
N  
T  
T  
A  
A  
T  
T  
A  
A  
T  
T  
T  
T  
T  
T  
N  
T  
N  
A  
T  
T  
T  
T  
T  
A  
T  
T

1  
1  
0  
N  
1  
0  
0  
1  
1  
1  
1  
N  
1  
1  
1  
1  
N  
1  
1  
0  
1  
0  
1  
1  
N  
N  
1  
1  
0  
0  
1  
1  
1  
1  
0  
1  
1  
1  
1  
N  
1  
N  
0  
1  
1  
1  
1  
1  
1  
1  
0  
1  
1

0  
3  
3  
N  
0  
3  
3  
3  
3  
3  
N  
3  
0  
0  
0  
N  
3  
0  
3  
0  
3  
0  
3  
N  
N  
N  
0  
0  
3  
3  
3  
3  
3  
3  
3  
0  
3  
3  
0  
0  
N  
0  
N  
3  
3  
3  
3  
3  
3  
3

C  
C  
G  
N  
C  
G  
G  
C  
C  
C  
N  
C  
C  
C  
N  
C  
C  
G  
C  
C  
N  
N  
C  
C  
G  
C  
C  
N  
C  
C  
G  
C  
C  
G  
C  
C  
C  
C  
G  
C  
C  
C  
C  
C  
C

GGGGTTGGNTTTTNNNNNTTNGGNNTTNGGTGNGTNTNNTTNTGTTTNGGN

2N2020200NN22N002220222N22222N22220020022N

GNCGCCCNNGGNCGGGGGNGGGGNGGGCCCGCGGN

27N00000272727002727N00000000000027N27N

11N111111NN11N11111N11111N11N11211N

0N555555NN005550500N555555N005555050N

CNC C C C C C C C C C C C C C C C C C C C C C T C T N

CNTTTTNTTNTTNTTNTTNTTNTTNTTNTTNTTNTTNTTNTTNTTNT

GNAAAAANNGGAAAGAGGNAAAAAGAAANGGGAANAANAAGGN

TNCCCCCNNTTTCCTTCTTCTTCTTCTTCTTCTTCTTCTTCTTCT

ANTTTTTTNTTAAATTAATAANTTATAATTNAAAAATTTTATAN

0N111111NN00111001000N1101011N0001111111010N

3N3030300NN333303333N303333N333333N3333330030033

GNCCCCCNCNGGCCGGNCCCGCCCGCCNGGCCNCCCNCCCNCCCGCGN















|                                                                                                                                                                                  |                                                                                                                                                                                  |                                                                                                                                                                                       |                                                                                                                                                                                  |                                                                                                                                                                        |                                                                                                                                                                                  |                                                                                                                                                                                       |                                                                                                                                                                                            |                                                                                                                                                                        |                                                                                                                                                                             |                                                                                                                                                                             |                                                                                                                                                                             |
|----------------------------------------------------------------------------------------------------------------------------------------------------------------------------------|----------------------------------------------------------------------------------------------------------------------------------------------------------------------------------|---------------------------------------------------------------------------------------------------------------------------------------------------------------------------------------|----------------------------------------------------------------------------------------------------------------------------------------------------------------------------------|------------------------------------------------------------------------------------------------------------------------------------------------------------------------|----------------------------------------------------------------------------------------------------------------------------------------------------------------------------------|---------------------------------------------------------------------------------------------------------------------------------------------------------------------------------------|--------------------------------------------------------------------------------------------------------------------------------------------------------------------------------------------|------------------------------------------------------------------------------------------------------------------------------------------------------------------------|-----------------------------------------------------------------------------------------------------------------------------------------------------------------------------|-----------------------------------------------------------------------------------------------------------------------------------------------------------------------------|-----------------------------------------------------------------------------------------------------------------------------------------------------------------------------|
| G<br>A<br>A<br>A<br>G<br>N<br>A<br>N<br>N<br>N<br>N<br>A<br>N<br>N<br>A<br>A<br>A<br>N<br>G<br>A<br>A                                                                            | 6<br>0<br>0<br>0<br>0<br>72<br>N<br>N<br>0<br>N<br>N<br>N<br>N<br>0<br>N<br>N<br>0<br>0<br>0<br>N<br>6<br>0<br>0                                                                 | 17<br>0<br>0<br>0<br>0<br>N<br>N<br>0<br>N<br>N<br>N<br>N<br>0<br>N<br>N<br>0<br>0<br>0<br>N<br>17<br>0<br>0                                                                          | C<br>A<br>A<br>A<br>A<br>-<br>N<br>A<br>N<br>N<br>N<br>N<br>A<br>N<br>N<br>A<br>A<br>A<br>N<br>C<br>A<br>A                                                                       | A<br>G<br>G<br>G<br>G<br>-<br>N<br>G<br>N<br>N<br>N<br>N<br>G<br>N<br>N<br>G<br>G<br>N<br>G<br>G                                                                       | T<br>G<br>G<br>G<br>G<br>-<br>N<br>G<br>N<br>N<br>N<br>N<br>G<br>N<br>N<br>G<br>G<br>N<br>T<br>G<br>G                                                                            | C<br>C<br>C<br>C<br>C<br>-<br>N<br>C<br>N<br>N<br>N<br>N<br>C<br>N<br>N<br>C<br>C<br>C<br>N<br>T<br>C<br>C                                                                            | A<br>A<br>A<br>A<br>A<br>G<br>N<br>A<br>N<br>N<br>N<br>N<br>A<br>N<br>N<br>A<br>A<br>A<br>N<br>G<br>A<br>A                                                                                 | T<br>T<br>T<br>T<br>T<br>C<br>N<br>T<br>N<br>N<br>N<br>N<br>T<br>N<br>N<br>T<br>T<br>T<br>N<br>T<br>T                                                                  | G<br>G<br>G<br>G<br>G<br>A<br>N<br>G<br>N<br>N<br>N<br>N<br>G<br>N<br>N<br>G<br>G<br>N<br>G<br>G                                                                            | T<br>G<br>G<br>G<br>G<br>T<br>N<br>G<br>N<br>N<br>N<br>N<br>G<br>N<br>N<br>G<br>G<br>N<br>T<br>G<br>G                                                                       | A<br>A<br>A<br>A<br>A<br>G<br>N<br>A<br>N<br>N<br>N<br>N<br>A<br>N<br>N<br>A<br>A<br>A<br>N<br>A<br>A                                                                       |
| A<br>N<br>N<br>G<br>N<br>A<br>N<br>N<br>N<br>N<br>N<br>N<br>N<br>N<br>A<br>A<br>G<br>A<br>A<br>N<br>N<br>A<br>N<br>G<br>A<br>N<br>A<br>G<br>A<br>A<br>A<br>A<br>N<br>A<br>G<br>A | 0<br>N<br>N<br>6<br>N<br>0<br>N<br>N<br>N<br>N<br>N<br>N<br>N<br>N<br>0<br>0<br>6<br>0<br>0<br>N<br>N<br>0<br>N<br>6<br>0<br>N<br>0<br>6<br>0<br>0<br>0<br>0<br>N<br>0<br>6<br>0 | 0<br>N<br>N<br>17<br>N<br>0<br>N<br>N<br>N<br>N<br>N<br>N<br>N<br>N<br>0<br>0<br>17<br>0<br>0<br>N<br>N<br>0<br>N<br>17<br>0<br>N<br>0<br>17<br>0<br>0<br>0<br>0<br>N<br>0<br>17<br>0 | A<br>N<br>N<br>C<br>N<br>A<br>N<br>N<br>N<br>N<br>N<br>N<br>C<br>N<br>N<br>A<br>A<br>C<br>A<br>A<br>N<br>N<br>A<br>N<br>C<br>A<br>N<br>A<br>C<br>A<br>A<br>A<br>N<br>A<br>C<br>A | G<br>N<br>N<br>G<br>N<br>G<br>N<br>N<br>N<br>N<br>N<br>N<br>G<br>N<br>N<br>G<br>A<br>G<br>N<br>N<br>G<br>N<br>G<br>N<br>G<br>G<br>G<br>G<br>G<br>G<br>N<br>G<br>A<br>G | G<br>N<br>N<br>T<br>N<br>G<br>N<br>N<br>N<br>N<br>N<br>N<br>T<br>N<br>N<br>G<br>G<br>T<br>G<br>N<br>N<br>G<br>N<br>T<br>G<br>N<br>G<br>T<br>G<br>G<br>G<br>G<br>N<br>G<br>T<br>G | C<br>N<br>N<br>T<br>N<br>C<br>N<br>N<br>N<br>N<br>N<br>N<br>T<br>N<br>N<br>C<br>C<br>C<br>C<br>C<br>C<br>N<br>N<br>C<br>N<br>T<br>C<br>N<br>C<br>T<br>C<br>C<br>C<br>C<br>C<br>N<br>C | A<br>N<br>N<br>G<br>N<br>A<br>N<br>N<br>N<br>N<br>N<br>N<br>G<br>N<br>N<br>A<br>A<br>A<br>A<br>A<br>N<br>N<br>A<br>N<br>G<br>A<br>N<br>A<br>G<br>A<br>A<br>A<br>A<br>A<br>N<br>A<br>N<br>A | T<br>N<br>N<br>T<br>N<br>T<br>N<br>N<br>N<br>N<br>N<br>N<br>T<br>N<br>N<br>T<br>T<br>T<br>T<br>T<br>N<br>T<br>N<br>T<br>T<br>T<br>T<br>T<br>T<br>T<br>T<br>T<br>N<br>T | G<br>N<br>N<br>G<br>N<br>G<br>N<br>N<br>N<br>N<br>N<br>N<br>G<br>N<br>N<br>G<br>G<br>G<br>G<br>N<br>N<br>G<br>N<br>G<br>N<br>G<br>G<br>G<br>G<br>G<br>G<br>N<br>G<br>N<br>G | G<br>N<br>N<br>T<br>N<br>G<br>N<br>N<br>N<br>N<br>N<br>N<br>T<br>N<br>N<br>G<br>G<br>T<br>G<br>N<br>N<br>G<br>N<br>T<br>G<br>N<br>G<br>T<br>G<br>G<br>G<br>N<br>G<br>N<br>G | A<br>N<br>N<br>A<br>N<br>A<br>N<br>N<br>N<br>N<br>N<br>N<br>A<br>N<br>N<br>A<br>A<br>A<br>A<br>A<br>N<br>N<br>A<br>N<br>A<br>A<br>A<br>A<br>A<br>A<br>A<br>N<br>A<br>N<br>A |

A A A A A A A N A A A G A N N N A A N G N N G A A N G N G A G A A N N N A A N A G A A G A A N N N A A A

G G G T G G G N T G G T G N N N G N T N N N T G T N N T N N T G T N N N G G N G T T G G T N N N G G G

G G G G G G N G G A G N N N G N A N N N A G N N A G G N N A G G N N N G G A G G G A G G N N N G G G

T T T T T T N T T T C T N N N T T N C N N N C T T N N C N N C T T T N N N T T N T C T T T C T T N N N T T T

A A A A A A A N G A A G A N N N A A N G N N N G A A N N G N N G A G A A N N N A A N A G A A G A G N N N A A A

C C C C C C N T C C - C N N N C C N - N N N - C C N N - N N - C - C C N N N C C N C - T C C - C T N N N C C C C

G G G T T G G N T G G - G N N N G G N - N N N - G T N N - N N - G - G T N N N G G N G - T G G - G T N N N G G G

G G G A A G N G G G - G N N N G G N - N N N - G A N N - N N - G - G A N N N G G N G - G G G - G G N N N G G G

A A A C C A A N C A A - A N N N A A N - N N N - A C N N - N N - A - A C N N N A A N A - C A A - A C N N N A A A

0 0 0 17 17 0 0 N 17 0 0 N 0 0 N N N 0 0 N N N N N 0 17 N N N N N 0 0 N 0 0 N 17 0 0 N 0 18 N N N 0 0 0

0 0 0 6 6 0 0 N 6 0 0 72 0 N N N 0 0 N 72 N N N 72 0 6 N N 72 N N 72 0 72 0 6 N N N 0 0 N 0 72 6 0 0 72 0 6 N N N 0 0 0

A A A G G A A N G A A G A N N N A A N G N N N G A G N N G N N G A G A G N A N A A N A G G A A G A G N N N A A A

N A N G G G A A G G G N N G A A A - N N G A N G N N A A N A G G G A A G N G G A A A N N N A N A G A G N A A A N N

N 0 N 6 6 72 0 0 72 6 6 N N 72 0 0 0 N N N 72 0 N 72 N N 0 0 N 0 72 72 0 0 72 N 72 0 0 0 N N N 0 N 0 6 0 6 N 0 0 N N

N 0 N 17 17 N 0 0 N 17 17 N N N 0 0 0 17 N N N 0 0 N N N 0 0 N N N 0 0 17 0 17 N 0 0 N N

N A N C C - A A - C C N N - A A A C N N - A N - N N A A N A - - A A - N - - A A A N N N A N A C A C N A A A N N

N G N A A - G G - G A N N - G G G N N - G N - N N G G N G - - G G - N - - G G N N N G N G T G T N G G N N

N G N T T - G G - T T N N - G G G T N N - G N - N N G G N G - - G G - N - - G G N N N G N G T G T N G G N N

N C N C C - C C - T C N N - C C C T N N - C N - N N C C N C - - C C - N - - C C C N N N C N C T C T N C C C N N

N A N A A G A A G G A N N G A A A G N N G A N G N N A A N A G G G A A G N G G A A A N N N A N A G A G N A A A N N

N T N T T C T T C T T N N C T T T N N C T N C N N T T N T C C C T T C N C C T T T N N N T T T T T N T T T N N

N G N G G A G G A G N N A G G G N N A G N A N N G N G A A A G G A N A G G N N N G N G G G N G G N N

N G N T T T G G T T T N N T G G G T N N T G N T N N G N G T T T G G T N T T G G N N N G N G T G T N G G N N

N A N A A G A A G A A N N G A A A A N N G A N G N N A A N A G G G A A G N G G A A N N N A N A A A A A A N N



| AL1_17                                                                                                                                                                                                                                                                                    | AL1_18                                                                                                                                                                                                                                                      | AL1_19                                                                                                                                                                                                    | AL1_20                                                                                                                                                                                                    | AL1_21                                                                                                                                                                                     | AL1_22                                                                                                                                                                                                                                            | AL1_23                                                                                                                                                                                                                                                      | AL1_24                                                                                                                                                                                                                                                                                                        | AL1_25                                                                                                                                                                                                                                  | AL1_26                                                                                                                                                                                                                                                                     | AL1_27                                                                                                                                                                                                                                            |
|-------------------------------------------------------------------------------------------------------------------------------------------------------------------------------------------------------------------------------------------------------------------------------------------|-------------------------------------------------------------------------------------------------------------------------------------------------------------------------------------------------------------------------------------------------------------|-----------------------------------------------------------------------------------------------------------------------------------------------------------------------------------------------------------|-----------------------------------------------------------------------------------------------------------------------------------------------------------------------------------------------------------|--------------------------------------------------------------------------------------------------------------------------------------------------------------------------------------------|---------------------------------------------------------------------------------------------------------------------------------------------------------------------------------------------------------------------------------------------------|-------------------------------------------------------------------------------------------------------------------------------------------------------------------------------------------------------------------------------------------------------------|---------------------------------------------------------------------------------------------------------------------------------------------------------------------------------------------------------------------------------------------------------------------------------------------------------------|-----------------------------------------------------------------------------------------------------------------------------------------------------------------------------------------------------------------------------------------|----------------------------------------------------------------------------------------------------------------------------------------------------------------------------------------------------------------------------------------------------------------------------|---------------------------------------------------------------------------------------------------------------------------------------------------------------------------------------------------------------------------------------------------|
| A<br>A<br>A<br>G<br>N<br>G<br>N<br>A<br>G<br>N<br>G<br>N<br>G<br>N<br>N<br>N<br>G<br>N<br>A<br>A<br>N<br>G<br>N<br>A<br>A<br>N<br>N<br>G<br>N<br>G<br>N<br>N<br>N<br>A<br>A<br>N<br>G<br>N<br>N<br>N<br>N<br>A<br>A<br>N<br>G<br>N<br>N<br>N<br>A<br>A<br>N<br>G<br>N<br>G<br>A<br>A<br>N | C<br>C<br>C<br>T<br>T<br>N<br>T<br>N<br>C<br>T<br>T<br>N<br>T<br>T<br>N<br>T<br>N<br>N<br>T<br>N<br>N<br>C<br>C<br>N<br>T<br>T<br>N<br>C<br>C<br>N<br>N<br>T<br>T<br>N<br>T<br>N<br>N<br>N<br>C<br>C<br>N<br>T<br>N<br>T<br>T<br>N<br>T<br>N<br>T<br>C<br>N | G<br>G<br>A<br>G<br>N<br>G<br>N<br>A<br>A<br>N<br>A<br>G<br>N<br>N<br>A<br>N<br>N<br>G<br>N<br>A<br>A<br>N<br>N<br>A<br>N<br>N<br>N<br>G<br>N<br>A<br>A<br>N<br>N<br>A<br>N<br>N<br>A<br>N<br>A<br>G<br>N | T<br>T<br>A<br>T<br>N<br>T<br>N<br>T<br>A<br>A<br>N<br>A<br>T<br>N<br>N<br>N<br>A<br>N<br>N<br>T<br>T<br>N<br>A<br>A<br>N<br>T<br>N<br>N<br>N<br>T<br>T<br>N<br>A<br>N<br>N<br>A<br>N<br>A<br>T<br>T<br>N | T<br>T<br>A<br>T<br>N<br>T<br>N<br>T<br>A<br>A<br>N<br>A<br>T<br>N<br>N<br>N<br>A<br>N<br>N<br>T<br>T<br>N<br>A<br>A<br>N<br>T<br>T<br>N<br>A<br>N<br>N<br>A<br>N<br>N<br>A<br>T<br>T<br>N | 2<br>0<br>0<br>2<br>0<br>N<br>0<br>N<br>0<br>2<br>2<br>N<br>2<br>0<br>N<br>0<br>N<br>N<br>N<br>2<br>N<br>N<br>0<br>N<br>2<br>N<br>0<br>N<br>N<br>N<br>2<br>N<br>2<br>N<br>N<br>2<br>N<br>N<br>2<br>N<br>2<br>N<br>2<br>N<br>2<br>N<br>2<br>0<br>N | A<br>A<br>A<br>C<br>A<br>N<br>A<br>N<br>A<br>C<br>C<br>N<br>C<br>A<br>N<br>A<br>N<br>N<br>C<br>N<br>N<br>A<br>A<br>N<br>C<br>C<br>N<br>A<br>N<br>A<br>N<br>N<br>C<br>A<br>N<br>C<br>N<br>N<br>N<br>A<br>A<br>N<br>C<br>N<br>N<br>C<br>N<br>N<br>C<br>A<br>N | G<br>G<br>G<br>C<br>G<br>N<br>G<br>N<br>G<br>C<br>C<br>N<br>C<br>G<br>N<br>G<br>N<br>N<br>N<br>N<br>G<br>N<br>C<br>C<br>N<br>G<br>N<br>C<br>C<br>N<br>G<br>N<br>C<br>C<br>N<br>N<br>N<br>N<br>G<br>N<br>C<br>C<br>N<br>N<br>N<br>N<br>N<br>N<br>N<br>G<br>N<br>C<br>C<br>N<br>C<br>C<br>N<br>C<br>C<br>G<br>N | T<br>T<br>T<br>C<br>T<br>N<br>C<br>N<br>T<br>C<br>C<br>N<br>C<br>T<br>N<br>C<br>N<br>N<br>C<br>N<br>N<br>T<br>T<br>N<br>C<br>C<br>N<br>T<br>N<br>N<br>C<br>C<br>N<br>N<br>N<br>T<br>T<br>N<br>C<br>C<br>N<br>N<br>C<br>C<br>T<br>T<br>N | 4<br>4<br>4<br>0<br>4<br>N<br>0<br>N<br>N<br>0<br>N<br>N<br>0<br>N<br>N<br>0<br>N<br>N<br>N<br>N<br>4<br>N<br>4<br>N<br>0<br>N<br>4<br>N<br>N<br>N<br>0<br>N<br>N<br>N<br>N<br>4<br>N<br>0<br>N<br>N<br>N<br>0<br>N<br>N<br>N<br>0<br>N<br>N<br>0<br>N<br>N<br>0<br>4<br>N | A<br>A<br>A<br>G<br>A<br>N<br>A<br>N<br>N<br>G<br>N<br>G<br>N<br>G<br>N<br>N<br>G<br>N<br>N<br>N<br>A<br>A<br>N<br>G<br>N<br>A<br>A<br>N<br>N<br>G<br>A<br>N<br>G<br>N<br>N<br>N<br>A<br>A<br>N<br>G<br>N<br>N<br>G<br>N<br>G<br>N<br>G<br>A<br>N |

G G G G G A N G N N N G N N G G G N G G G  
G N N G N G N N N N N G N N G G G G N N G N G G G G G G N G N G  
T T T T C N T N N N T N N T T T N T T T  
T N N T N T N N N N T N N T T T T N N T T T T T T T T T N T N T  
G A A A G N A N N N A N N A A A N G A A  
A N N G N A N N N G N N A G A A N N A N A G A A A A N A  
T A A N A T N A N N A N N A A A N T A A  
T N N T N A N N N T N N A A T A A N N A N T A N A T A A A N A  
T A A N A T N A N N A N N A A A N T A A  
T N N T N A N N N T N N A A T A A N N A N T A N A T A A A N A  
0 2 2 N 2 0 N 2 N N N 2 N N 2 2 2 N 0 2 2  
0 N N 0 N 2 N N N N 0 N N 2 2 0 2 2 N N 2 N 0 2 2 2 2 2 N 2  
A C C N C A N C N N N C N N C C C N A C C  
A N N A N C N N N N A N N C C A C C N N C N A C N C A C C C N C  
G C C N C G N C N N N C N N C C C N G C C  
G N N G N C N N N N G N N C C G C C N N C N G C C C C C C N C  
T C C N C T N C N N N C N N C C C N C C C  
T N N C N C N N N N C N N C C T C C N N C N C C C C C C N C  
4 0 0 N 0 4 N 0 N N N 0 N N 0 0 4 0 0 N N 0 N 0 0 0 0 0 0 0  
4 N N 0 N 0 N N N N 0 N N 0 0 4 0 0 N N 0 N 0 0 0 0 0 0 0  
A N G N G A N G N N N G N N G A G G N N G N A G N G A G G G N G  
A N N A N G N N N A N N G G A G G N N G N A G N G A G G G N G

G G G A G G N A G A G N N G N A N N A G A N A N A G A N A N N G G G

0 0 4 0 0 0 0 0 4 0 N N 0 0 N 4 N N 4 0 4 N 4 N N 0 0 4 4 0 4 N 0 N N 0 0 0 0

C C C T C C C N C C C T C N N C C N T N N T C T N N T C T N T N N C C N C T T C C T N C N N C C C

C C C G G C C N G C C G C C N N C C N G N N G C G N G N N C C N C G C C G N G N N C C C

C C C A A C C N A C C A C N N N C C N A N N A C A N A N N C C N C A A C C A N A N N C C C

2 2 2 0 0 2 2 N 0 2 2 0 2 N N N 2 2 N 0 N N 0 2 0 N 0 N N 2 2 N 2 0 0 2 2 0 2 0 N N 2 2 2

A A A T T A A N T A A T A N N N A A N T N N T A T N T N N A A N A T T A A T A T N N A A A

A A A T T A A N T A A T A N N N A A N T N N T A T N T N N A A N A T T A A T A T N N A A A

A A A G G A A N G A A G A N N N A A N G N N G A G N N G A N A G G A A G A G N N N A A A

T T T T T T N T T T C T N N N T T N C N N C T T N N C N N C T T N N N T T N T C T T T C T T N N T T T

G G G G G N G G A G N N N G N A N N N A G G N N A G G N N A N A G A G G A G G N N N G G G



N  
G  
N  
G  
G  
A  
G  
G  
A  
G  
G  
N  
N  
A  
G  
G  
G  
N  
N  
A  
G  
N  
A  
N  
N  
G  
G  
N  
G  
A  
A  
A  
G  
G  
A  
N  
A  
A  
G  
G  
N  
N  
N  
G  
G  
G  
G  
G  
G  
G  
G  
N  
N

N  
T  
N  
T  
T  
C  
T  
T  
C  
T  
T  
N  
N  
C  
T  
T  
T  
T  
N  
N  
C  
T  
N  
C  
N  
N  
T  
T  
N  
T  
C  
C  
C  
T  
T  
C  
N  
C  
C  
T  
T  
T  
N  
N  
N  
T  
N  
T  
T  
T  
T  
N  
T  
T  
T  
N  
N

N  
A  
N  
G  
G  
G  
A  
A  
G  
G  
N  
N  
G  
A  
A  
A  
G  
N  
N  
G  
A  
N  
G  
N  
N  
A  
A  
N  
A  
G  
G  
A  
A  
G  
N  
G  
A  
A  
A  
N  
N  
N  
A  
N  
A  
G  
A  
G  
N  
A  
A  
A  
N  
N

N  
A  
N  
T  
T  
T  
A  
A  
T  
T  
T  
N  
N  
T  
A  
A  
A  
T  
N  
N  
T  
A  
N  
T  
N  
N  
A  
A  
N  
A  
T  
T  
A  
A  
N  
N  
N  
A  
N  
A  
T  
A  
T  
N  
A  
A  
A  
N  
N

N  
A  
N  
T  
T  
T  
A  
A  
T  
T  
T  
N  
N  
T  
A  
A  
A  
T  
N  
N  
T  
A  
N  
T  
N  
N  
A  
A  
N  
A  
T  
T  
A  
A  
N  
N  
N  
A  
N  
A  
T  
A  
T  
N  
A  
A  
A  
N  
N

N  
2  
N  
0  
0  
0  
2  
2  
0  
0  
0  
N  
N  
0  
2  
2  
2  
0  
N  
N  
0  
2  
N  
N  
0  
N  
N  
2  
2  
N  
2  
0  
0  
0  
2  
2  
0  
N  
0  
0  
2  
2  
N  
N  
N  
2  
N  
2  
0  
2  
0  
N  
2  
2  
N  
N

N  
C  
N  
A  
A  
A  
C  
C  
A  
A  
A  
N  
N  
A  
C  
C  
C  
A  
N  
N  
A  
C  
N  
A  
N  
N  
C  
C  
N  
C  
A  
A  
A  
C  
C  
A  
N  
A  
A  
C  
C  
C  
N  
N  
N  
C  
N  
C  
A  
C  
A  
N  
C  
C  
C  
N  
N

N  
C  
N  
G  
G  
G  
C  
C  
G  
G  
G  
N  
N  
G  
C  
C  
C  
G  
N  
N  
G  
C  
N  
G  
N  
N  
C  
C  
N  
C  
G  
G  
C  
C  
G  
G  
C  
C  
G  
N  
G  
C  
C  
C  
N  
N  
N  
C  
N  
C  
G  
C  
G  
N  
C  
C  
C  
N  
N

N  
C  
N  
T  
T  
T  
C  
C  
T  
C  
T  
N  
N  
T  
C  
C  
C  
C  
N  
N  
T  
C  
N  
T  
N  
N  
C  
C  
N  
C  
T  
T  
T  
C  
C  
T  
N  
T  
T  
C  
C  
C  
N  
N  
N  
C  
N  
C  
C  
C  
C  
C  
N  
N

N  
0  
N  
4  
4  
4  
0  
4  
0  
4  
N  
N  
4  
0  
0  
0  
0  
N  
N  
4  
0  
N  
4  
N  
N  
0  
N  
0  
4  
4  
4  
0  
4  
N  
4  
4  
0  
0  
N  
N  
N  
0  
N  
0  
0  
0  
N  
N

N  
G  
N  
A  
A  
A  
G  
G  
A  
A  
A  
N  
N  
A  
G  
G  
G  
A  
N  
N  
A  
G  
N  
A  
N  
N  
G  
G  
N  
G  
A  
A  
A  
G  
G  
A  
N  
A  
A  
G  
G  
N  
N  
N  
G  
G  
A  
G  
A  
N  
G  
G  
N  
N

N N N N A G G N G A G N G G A N N G N G G G G G G G N A G G A G N G G G G N G G N G G N G G N G G N

N N N N C T T N T C T N T T C N N T N T T T T N T T T T N C T T C T N T T T T T N T T N T T N T T N T T N

N N N N G A G N A G A N A G N N A N G A A A N A A A N G A G G A N A A A A N A N G A N A N A G N A A N

N N N N T A T N A T A N A T T N N A N T A A A N A A A N T A T T A N A A A A N T A N A N A T N A A N

N N N N T A T N A T A N A T T N N A N T A A A N A A A N T A T T A N A A A A N A N A T N A A N

N N N N 0 2 0 N 2 0 2 N 2 0 0 N N 2 N 0 2 2 2 N 2 2 2 N 0 2 0 0 2 N 2 2 2 N 2 2 N 0 2 N 2 0 N 2 2 N

N N N N A C A N C A C N C A A N N C N A C C C N C C C C N A C A A C N C C C C N A C N C N C A N C C N

N N N N G C G N C G C N C G N N C N G C C C C C C C C C C N G C G G C N C C C C C N C N C N C G N C C N

N N N N T C T N C T C N C C T N N C N T C C C N C C C C C N T C T T C N C C C C C C N C C N C C N C C N

N N N N 4 0 4 N 0 4 0 N 0 0 4 N N 0 N 4 0 0 0 N 0 0 0 0 N 4 0 4 4 0 N 0 0 0 0 0 N 0 0 0 0 0 N

N N N N A G A N G A G N G A A N N G N A G G N G G G N A G A A G N G G G G N G N A G N G N G A N G N N



|   |   |   |   |   |   |   |   |   |   |   |   |   |   |   |   |   |   |   |   |   |
|---|---|---|---|---|---|---|---|---|---|---|---|---|---|---|---|---|---|---|---|---|
| 4 | 7 | G | 0 | C | G | 0 | A | G | G | 0 | C | T | T | C | G | 0 | T | T | C | G |
| N | N | N | N | C | T | 0 | A | A | G | 0 | T | T | T | T | G | 0 | T | T | T | C |
| 0 | 0 | A | 1 | T | G | 0 | G | G | G | 3 | T | T | T | C | T | 3 | C | T | T | G |
| 0 | 0 | N | 1 | C | G | 0 | G | G | G | 3 | T | T | T | T | G | 3 | T | T | T | G |
| 4 | 7 | N | 0 | T | G | 0 | A | A | G | 3 | T | T | T | T | G | 3 | T | T | T | G |
| N | N | N | N | T | G | 0 | G | G | G | 3 | T | T | T | T | G | 3 | T | T | T | G |
| 0 | 0 | A | 1 | T | G | 0 | A | A | G | 3 | T | T | T | T | G | 3 | T | T | T | G |
| 0 | 0 | N | 1 | C | G | 0 | G | G | G | 3 | T | T | T | T | G | 3 | T | T | T | G |
| 0 | 0 | N | 0 | T | G | 0 | A | A | G | 3 | T | T | T | T | G | 3 | T | T | T | G |
| 0 | 0 | N | 1 | T | G | 0 | G | G | G | 3 | T | T | T | T | G | 3 | T | T | T | G |
| 0 | 0 | N | 1 | C | G | 0 | A | A | G | 3 | T | T | T | T | G | 3 | T | T | T | G |
| 0 | 0 | N | 1 | T | G | 0 | A | A | G | 3 | T | T | T | T | G | 3 | T | T | T | G |
| 0 | 0 | N | 1 | C | G | 0 | A | A | G | 3 | T | T | T | T | G | 3 | T | T | T | G |
| 0 | 0 | N | 1 | T | G | 0 | A | A | G | 3 | T | T | T | T | G | 3 | T | T | T | G |
| 0 | 0 | N | 1 | C | G | 0 | A | A | G | 3 | T | T | T | T | G | 3 | T | T | T | G |
| 0 | 0 | N | 1 | T | G | 0 | A | A | G | 3 | T | T | T | T | G | 3 | T | T | T | G |
| 0 | 0 | N | 1 | C | G | 0 | A | A | G | 3 | T | T | T | T | G | 3 | T | T | T | G |
| 0 | 0 | N | 1 | T | G | 0 | A | A | G | 3 | T | T | T | T | G | 3 | T | T | T | G |
| 0 | 0 | N | 1 | C | G | 0 | A | A | G | 3 | T | T | T | T | G | 3 | T | T | T | G |
| 0 | 0 | N | 1 | T | G | 0 | A | A | G | 3 | T | T | T | T | G | 3 | T | T | T | G |
| 0 | 0 | N | 1 | C | G | 0 | A | A | G | 3 | T | T | T | T | G | 3 | T | T | T | G |



N 0 N 4 4 4 0 0 4 0 4 N N 4 0 0 0 0 N N 4 0 N 4 N N 0 0 N N 4 4 4 0 0 4 N 4 4 0 0 0 N N 0 0 0 0 0 0 0 0 0 0 0 N  
N 0 N 7 7 7 0 0 7 0 7 N N 7 0 0 0 0 N N 7 0 N 7 N N 0 0 N N 7 7 7 0 0 7 N 7 7 0 0 0 N N 0 0 0 0 0 0 0 0 0 0 0  
N A N G G G A A G G N N G A A A G N N G A N G N N A A N N G G A A G N G A A A N N N A N A G A G N A A A N N  
N 1 N 0 0 0 1 1 0 1 0 N N 0 1 1 1 N N 0 1 N 0 N N 1 N N 0 0 1 1 0 N 0 0 1 1 1 N N 1 1 1 1 1 1 1  
N C C C N C N C C C N C C C N T N N C C N N N C N C T T T N T C C C C C N C C T T C N T C N C N N N N C C  
N G G G N G N G G N G G N G G N G G N G G G G G G G G G G G G G G G G G G G G G G G T G G N G N N N N G G  
N 3 0 3 N 0 N 0 3 N 0 3 N 0 3 N 0 3 N 3 0 N 3 N 3 N 0 0 0 0 3 3 3 3 3 3 3 3 N 0 0 0 0 3 3 3 3 3 3 3 3 3 3 3 3  
N G A G N A N G G N A G N G G N A N G A N A G G G A G G G A G G G A G G G A G G N G N N N N N A G  
N A G A N G N G A N G A N G A N A G N A N G N G G G G G G A A A A N G G G G A G G G G N A N N N N G A  
N 3 0 3 N 0 N 3 3 N 0 3 3 N 3 3 N 3 3 0 N 3 3 3 3 3 0 3 3 3 3 3 3 3 3 3 3 3 3 3 3 3 3 3 3 3 3 3  
N T C T N C N T T T N C T N T T T N C N T N C N C T T T T T C T T T T T N C C T T T T C C C N T T T T C T T T T N T N N N C T  
N C T C N T N T C N T C N T C N T C N C T N C N T N T T T T C C C C N T T T T T T T T T T T T C N N N N T C  
N T C T N C N G T N C T N G T N T C N T N G N C G G G G C T T T T N C C G G G C T G G G N T N N N N C G



| AL2_10 | AL2_11 | AL2_12 | AL2_13 | AL2_14 | AL2_15 | AL2_16 | AL2_17 | AL3_1 | AL3_2 | AL3_3 | AL3_4 |
|--------|--------|--------|--------|--------|--------|--------|--------|-------|-------|-------|-------|
| A      | 6      | G      | C      | A      | G      | 8      | C      | 1     | 1     | 4     | N     |
| A      | 6      | G      | C      | A      | G      | 0      | C      | N     | N     | N     | N     |
| G      | 0      | G      | C      | T      | A      | 8      | G      | 1     | 1     | 4     | C     |
| A      | 6      | G      | C      | A      | N      | 0      | C      | 1     | 1     | 4     | G     |
| N      | N      | N      | N      | N      | G      | N      | N      | N     | N     | N     | N     |
| G      | 6      | T      | T      | T      | A      | 8      | C      | 1     | 1     | 4     | G     |
| A      | 0      | G      | C      | T      | A      | 8      | G      | N     | N     | 0     | N     |
| A      | 6      | G      | C      | A      | N      | 0      | C      | 1     | 1     | 4     | G     |
| A      | 6      | G      | C      | A      | G      | 0      | C      | 0     | 0     | 4     | G     |
| A      | 0      | G      | C      | T      | A      | 8      | G      | 0     | 1     | 4     | G     |
| A      | 6      | C      | C      | T      | G      | 8      | C      | N     | N     | N     | N     |
| G      | 6      | T      | T      | T      | G      | 8      | C      | N     | N     | N     | N     |
| N      | N      | N      | N      | N      | A      | N      | N      | 1     | 1     | 4     | G     |
| A      | 0      | G      | C      | T      | A      | 8      | G      | N     | N     | N     | N     |
| A      | 0      | N      | N      | N      | A      | N      | N      | 1     | 1     | 4     | G     |
| A      | 0      | N      | N      | N      | A      | N      | N      | N     | N     | N     | N     |
| A      | 6      | G      | C      | A      | G      | 0      | C      | N     | N     | N     | N     |
| A      | 0      | N      | N      | N      | A      | N      | N      | 1     | 1     | 4     | C     |
| N      | N      | N      | N      | N      | N      | N      | N      | N     | 1     | 4     | N     |
| N      | N      | N      | N      | N      | N      | N      | N      | N     | N     | N     | N     |
| A      | 0      | G      | C      | T      | A      | 8      | G      | N     | N     | N     | N     |
| N      | N      | N      | N      | N      | A      | N      | N      | 1     | 1     | 4     | G     |
| G      | 6      | C      | C      | T      | A      | 8      | C      | 1     | 1     | 4     | G     |
| A      | 6      | G      | C      | A      | G      | 0      | C      | N     | N     | 4     | N     |
| A      | 6      | G      | C      | A      | G      | 0      | C      | 1     | 1     | 4     | G     |
| A      | 6      | G      | C      | A      | G      | 0      | C      | 1     | 1     | 4     | G     |
| A      | 6      | G      | C      | A      | G      | 0      | C      | N     | N     | 0     | N     |
| A      | 0      | G      | C      | T      | A      | 8      | G      | N     | N     | N     | N     |
| A      | 0      | N      | N      | N      | A      | N      | N      | 1     | 0     | N     | N     |
| A      | 0      | N      | N      | N      | A      | N      | N      | N     | N     | N     | N     |
| A      | 6      | G      | C      | A      | G      | 0      | C      | N     | N     | N     | N     |
| A      | 0      | N      | N      | N      | A      | N      | N      | 1     | 1     | 4     | G     |
| A      | 0      | N      | N      | N      | A      | N      | N      | 1     | 1     | 4     | G     |
| A      | 0      | N      | N      | N      | A      | N      | N      | N     | N     | N     | N     |
| A      | 0      | N      | N      | N      | A      | N      | N      | 1     | 1     | 4     | G     |
| A      | 0      | N      | N      | N      | A      | N      | N      | N     | N     | N     | N     |
| A      | 0      | N      | N      | N      | A      | N      | N      | 1     | 1     | 4     | G     |
| A      | 0      | N      | N      | N      | A      | N      | N      | N     | N     | N     | N     |
| A      | 6      | G      | C      | A      | G      | 0      | C      | N     | 0     | 4     | C     |
| A      | 0      | N      | N      | N      | A      | N      | N      | 1     | 0     | 0     | G     |
| A      | 6      | G      | C      | A      | G      | 0      | C      | 1     | 1     | 4     | G     |
| A      | 6      | G      | C      | A      | G      | 0      | C      | 1     | 1     | 4     | G     |
| A      | 6      | G      | C      | A      | G      | 0      | C      | 1     | 1     | 4     | G     |
| A      | 0      | N      | N      | N      | A      | N      | N      | 1     | 1     | 4     | G     |
| A      | 0      | N      | N      | N      | A      | N      | N      | N     | N     | N     | N     |
| A      | 6      | G      | C      | A      | G      | 0      | C      | N     | N     | 4     | N     |
| A      | 6      | G      | C      | A      | G      | 0      | C      | 1     | 1     | 4     | N     |
| A      | 6      | G      | C      | A      | G      | 0      | C      | 1     | 1     | 4     | N     |
| A      | 6      | G      | C      | A      | G      | 0      | C      | 1     | 1     | 4     | N     |
| A      | 0      | N      | N      | N      | A      | N      | N      | N     | N     | N     | N     |
| A      | 0      | N      | N      | N      | A      | N      | N      | N     | N     | N     | N     |
| A      | 0      | N      | N      | N      | A      | N      | N      | N     | N     | N     | N     |
| A      | 6      | G      | C      | A      | G      | 0      | C      | N     | N     | 4     | N     |
| A      | 6      | G      | C      | A      | G      | 0      | C      | N     | N     | 4     | N     |
| A      | 6      | G      | C      | A      | G      | 0      | C      | N     | N     | 4     | N     |
| A      | 6      | G      | C      | A      | G      | 0      | C      | N     | N     | 4     | N     |
| A      | 0      | N      | N      | N      | A      | N      | N      | 1     | 1     | 4     | G     |



A A A G G N A G G N A N G A G N G N G A A

6 6 6 6 N 6 6 N 0 N 6 6 N 6 N 6 6 6

G C G T T N G T T N G N T G T N T T C C

C C C T T N C T T N C N T C T N T T C C

A T A T T N A T T N T N T A T N T N T T T

G G G G N G G N A N G G N N N G G

0 8 0 8 8 N 0 8 8 N 8 8 0 8 N N N 8 8

C C C C C N C C C C C N C C C C C G

0 N N 0 N 1 N 1 N 1 N 0 0 0 0 N N 1 0 N

0 N N 1 N 1 N 1 N 0 1 0 0 N N 1 0 N

4 N N 4 N 4 N 4 N 4 N 4 4 4 4 N N 4 4 N

G N N G N G N G N G N G C C G N N G G N

G A G G A G G G G N G G A G G A N G G G G G N G N A N G A

6 0 6 6 6 6 6 6 6 N 6 6 6 0 6 6 6 0 6 N 6 6 6 6 N 6 N 0 N 6 6

T G T T C T T T T N T T T G T T C G T N T T T T T N T N G N G

T C T T C T T T T N T T T C T T C C T N T T T T N T N C N C C

T T T T T T T N T T T T T T T T T T T N T N T N T A

G A G G G G G N G G A G G G A G N G G G G N G N A N G G

8 8 8 8 8 8 8 8 8 N 8 8 8 8 8 8 8 8 8 N 8 8 8 8 N 8 8 0

C G C C G C C C C C C N C C C C G C C C G N C C C C C N C N G N C C

0 1 1 0 1 0 1 1 N 0 0 1 1 0 1 0 0 0 N N 0 N 1 N N N 1 1 N

0 1 1 0 1 0 1 1 N 1 0 1 1 0 1 0 1 N N 0 N 1 N N N 1 1 N 0 N

4 4 4 4 4 4 4 4 N 4 4 4 4 4 4 4 4 N N 4 N 4 N N N 4 4 N 0 N

G G G G G N C G G G G G N N G N C N G N N G G N G N

N N A N N G A N N N A A A A A A N A G A N N N G N A G N N N G N G A N A G N A A A A A A N N N N A A A G N

N N 0 N N 6 0 N N 0 0 0 0 6 0 0 0 0 0 0 6 0 0 6 0 6 6 0 N N N N N 0 0 6 0 N

N N Z N Z G N Z Z G N Z Z G G G C C G N Z N Z N Z N Z N Z T N T G N G C C G N Z N Z G G G

N N C N Z C C N Z C C C C C C N C C N Z N Z N Z N Z N Z C T N C C C C C C N Z C C C

N N T N N T T N N T T T T T T T N T T T N T T T T N A T T A T N N N N T T A T N

N N A N N G A N N A A A A G A A N N N A A N A N G A N A G N G A G G A N N N N A A G A N

N N 8 N N 8 8 8 8 8 8 8 8 8 8 8 8 8 8 8 8 8 8 8 8 8 0 8 8 8 0 8 N

N N G N Z C G N Z G G G G G N G G N N N G N G N C C G N C C G C C G N N N N G G C G N

N N 1 N 1 1 1 1 N 1 N N 1 N N 1 N 1 1 1 1 0 0 1 N 1 1 1 N 0 1 1 N 1 1

N N 1 N 0 1 1 1 0 N 1 N N 0 N 1 0 N 1 N 0 1 1 0 0 1 N 1 1 0 1 1 1 N 1 1

N N 4 N 0 4 4 0 N N 4 N N N 0 N N 4 4 4 N 4 0 4 4 0 4 4 4 4 4 4 4 4 4 4

N N C N Z G G G Z N Z N Z N Z G G Z N Z G G Z N Z G G Z N Z G G Z N Z G G Z N Z G G Z N Z G

N A A A N A N G A N A A N G A N A A N G N A G G G G G A A A A A N A A G G A A G G A G G N A N N N N A A

0 0 6 0 0 6 N 6 0 N 6 0 N 6 0 N 6 0 N 6 0 N 6 6 6 6 6 6 0 0 0 0 0 0 N 6 6 6 6 0 6 6 6 6 6 N 0 N N N N 6 0

G G G G G N T G N G G N T G N G N G N G N G T T T T T G G G G N G G T T T G T T C T T N G N N N G

C C C C C N T C N C C N T C N C C N C C T T T C C C C C C C N C C T T C C T T C T T N C N N N C C

T T A T T A N T T N A T N T T N A N T N A T T T T A T T T T A T T T T T N T N N N A T

A A G A A G N G A N G A N G A N G N A N G G G G A A A A N G G G G A G G G N A N N N G A

8 8 0 8 8 0 N 8 8 N 0 8 8 N 8 8 N 8 8 0 8 8 8 8 8 8 8 8 8 8 8 8 8 8 8 8 8 N 8 8 N N N 0 8

G G C G G C N C G N C C G N C C G N C C C C G G G G N C C C C G C C C C G C C C N G N N N C C

N N N 1 1 1 1 0 1 1 0 N N 1 1 N 1 N 1 N 1 1 N N 1 1 0 1 1 0 N N 1 N N 1 1 N 1 1 0 0

N N N 1 0 0 0 1 1 1 0 N N 1 1 N 1 N 1 N 1 1 N N 1 1 0 1 1 0 N N 1 N 1 1 0 0

N N N 4 N 0 0 4 4 4 4 N N 4 4 N 4 N 4 N 4 N 4 N 4 4 4 4 4 4 N N 4 N N 4 4 4 4 4 4 4 4

N N N G G G G G N N G N G N G N G C N N G G N N G G C C G N N G N N G N G G G N G G G





A N N C N C N C N C N A A A A N N N C A N  
A C C A C A C C N A A C C C A C A A G N N A N A N C N N C N C N C N  
C N N N N C C C N C N T C T T C N N C T T  
T C C T C T C C N C T C C C T C T T C N C T N C N C N C N C N C N  
C N N N N C C C N C N C C C C C C C C C C C C C C C C C N C N C N C N C N T T N  
T N N N N T T T N T N A A A A A N N T A A  
A T T A T A T T N A A T A T A A T N T A N A N T N A N T T N T T N  
1 N N N N 1 1 1 N 1 N 2 2 2 2 2 N N 1 2 2  
2 1 1 2 1 2 1 1 N 2 2 1 2 1 2 1 2 2 0 N 1 2 N 2 N 1 N 2 N 1 1 N  
T N T N C N T C N N C C C N N N N N N N C  
C C C N C C N C N C C C C C C N C C N C C N C C N C N C N C N  
A N A N G N A G N N G G A N N N N N N G  
G G G N G G N G N G N G G G G N G N G N G N G N G N G N G N G N  
G T G N G N G T N N G T G G N N G N N T T  
G T G N T T N G N G T G T G N G N T G N T T T N N G N G T N G G  
8 8 8 0 N 8 8 N 0 8 8 0 8 N 8 8 N N 8 8  
8 8 0 N 8 8 N 8 8 N 8 8 0 8 8 0 0 N 8 8 N 8 8 N N 0 N 0 8 N 8 8  
T G T T G N T G N G T G G T N T T N N G G  
G G G N G G N T N T N T G G G T G G G N G T N G G N N G N G N T T  
A G A A A N A G N A A G A A N N A N N G G  
G G A N G G N G N A N A G A A A A N G N G G N N A N A G N G A  
A A A A A N A A A A A A N N A N N G A  
G G A N A G N A N A N A G A A A A N G A N G G N N A N A G N A A  
T A T A A N T A N A A A A T N A A N N A A  
A A A N A N A N A N A A A A A A N A N A A A N A N A N A T

N N A N C C C C C C N N N N C C A N C C C C C C A N C C A A C N N N C C C N C A C C C C N N A C

N N C N C C C C C C N N N N C C T N C C C C C C T T C N N N C C C N C C T C C C C N N C C

N N C N T T C C C T N N C N N N T N C C C C C C T T C C C C C C C C T N C C C C C C N N C C

N N T N T T T T N N T N N N T T A N T T T T T T T T T A A T N N N T N T T N T A T T T N N T T

N N 1 N 1 1 1 N N 1 N N N 1 N N 1 1 1 1 1 1 1 1 1 1 2 2 1 N N N 1 N 1 1 N 1 2 1 1 N N 1

N N N N N C C C N N C C C C N C C C N C C C N C C C N C C N C C C T C C

N N N N N G G G N N N G N G N G N G N G N G N G N G N G N G N G N G N G N G N G N G G A G G

N N N G N G T G N N N T N T T N G N G T N G N G G N G G G N N N T G G T N G G G - G N G G G G G

N N N 0 N 8 8 0 N N N 8 N 8 8 N 0 N 8 N 8 0 0 0 N 8 0 8 0 0 0 N 8 8 N N 8 8 8 8 8 8 8 8 8 8

N N N G N T G G N N N G N G N G N T N G G G N T G G G G N G N G T T G G T T T G - G N G T T T T T

N N N A N G G A N N N G N G N A N A G N A N A A A N G A A A N G N N G A A A G A A A A A A A G A

N N N A N A G A N N N G N G N A N A G N A N A A A A A A A A A A A A A A A A A A A A A A A

N N N A N A A A N N N A N A A N A A A A A A A A A A A A A A A A A A A A A A A A A A A A A A

N N N C C C C C N C C A N N C C C N C C N C C A N N C C C N N N A C A A A N N C N N A N N C N C N A C C C C N C C A  
 N N N C C C C C C C T N N C C C N C C N C C N C C N C C C T T C C T N N C N T T N N C N C N T C C C N C C T T  
 N N N C T T T C C C N N C C N C C N C C C C C C C C C C C C C C C C C C C C C C C C C C C C C C C C C C C C C C C  
 N N N T T T T T T T N N T T T N T T N T T T N T T T A A T A T T A N N T N A A N N T N A T T T T N T T A  
 N N N 1 1 1 0 1 1 1 N N 1 1 N 1 N 1 N 1 N 1 N 1 N 1 2 2 1 2 1 1 2 N N 1 N 2 2 N N 1 N 1 N 2 1 1 N 1 1 2  
 C N N C C T C C N N T N C C N C N N N N N C C N C C C T N N N C C C T N N N C C C N C C C N C N C N  
 G N N G G A G N N A N G N G N N N N N G N N N G N N N G N N N A G G A N N N G N G N G G N G N G N  
 G T G G G G T N N G N G N N N N G N N T G T T N N N T T N N G T T G N T N G T N G G N G N G N  
 8 8 8 8 8 0 8 N N 8 8 0 8 8 N N N N N 8 N 0 N N 8 0 8 8 N N N 8 8 8 8 8 0 8 N 8 8 0 8 8 0 0 0  
 T G T T T T G N N T N G G T N N N N N T N G N N G G G N N N G G N T G G T N G N G N T G G N G G N  
 G G A A G A G N N A N G A A G N N N N N G N A N N G A G N N G G N A G G A A N G N A G N A G A A N  
 A G A A A A A N N A N A A A A N N N N A N A N N G A G N N G G N A G G A A N G N A G N A A A A N  
 A A T A A T A A N N T N A A A A N N N N A N A N N A A A A N N A A A N T A A T N A N A A N A A A A N



A A A A T A A A T N A A T A A N N A A A N T N A A N N A A A A T A A A N T A A N N N A N T T A N

A A A A A A - A A A N A G A A G N N N A A A N A N N A A A G A A A A N A A N N N A N A A A N

A A A A A A - A A G A N G A A G N N N A A A N A N A A G G A A A A N A A N G N N N A N A A A N

G G G G T G - G G T T N T G T G N N N G G G N T T N N T G G G T T T T N T G N T N N N T N T T T N

0 0 0 0 8 0 N 0 0 8 8 N 8 8 0 8 N N N 0 0 0 N 8 N 8 N 8 0 8 8 8 8 8 8 0 N 8 N N N 8 8 8 8 N

G G G G G G - G N G N G T G T N N N G G G N G N G G T T G G G N G N G N N N G N G N G G N

G G G G N G N G A N G A N G N N N G N N A N N G G G N A G G N A G N G N N N N G N A A G N

C C C C N C N C T N C C T N C N N C N C N N T N N C N C N T C C C N T C N C N N N C N T T C N

1 1 1 1 1 1 1 1 1 1 N N N 1 1 N 1 1 1 1 N 2 1 N 1 2 N 1 N 1 1 N N N 1 1 N 1 N 2 N N N 2 N N

T T T T T T T T N N N T T N T T T T N N T T T N A T N T T T N N N T T T N T N A N N N A N N

C T N C C C T T C C N N N C N C C T N N C C C N T C C N C C N T T N N N T C C N T N C N N N C N N

C C C C C C C C C C C C N N N C N C C C C N C C C N T C N C C N C C C N C N T N N N T N N

C C C A C C C C N C A N N N C C N N C C C N C C C N C C C N A C N C A N C N C C N N N C C A N C N A N N N A N N



|   |   |   |   |   |   |   |   |   |   |   |   |
|---|---|---|---|---|---|---|---|---|---|---|---|
| 0 | 6 | A | C | 2 | G | 3 | T | T | 0 | 7 | 0 |
| 7 | 0 | G | T | 4 | C | 0 | T | T | 7 | 7 | 0 |
| 0 | 6 | A | C | 4 | C | 0 | T | T | 7 | 7 | 0 |
| 0 | 6 | G | T | 4 | C | 6 | T | T | 0 | 0 | N |
| N | N | G | T | N | C | N | T | T | 3 | 0 | 0 |
| 0 | 6 | G | T | 4 | C | 0 | T | T | 0 | 0 | 0 |
| 7 | 0 | A | T | N | C | 6 | T | T | 0 | 6 | 0 |
| N | N | G | T | 5 | C | 0 | T | T | 3 | 0 | N |
| 0 | 6 | G | T | 4 | C | 0 | T | T | 0 | 6 | 0 |
| 7 | 0 | G | T | 5 | C | 6 | T | T | 3 | 0 | 7 |
| 0 | 6 | A | T | 2 | G | 3 | T | T | 0 | N | 0 |
| N | N | N | T | 5 | C | N | T | T | N | 0 | N |
| 0 | 6 | G | T | N | C | 0 | T | T | 0 | 6 | 0 |
| N | N | N | T | N | C | 0 | T | T | 3 | 0 | 7 |
| N | 0 | G | T | 4 | C | 0 | T | T | 0 | 6 | 0 |
| 7 | 0 | G | T | 4 | C | 6 | T | T | 3 | 0 | 7 |
| 7 | 0 | G | T | 4 | C | 0 | T | T | 3 | 0 | 7 |
| 0 | 6 | N | T | 5 | C | N | T | T | 3 | 0 | 0 |
| 7 | 0 | G | T | N | C | 0 | T | T | N | 0 | N |
| 7 | 0 | G | T | 4 | C | 0 | T | T | 3 | 0 | 0 |
| 0 | 6 | N | T | 5 | C | 6 | T | T | 3 | 0 | 0 |
| 0 | 6 | G | T | 5 | C | 6 | T | T | 3 | 0 | 0 |
| 0 | 6 | G | T | 5 | C | 6 | T | T | 3 | 0 | 0 |
| N | N | N | T | N | C | 0 | T | T | 3 | 0 | N |
| 7 | 0 | G | T | 4 | C | 3 | T | T | 3 | 0 | 7 |
| 0 | 6 | N | T | N | C | 0 | T | T | N | 0 | N |
| N | 0 | G | T | 4 | C | 0 | T | T | 3 | 0 | 7 |
| 7 | 0 | G | T | 4 | C | 0 | T | T | 3 | 0 | 7 |
| 7 | 0 | G | T | 4 | C | 6 | T | T | 3 | 0 | 7 |
| 0 | 6 | N | T | 5 | C | N | T | T | 3 | 0 | 0 |
| N | N | N | T | N | C | 6 | T | T | N | 0 | N |
| 0 | 6 | G | T | 5 | C | 6 | T | T | 3 | 0 | 7 |
| 7 | 0 | G | T | 4 | C | 0 | T | T | 3 | 0 | 7 |
| 0 | 6 | N | T | N | C | 6 | T | T | 3 | 0 | 7 |
| 0 | 6 | G | T | 5 | C | 6 | T | T | 3 | 0 | 7 |
| 0 | 6 | A | T | 2 | G | 3 | T | T | 0 | 7 | 7 |



07000007NNN0N7000NNNNNN0N0NN7077NN777N7N07700N7N07N07N00N00N

6066660NN6N0666NNNNNN6N6NN000N0N6N0N6N0N6N6N6N6N6N

GGAGGAGGNNAAGGGNNNNNGNGNGGGGGAGGANGGNNGGGGGN

TTCTTCTTNNNCNTTTTNNNNNTNTNTTTTNTTTTCTTCTNTNTTNTTTNTTT

54255254NNN2N0555NNNNNN5N5NN454444N4524452N4N54N505N555N

GC CGCGCCNNGCCCGNNNNNGNCNCCCGCCCGCCGNCCNCCNCCNCC

60306360NN3N0666NNNNNN6N6NN000N00630063N0N60066663

TTTCTTTTNTNTTTTNNNNNTNTNTTTTNTTTTNTNTTTNTTTNTTTNTTT

TTTTTTGTTNTNTTGTTNNNNNTNGNTTGTNTNTGTTTGTNTTTGNGGT

33003033NNN0N03333NNNN3N3N3333333333333333333333330

227027222NN7N72222NNNN2N2NN2222222222222222222222227

11011011NN0N1111NNNN1N1NN11111111111101110N11N11112227



| AL5_21 | AL5_22 | AL5_23 | AL5_24 | AL8_1 | AL8_2 | AL8_3 | AL8_4 | AL8_5 | AL8_6 | AL8_7 | AL8_8 | AL8_9 |
|--------|--------|--------|--------|-------|-------|-------|-------|-------|-------|-------|-------|-------|
| T      | A      | A      | G      | 3     | 18    | A     | 2     | G     | T     | G     | 3     | A     |
| T      | A      | A      | G      | 3     | 18    | A     | 0     | G     | T     | G     | 3     | A     |
| T      | G      | G      | C      | 3     | 18    | A     | 0     | G     | T     | G     | 3     | A     |
| T      | A      | A      | N      | N     | N     | N     | N     | N     | N     | N     | N     | N     |
| N      | N      | N      | N      | 3     | 18    | A     | 0     | N     | T     | G     | 3     | A     |
| N      | N      | N      | N      | 3     | 18    | A     | 0     | N     | T     | G     | 3     | A     |
| T      | A      | A      | G      | N     | N     | A     | N     | N     | T     | N     | N     | A     |
| T      | A      | A      | G      | 3     | 0     | A     | 0     | G     | T     | G     | 3     | A     |
| T      | G      | G      | C      | 3     | 18    | A     | 0     | G     | T     | G     | 3     | A     |
| T      | G      | G      | C      | 0     | N     | G     | 2     | A     | C     | A     | 0     | G     |
| C      | G      | G      | C      | 0     | N     | G     | 2     | A     | C     | A     | 0     | G     |
| T      | G      | G      | C      | 3     | 18    | A     | 0     | N     | N     | G     | 3     | A     |
| T      | G      | G      | N      | 0     | N     | N     | 2     | A     | N     | A     | 0     | G     |
| T      | N      | A      | C      | 3     | 18    | A     | 0     | N     | C     | A     | 3     | A     |
| T      | A      | A      | G      | N     | 0     | A     | 0     | N     | T     | G     | 3     | A     |
| T      | A      | A      | G      | N     | N     | A     | N     | G     | T     | N     | N     | A     |
| C      | G      | G      | C      | 3     | 18    | A     | 0     | N     | T     | G     | 3     | A     |
| T      | N      | N      | N      | N     | N     | N     | N     | N     | N     | N     | N     | N     |
| T      | N      | N      | N      | N     | N     | N     | N     | N     | N     | N     | N     | N     |
| T      | G      | G      | C      | 3     | 18    | A     | 0     | N     | T     | G     | 3     | A     |
| T      | G      | G      | C      | 3     | 0     | N     | N     | G     | T     | N     | 3     | A     |
| T      | G      | G      | C      | 3     | 18    | A     | 0     | N     | T     | G     | 3     | A     |
| T      | G      | G      | C      | 0     | N     | G     | 2     | A     | C     | A     | 0     | G     |
| T      | A      | A      | G      | 3     | 18    | A     | 0     | N     | T     | G     | 3     | A     |
| T      | A      | A      | G      | 3     | 18    | A     | 0     | N     | T     | G     | 3     | A     |
| T      | N      | N      | C      | 3     | 18    | A     | 0     | N     | T     | G     | 3     | A     |
| C      | G      | G      | C      | 3     | 18    | A     | 0     | N     | T     | G     | 3     | A     |
| T      | G      | G      | C      | 3     | 18    | A     | 0     | N     | T     | G     | 3     | A     |
| T      | G      | G      | C      | 3     | 18    | A     | 0     | N     | T     | G     | 3     | A     |
| T      | G      | G      | C      | 3     | 18    | A     | 0     | N     | T     | G     | 3     | A     |
| T      | G      | G      | C      | 3     | 18    | A     | 0     | N     | T     | G     | 3     | A     |
| T      | G      | G      | C      | 3     | 0     | A     | 0     | G     | T     | G     | 3     | A     |
| T      | G      | G      | C      | 3     | 18    | A     | 0     | N     | T     | G     | 3     | A     |
| T      | G      | G      | C      | 3     | 18    | A     | 0     | N     | T     | G     | 3     | A     |
| T      | A      | A      | G      | N     | N     | A     | N     | G     | T     | N     | N     | A     |
| T      | A      | A      | G      | N     | 3     | 18    | N     | N     | T     | G     | 3     | A     |
| N      | N      | N      | N      | 3     | 18    | A     | 0     | N     | T     | G     | 3     | A     |
| T      | N      | N      | N      | 3     | 18    | A     | 0     | N     | T     | G     | 3     | A     |
| T      | N      | N      | N      | 3     | 18    | A     | 0     | N     | T     | G     | 3     | A     |
| T      | N      | N      | N      | 3     | 18    | A     | 0     | N     | T     | G     | 3     | A     |
| T      | N      | N      | N      | 3     | 0     | N     | N     | G     | T     | N     | 3     | A     |
| T      | A      | A      | G      | 0     | N     | A     | 2     | G     | C     | A     | 0     | G     |
| T      | A      | A      | G      | 3     | 18    | A     | 0     | G     | T     | G     | 3     | A     |
| T      | A      | A      | G      | 3     | 0     | A     | 0     | G     | T     | G     | 3     | A     |
| N      | N      | N      | N      | 3     | 0     | A     | 0     | G     | T     | G     | 3     | A     |

|                                                                                                                                                                                       |                                                                                                                                                                             |                                                                                                                                                                                  |                                                                                                                                                                                                                |                                                                                                                                                                                            |                                                                                                                                                                                                                     |                                                                                                                                                                                       |                                                                                                                                                                                       |                                                                                                                                                                                       |                                                                                                                                                                             |                                                                                                                                     |                                                                                                                                                                                       |                                                                                                                                                                                       |
|---------------------------------------------------------------------------------------------------------------------------------------------------------------------------------------|-----------------------------------------------------------------------------------------------------------------------------------------------------------------------------|----------------------------------------------------------------------------------------------------------------------------------------------------------------------------------|----------------------------------------------------------------------------------------------------------------------------------------------------------------------------------------------------------------|--------------------------------------------------------------------------------------------------------------------------------------------------------------------------------------------|---------------------------------------------------------------------------------------------------------------------------------------------------------------------------------------------------------------------|---------------------------------------------------------------------------------------------------------------------------------------------------------------------------------------|---------------------------------------------------------------------------------------------------------------------------------------------------------------------------------------|---------------------------------------------------------------------------------------------------------------------------------------------------------------------------------------|-----------------------------------------------------------------------------------------------------------------------------------------------------------------------------|-------------------------------------------------------------------------------------------------------------------------------------|---------------------------------------------------------------------------------------------------------------------------------------------------------------------------------------|---------------------------------------------------------------------------------------------------------------------------------------------------------------------------------------|
| T<br>T<br>T<br>C<br>T<br>T<br>T<br>T<br>T<br>N<br>T<br>C<br>T<br>T<br>T<br>T<br>N<br>C<br>C<br>N<br>N<br>T<br>T                                                                       | A<br>G<br>A<br>G<br>G<br>G<br>A<br>G<br>N<br>G<br>G<br>G<br>A<br>N<br>G<br>G<br>N<br>N<br>G<br>G                                                                            | A<br>G<br>A<br>G<br>G<br>G<br>A<br>G<br>N<br>G<br>G<br>G<br>A<br>N<br>G<br>G<br>N<br>N<br>G<br>G                                                                                 | G<br>C<br>G<br>C<br>C<br>C<br>G<br>C<br>C<br>N<br>C<br>C<br>C<br>C<br>G<br>N<br>C<br>C<br>N<br>N<br>C<br>C                                                                                                     | N<br>N<br>3<br>N<br>3<br>3<br>3<br>0<br>N<br>N<br>3<br>3<br>3<br>3<br>3<br>3<br>3<br>N                                                                                                     | N<br>N<br>0<br>N<br>0<br>0<br>18<br>N<br>N<br>N<br>N<br>18<br>N<br>18<br>N<br>N<br>18<br>0<br>18<br>0<br>0<br>N                                                                                                     | N<br>N<br>A<br>N<br>A<br>A<br>A<br>G<br>N<br>N<br>A<br>A<br>G<br>N<br>A<br>A<br>A<br>A<br>A<br>N                                                                                      | N<br>N<br>0<br>N<br>0<br>0<br>0<br>2<br>N<br>N<br>2<br>N<br>N<br>0<br>0<br>2<br>N<br>0<br>0<br>0<br>0<br>0<br>N                                                                       | N<br>N<br>G<br>N<br>G<br>G<br>G<br>A<br>A<br>N<br>N<br>G<br>A<br>N<br>G<br>G<br>N<br>G<br>G<br>N                                                                                      | N<br>N<br>T<br>N<br>T<br>T<br>T<br>C<br>C<br>N<br>N<br>T<br>T<br>C<br>N<br>T<br>T<br>T<br>T<br>T<br>N                                                                       | N<br>N<br>3<br>N<br>3<br>3<br>3<br>0<br>N<br>N<br>3<br>3<br>3<br>0<br>N<br>N<br>3<br>3<br>3<br>3<br>N                               | N<br>N<br>A<br>N<br>A<br>A<br>A<br>G<br>N<br>N<br>A<br>A<br>G<br>N<br>A<br>A<br>A<br>A<br>A<br>A<br>N                                                                                 |                                                                                                                                                                                       |
| T<br>T<br>T<br>N<br>T<br>T<br>T<br>N<br>C<br>N<br>C<br>T<br>T<br>T<br>T<br>C<br>T<br>T<br>T<br>C<br>T<br>T<br>T<br>N<br>T<br>T<br>T<br>T<br>T<br>N<br>T<br>T<br>N<br>T<br>T<br>T<br>T | G<br>G<br>G<br>N<br>G<br>G<br>N<br>G<br>N<br>G<br>N<br>G<br>N<br>G<br>N<br>G<br>G<br>G<br>G<br>G<br>G<br>G<br>G<br>G<br>N<br>G<br>G<br>G<br>N<br>G<br>G<br>N<br>G<br>G<br>A | G<br>G<br>G<br>N<br>G<br>G<br>N<br>G<br>N<br>G<br>N<br>G<br>N<br>G<br>G<br>G<br>G<br>G<br>G<br>G<br>G<br>G<br>G<br>G<br>G<br>G<br>N<br>G<br>G<br>N<br>G<br>G<br>N<br>G<br>G<br>A | C<br>C<br>C<br>N<br>C<br>C<br>N<br>C<br>C<br>N<br>C<br>C<br>N<br>N<br>C<br>C<br>N<br>N<br>C<br>C<br>C<br>C<br>N<br>N<br>C<br>C<br>N<br>C<br>C<br>N<br>C<br>C<br>N<br>N<br>N<br>N<br>N<br>C<br>C<br>C<br>C<br>N | 3<br>3<br>3<br>3<br>N<br>3<br>N<br>N<br>3<br>N<br>N<br>N<br>N<br>3<br>N<br>N<br>N<br>3<br>N<br>N<br>N<br>3<br>3<br>3<br>3<br>3<br>3<br>3<br>3<br>3<br>N<br>N<br>N<br>0<br>3<br>3<br>N<br>N | 0<br>18<br>0<br>18<br>0<br>18<br>N<br>N<br>18<br>N<br>N<br>N<br>N<br>18<br>N<br>N<br>N<br>18<br>N<br>N<br>N<br>0<br>18<br>18<br>18<br>18<br>0<br>18<br>18<br>18<br>0<br>18<br>N<br>N<br>N<br>N<br>18<br>N<br>N<br>N | A<br>A<br>A<br>A<br>A<br>A<br>N<br>N<br>A<br>N<br>N<br>N<br>A<br>A<br>N<br>N<br>N<br>A<br>A<br>A<br>A<br>A<br>A<br>A<br>A<br>A<br>A<br>A<br>A<br>A<br>N<br>N<br>G<br>A<br>A<br>N<br>N | 0<br>0<br>0<br>0<br>0<br>N<br>N<br>0<br>N<br>N<br>0<br>N<br>N<br>N<br>0<br>N<br>N<br>N<br>0<br>0<br>0<br>0<br>0<br>0<br>0<br>0<br>0<br>0<br>0<br>0<br>N<br>N<br>2<br>0<br>0<br>N<br>N | G<br>G<br>G<br>G<br>G<br>G<br>G<br>N<br>N<br>G<br>N<br>N<br>G<br>N<br>N<br>G<br>N<br>N<br>G<br>G<br>G<br>G<br>G<br>G<br>G<br>G<br>G<br>G<br>G<br>G<br>N<br>N<br>A<br>G<br>G<br>N<br>N | T<br>T<br>T<br>T<br>T<br>N<br>N<br>T<br>N<br>N<br>N<br>T<br>T<br>N<br>N<br>N<br>T<br>T<br>T<br>T<br>T<br>T<br>T<br>T<br>T<br>T<br>T<br>T<br>N<br>N<br>C<br>T<br>T<br>N<br>N | G<br>G<br>G<br>G<br>G<br>G<br>N<br>G<br>N<br>N<br>G<br>N<br>N<br>N<br>G<br>N<br>N<br>N<br>G<br>G<br>N<br>N<br>A<br>G<br>G<br>N<br>N | 3<br>3<br>3<br>3<br>3<br>N<br>3<br>3<br>N<br>N<br>N<br>N<br>3<br>N<br>N<br>N<br>3<br>N<br>N<br>N<br>3<br>3<br>3<br>3<br>3<br>3<br>3<br>3<br>3<br>3<br>N<br>N<br>0<br>3<br>3<br>N<br>N | A<br>A<br>A<br>A<br>A<br>N<br>A<br>A<br>N<br>N<br>A<br>A<br>N<br>N<br>A<br>A<br>N<br>N<br>A<br>A<br>A<br>A<br>A<br>A<br>A<br>A<br>A<br>A<br>A<br>A<br>N<br>A<br>G<br>A<br>A<br>N<br>N |



N N N T T T T T T N N T T T T T C N T T T T T N T T T T T N T T T T T T T T T T T N T T T T T C T T C T T T T C T T T T N T T C C T T C  
N N N G G G G G N N G N G N G N G G G G N G G G G G N G G G G G N G G G A G G A A G G G N G G G A G  
N N N G G G G N N G N G N G N G G G N G G G N G G G A G G A A G G G N G G G A G  
N N N C C C C N N C N C C C C C N N N N C C C C N C C C C C C N C C N C N C N C C  
N N 3 N N N 3 3 N 3 3 0 0 N 3 3 3 N N N 0 0 N 3 N N 3 N N 0 N 3 3 3 3 3 3 3 3 3 N 3 3 0 0 3 N  
N N 0 N N N 18 0 N 18 18 N N N 18 0 0 0 N N N N N N N N N 18 18 N N N 0 0 N N 18 0 18 18 18 18 18 18 0 N N 18 18 18 N N  
N N A N N N A N A A G N A A A N N N G N A N N A N N A A A A A A A A N N N N N A A A G A N N  
N N 0 N N N 0 0 0 2 N 0 0 0 N N N 2 N 0 N N 0 N N 2 N 0 0 0 0 0 0 0 0 0 0 0 N N N 0 0 0 2 0 N  
N N G N N N G N G A A N G G N N A A N G N N A N G N G G G N G N G G G G N N N G N N N T T T T T T T N N N T T T C T N  
N N T N N N T T T C C N T T T N N N C C N T N N C N T T T T T N N T T T T T N N N G N N G G G N N G G G A G N N  
N N 3 N N N 3 3 N 3 3 0 0 N 3 3 3 N N 0 0 N 3 N N 3 0 N 3 3 N 3 3 3 3 3 3 N N 3 3 3 3 0 3 N N  
N N A N N N A N A A G N A A A N N G N A N N A N A G N A A A A A A A A N N A A A A A G A N N







NNNGGCCCCNNCCCCGGGN  
GCCGCCNGCCNNCCNNCCCGCCCGGNCNN

NNCCCGNNCCCGCCCN  
CCCCCCNNCCNNCCCGCCCGCCNCCNN

NNANAAAGNNAGNAAAN  
AAAAANANANANANANANANAGANN

NNNGGCCNNGCNGGGN  
GGGGNNGNNGGGGGGNGCGGN

NNTTTCCNNTTCNTTTN  
TTTTTNNTTNNTTTTNTCTNN

NNTTTAANNTTTTN  
TTTTTNNTTNNTTTNTANN

NNAAAGGNNGGAGAN  
AGAGNAGANNAGGGAGAGGN

NNAAAGNNAAGNAAAN  
AAAAANANANANAAAAANAGANN

NNGCGAGGNAGAGN  
GAGAGANGANNNGAAAAAGNGGAN

NNANAAAGNNAAGNAAAN  
AAAAANANANANAAAAANAGANN

NNTTTCCNNTTCNTTTN  
TTTTTNNTTNNTTTTNTCTNN

N N G N N N C G N C C C C C G G G N N C C N C N N C N G C N G G N G C C C C C C C N G N N C C C C C C N

N N C N N N C C C C C C C C C C C C C C C C C C C C C C C C C C C C C C C C C C C C C C C C C C C C C C C C C

N N A N N N A A N A A G G N A A A A N N G N A N N A G N A A N A A A A A A A N A N N A A A A G A N N

N N G N N N G G N G C C N G G G N N C C N G N G C N G G G G G G N G N N G G G C G N N

N N T N N N T T N T T C C N T T T T N N C C N T N T C N T T T T T T N T N T T T T T T N T N T T T C T N N

N N T N N N T T N T T A A N T T T T N A A N T N T A N T T T T T T N T N T T T T A T N N

N N A N N N G A N G G G N G A A A G N N G N G N A A N A G A G G G G N A N N G G G G N N

N N A N N N A A N A A G G N A A A A N N G N A N N A G N A A A A A A A A A A A A G A N N

N N G N N N A G N A A G G N A G G A N N G N A N N A G N G N G A G A A A A A N G N N A A A A G A N N

N N A N N N A A N A A G G N A A A A N N G N A N N A G N A A N A A A A A A A A A A A A G A N N

N N T N N N T T N T T C C N T T T T N N C C N T N T C N T T T T T T T T T T N T N T T T T C T N N

C C G C N C N N C C C C C G N C G N N N C N C G N C G N C C G C G N N N C C C G C N C N C G C G C C C C C C C N G

C C C C N C N N C C C C C C N C N N C N C C C C C C C C C C C C C C C C C C C N C

A A A N A N N A A A A A N A N N N A N A A A A A A N N N A A A A N A N A A A A A A A N A N

G G G N G N N G G G G G N G N N N G N G G G G N N N G G G G G G G N G N

T T T N T T N T T T T T N T T N N N T T T T T T T T T T T T T T T T T T T T T T N

T T T N T T N T T T T T N T T N N N T T T T T T T T T T T T T T T T T T T T T N

G G A G N G N G G G A A N G A N N N G A N G A G A N N N G G A G N G A G A G G G N A N

A A A N A N A A A A A A N A N N N A N A A A A A A A A A A A A A A A A A A N A N

A A G A N A N A A A A G N A G N N A N A G N A G A G N N A A A G A N A G A G A A A A N G N

A A A N A N A A A A A A N A N N N A N A A A A A A N N N A A A A N A N A A A A A A N A N

T T T N T T N T T T T T N T T N N N T T T T T T T T T T T T T T T T T T T T T N T N

CTTTTNTTCTNNNTNTTCTCTNTTTTTCNTTTTTNTTCTTNCTN

GAANAAGAANNANAAGAGAAAGAAGANNAAGANN

GAANAAGAANNANAAGAGAGGAAGAGAAAGAANN

GAANAAGAANNANAAGAGAAAGAAAGAAAGANN

GGGNGGGNNNGANAGAAGGAAGGNGGGNGGN

ATTTNTTTATNNNTTATTCTNTTTTTTANTTTTATNNA

CTTTNTTCTNNNTNTTNTTCTNTTTTTTCTNNTTN

CGGNGGGNNNGGCGGCGGNGGGGGGGGCGGNCGN

GAANAAGAANNANAAGAGAAAGAAAGAAAGAAAGAAAGANN

GCCCNCCGNCNNCCNCNCNCCGCGCCCCGNCNCCGNCCCNCCGN

CCCCNNCCCCNNNNNNCCGNGGCGGCGGCGGCGGCGGCGGCGGCGG























GGGAGGNGGGGGGGGAGGGNGGGNNNAAGAAAGNGNGAGAGGGGNAAGGGG  
CCACCNCCCACCCACCCACCCACCCACCCACCCACCCACCCACCCACCCACCCACCC  
GNGTGGNGGGGGCCCGGTGGNGGGNNNTGTTTGNGGNGTTGGGNTGCCGGG  
GNGGGNGGGGAAGGGGGNGGGGGGGGGGGGGGGGGGGGGGGGGGGGGGGGGGGGG  
GNGGGNGGGGCCCGGGGGGGGGGGGGGGGGGGGGGGGGGGGGGGGGGGGGGGGGGG  
CNCTCCNCCCCTCCCTCCCTCCCTCCCTCCCTCCCTCCCTCCCTCCCTCCCTCCCTCC  
GNCGCNCCCCTCCCTCCCTCCCTCCCTCCCTCCCTCCCTCCCTCCCTCCCTCCCTCC  
GGGGGGGAGNAGGGGAAAGNAAAGAGGGANANANANANANANANANANANANAN  
CCCCCTCCCTCCCTCCCTCCCTCCCTCCCTCCCTCCCTCCCTCCCTCCCTCCCTCC  
8000088000044001212121212121212121212121212121212121212  
4444444444444444444444444444444444444444444444444444444  
0000000000000000000000000000000000000000000000000000000  
12121212121212121212121212121212121212121212121212121212  
CCCCCTCCCTCCCTCCCTCCCTCCCTCCCTCCCTCCCTCCCTCCCTCCCTCCCTCC  
39393939393939393939393939393939393939393939393939393939  
GGAAGAAAGAAAGAAAGAAAGAAAGAAAGAAAGAAAGAAAGAAAGAAAGAAAGAAAG  
GGTTTGGTTTGGTTTGGTTTGGTTTGGTTTGGTTTGGTTTGGTTTGGTTTGGTTTGGTT  
GGTTTGGTTTGGTTTGGTTTGGTTTGGTTTGGTTTGGTTTGGTTTGGTTTGGTTTGGTT





N N C C C N C T C C C C C T C C C C C N C C T C C C C C C C C C C C C C C C T T T C T T C N C C N N C C N C T C C T N  
N N A G A N A G G A G A A G A A G A A G A A G A A G G G A G G A G G N A G A N N G A N A G A A G N  
N N G G N G A G G N G G N G G G N G G G A A G G A A G N G G N N G G N G G G N  
N N C C C N C A C C C C C A C C C C C C C A A A C N C C N C A C C A N  
0 5 5 0 5 0 5 0 5 N 5 N 5 5 0 0 0 0 0 5 N 5 N 5 5 5 N 5 5 0 5 0 5 5 0 N N 5 5  
4 4 0 4 4 0 4 4 4 N 4 N 4 4 0 4 4 4 4 4 4 0 4 0 4 0 4 4 4 4 0 4 4 4 0 4 0  
2 0 0 2 0 2 0 2 0 N 0 0 N 0 0 0 2 2 0 0 2 0 0 0 4 2 0 0 4 4 2 0 0 0 2 N N 2 0 0  
0 4 4 0 4 0 4 0 4 N 4 N 4 4 4 4 4 4 4 4 4 4 4 4 4 4 4 4 4 4 4 4 4 4 4 4 4  
G C C C G C C G C C G C C N C N C C C C G G G G G G C C C C C C N C C G C C G C C G N N C C  
A G G A G A G A G N G N N G G N A N G A A A A A G G G G N G N G A G A G G A N N G N G  
G C C G C C G C C N C N C C C N N G N G G G C C C C C C C C C C C N C C G C C G C C C C N C  
C G N C G C C G C C G N C N N G C G N G N C C C C C C C C C C C C C C C C C C C C C C C  
A C N A C A C A C N C N C C C N C A C A C A N A C C C C C C C C C C C N C C C C C A N N C N C  
0 0 N 0 0 0 0 0 0 0 3 N N 0 3 0 N N 0 0 0 0 3 3 3 3 3 N N 3 3 0 N 3 0 3 0 N N N N 3  
G G N G G G A G G N A N N G A G N N G N G A A A A A N N A G N A G G N A G N N N N A  
N N T T T T C C T T C T T C C T T T T T T C C C T T N T C T T C C C C T N T N C T T C T N T C C T T  
N N 1 1 1 1 2 1 2 1 2 1 2 1 2 1 2 1 2 2 1 1 1 2 1 2 1 2 1 2 2 1 2 1 2 1 2 2 2 1 1 1









A A A T T T A A A A A T T T T T A A A A A T  
T T C C C C T T T C T C C C C T C C T C  
T T T T T A A A T A T T T T T A T T A T  
G G A A A A G G A G A A A A A G A A G A  
0 0 1 1 1 1 0 0 0 1 0 1 1 1 1 0 1 1 0 1  
0 0 1 1 1 1 0 0 0 1 0 1 1 1 1 0 1 1 0 1  
C T N C C T N N N N C C N C C C C C C C C  
A C N C C C N N N N C C N C C C C A C A  
C T N C C T N N N N C C N C C C C C C C C  
G G N A A G N N N A A N A A A A A G A G  
T C N C C C N N N N C C N C C C C C T C T  
G A N A A A N N N A A N A A A A A G A G  
C T N C C T N N N N C C N C C C C C C C C  
C T N C C T N N N N C C N C C C C C C C C  
A C N C C C N N N N C C N C C C C A C A  
A C C C C A C N C C C C C C C C C C C C  
T A A A T A A A A T A T A T A T A T A T N T N N T T T A A A A  
C T T C C C C C N C T C T C C C C C C N C N C C C T C T T  
T A A T T T T N T A T A T T A T T T T N T N N T T T A T A A A  
A G G A A A A N A G A G A A A A A N A N N A A A G A G G G  
1 0 0 1 1 1 0 N 1 0 1 0 0 1 0 1 0 1 1 N 1 N N 1 1 1 0 1 0 0 0  
1 0 0 1 1 1 0 N 1 0 1 0 0 1 0 1 0 1 1 N 1 N N 1 1 1 0 1 0 0 0  
C C C C C T C C N T C C C T N C T T C C C C C C C C C N C T C N N C N C N  
A A C C C C A C N C C C C C C C C C A C C C C A C N C C A N N A N A N  
C C C C C T C C N T C C C T N C T T C C C C C C C C C N C T C N N C N C N  
G G A A A G A N G A A A G N A G G A A A A G A N A G N N G N G N  
T T C C C C T C N C C C C C C C C C C C C C T C N C C T N N T N T N  
G G A A A A G A N A A A A A A A A A G A A A G A N A A G N N G N G N  
C C C C C T C C N T C C C C T T C C C C C C C C C C C N C T C N N C N C N  
C C C C C T C C N T C C C C T T C C C C C C C C C C C N C T C N N C N C N  
A A C C C C A C N C C C C C C C C C A C C C C A C N C C A N N A N A N









T C N T T C N N N N T T T T T T T T T T T  
T T T T T C T T N C T T T C N T C C T T T T T T T N T C T N N T N T N  
C T N C C T N N N N C N C C C C C C C C C C  
C C C C C T C N T C C T N C T T C C C C C C C N C T C N N C N C N  
C A N C C A N N N N C N C C C C C C C C C C  
C C C C C A C C N A C C C A N C A A C C C C C C N C A C N N C N C N  
A T N A A T N N N N A A N A A A A A A A A  
A A A A A T A A N T A A A T T A A A A A A A N A T A N N A N A N  
C G N C C G N N N N C N C C C C C C C C C C  
C C C C C G C C N G C C C G N C G C C C C C C N C G C N N C N C N  
C T N C C T N N N N C N C C C C C C C C C C  
C C C C C T C N T C C C T N C T T C C C C C C N C T C N N C N C N  
C C N T T C N N N N T T N T T T T T C T C  
C C T T T C C T N C T T T C N T C C C T T T C T N T C C N N C N C N  
C C N T T C N N N N T T N T T T T T C T C  
C C T T T C C T N C T T T C N T C C C T T T C T N T C C N N C N C N  
A C N A A C N N N N A A N A A A A A A A A  
A A A A C A A N C A A C N A C C A A A A A A N A C A N N A N A N  
T C N T T C N N N N T T N T T T T T T T T  
T T T T C T T N C T T T C N T C C T T T T T T T N T C T N N T N T N  
A G N G G G N N N N G G N G G G G G A G A  
A A G G G A G N G G G N G G A G G G A G N G G A N N A N A N  
G T N G G T N N N N G G N G G G G G G G G  
G G G G T G G N T G G G T N G T T G G G G G N G T G N N G N G N  
T C N T T C N N N N T T N T T T T T T T T  
T T T T C T T N C T T T C N T C C T T T T T T N T C T N N T N T N

N N T N N T T T T N C C N N N T T C T T N N N N N N N N N N N T T T T T T T T T C C T N T N T N C N N T N N T T T

N N C N N C C C N T T N N N C T C C N N N N N N N N N N N C C C C C C C T T C N C N C N T N N C N N C C C

N N C N N C C C N A N N N C A C C N N N N N N N N N N N C C C C C C A C N C N C N A N N C N N C C C

N N A N N A A A N T T N N N A T A A N N N N N N N N N N N A A A A A A T T A N A N A N T N N A N N A A A

N N C N N C C C N G N N N C G C C N N N N N N N N N N N C C C C C C G C N C N G N N C N N C C C

N N C N N C C C N T T N N N C T C C N N N N N N N N N N N C C C C C C T T C N C N C N T N N C N N C C C

N N T N N C C C N C C N N N T C C T N N N N N N N N N N N T T T C C C T C C T N T N C N N T N N T C T

N N T N N C C C N C C N N N T C C T N N N N N N N N N N N T T T C C C T C C T N T N C N N T N N T C T

N N A N N A A A N C C N N N A C A A N N N N N N N N N N N A A A A A A C C A N A N C N N A N N A A A

N N T N N T T T N C C N N N T C T T N N N N N N N N N N N T T T T T T T T T C C T N T N C N N T N N T T T

N N G N N A A A N G G N N N G A G N N N N N N N N N N N G N G G A A A G A G G N G N G N N G N N G A G

N N G N N G G N T T N N N G T G G N N N N N N N N N N N G N G G G G G T T G N G N G N T N N G N N G G G

N N T N N T T T N C C N N N T C T T N N N N N N N N N N N T T T T T T T T T C C T N T N C N N T N N T T T

T T T T N T T T T T N T T T C T N T T T T T N T T T T T T T T T T T T T T T T T T T T T T N T T N

G G G G N G G G N G G G T G N G G G G N G G G G T G G T N N G G G G G G N G G N

G G G A N A G G N G N G G A N G G A A N A A A G N G A G A A G N N A A A A A G G N A A N

T T T T N T T T T T N T T T C T N T T T T T T N T T T T T T C T T C N N T T T T T T T T N T T N

A A A A N A A A N A N A A C A N A A A A A A A C A C N N A A A A A A A A A N A A N

T T T C N C T T T N T T T T C C N T T T C C N C C C T N T C C C C C C C C T T T N C C N

T T T C N C T T T N T T T T C C N T T T C C N C C C T N T C C C C C C C C T T T N C C N

C C C C N C C C C C N C C C T C N C C C C C C C C C C T C C T N N C C C C C C C C N C C N

C C C C N C C C C C N C C C G C N C C C C C C C C C C G C C G N N C C C C C C C C C C N C C N

A A A A N A A A N A N A A A T A N A A A A A A A A A A A A T A A T N N A A N A A A A A A A N

C C C C N C C C C C N C C C A C N C C C C C C C C C C C C A C C A N N C C N C C C C C C C N C C N

C C C C N C C C C C N C C C T C N C C C C C C C C C C C C C C C C T C C T N N C C N C C C C C C C N C C N

T T T T N T T T T T N T T T T T C T N T T T T T T T T N T T T T T T C T T C N N T T N T T T T T T T N T T N



N N N T T N N N N N N T T T T N C T T T N N N T N N T C T T T T T C N N N T N N T N N T T T T T N N T N N

N N N C C N N N N N N C C C N T C C N N N C N C T C C C C T T N N N C N N C C C C C N N C

N N N C C N N N N N N C C C N A C C C C C A A N N N C N N C C C C C N N C

N N N A A N N N N N A A A A N T A A A N N A T A A A A T T N N N A N N A A A A N N A N N

N N N C C N N N N N N C C C N G C C C C C G N N N C N N C G C C C C G N N N C N N C C C N N C

N N N C C N N N N N N C C C N T C C C N N N C N C T C C C C T T N N N C N N C C C C C N N C

N N N T T N N N N N N T T T C N C T T T N N N T C T C T T C C C N N N C N N T N N T C T C N N T N

N N N T T N N N N N N T T T C N C T T T N N N T C T C T T C C C N N N C N N T C T C N N T N

N N N A A N N N N N A A A A N C A A A N N A C A A A A C C N N N A N N A A A A N N A N N

N N N T T N N N N N N T T T N C T T T N N N T C T T T T T C C N N N T N N N T T T T N N T N

N N N G G N N N N N G N G A N G G G N N N G N N G G A G G G A G G N N N A N N G N N G A G A N N G N N

N N N G G N N N N N G N G G N T G G N N N G N N G T G G G G T T N N N G N N G N N G G G N N G N N

N N N T T N N N N N N T T T N C T T T N N N T N N T C T T T T T C C N N N T N N T N N T T T T N N T N



T C N T C C T T T T C T T C T T C C C

T A N T A A T T T T A T T A T T T A A

A A N A G G A A A A G A A G A A A A

T T N T C C T T T T C T T C T T T C C

N 7 0 7 7 7 7 0 7 7 7 7 7 7 7

N T T T T A T T T T T T N T T N T T N

T T T T A A T T T T A T T A N T A T T T

T T G T T T G T T T T N T T N T T G T T

T T T T T T G T T T T N T T N T T G T T

1 1 1 2 2 1 1 1 1 2 1 1 2 1 1 0 1

G G G C G G G G C C G G N G N G N G

G A N G G A N N N N G G N G G N G G N

G C N G G C N N N N G G N G G G G G G

A A N G G A N N N N G G N G G G G A G A

A G N A A G N N N N A A N A A A A A A

C T T C C T T C T T C T T C T T C C C T T T C T

A T T T A A T T A T T A T T T A T T A A A T T T A T

G A A A G G A A G A A G A A A A G A A A A A A A A

C T T T C C T T C T T C T T C T T C T T C T T C T T C T T

7 7 7 N 7 7 7 7 7 7 7 N 7 7 7 7 7 N 7 7 7 7 7 0 7 7

T T T N T T T T T T T T T T T N T T N T T N T T N T T T A T

A T T T A A T T A T T A N T A T T T A T T A N T A T T T T T

T T T T T T T T T T T N T T G T T T T T T T T G T T T

T T T T T T T T T T T T T T T T T T T T T G T T T G T

2 1 1 1 2 2 1 1 2 1 1 2 1 1 2 1 1 2 1 1 2 1 1 1 1 1 0 1

G G C G G C G G G G G N C N G G G C G G N G G G G N C N G G

G G G G A G G N A G G A N G A A G G G G G G N G A G N N G N N

G G G G C G G N C G G C N G C C G G G G G G N G C G N N G N G N

A A G G G A A G N A G G A N G A A A G G G G A G N G A A N N A N A N

A A A A A G A A N G A A A G N A G G A A A A A A A A A A N A N A N

N N T T T T T T C T T C T T C C T C T C T C C C T T C T C T C T T T T C N N C C T T

N N T T T T T T A T T A T T A T T A T T A T T A T T A T T A T T A T T A T T T T A N N A A T T

N N A A A A A A G A G A G A G A A A A A G A A A A G A G A A A A A A A N N G G A A

N N T T T T T T C T T C T T C C T T T T C T T C T T C T T C T T T T T T N C C C T T

N N 7 7 0 7 7 7 0 7 7 7 N 7 7 N 7 7 7 7 7 7 0 7 7 7 7 7 7 7 7 7 7 7 7 7 7 7

N N T T T A T T T T N T T T T A T T T T A T T A T T A T T A T T A T T T T N A T T N T T T T T

N N T T T T T T G T T N T T T T T T T T T T T T T T T T T T T T T T T T T T T T T T T T T

N N T T T T T T T T T T T T T T T T T T T T T T T T T T T T T T T T T T T T T T T T T T T

N N 1 1 1 1 1 2 1 1 N 1 1 2 N 1 1 0 1 1 2 1 1 0 2 2 1 0 1 2 1 2 N 0 1 N N 1 0 N 1 2 2 2 1 1

N N G C G C C G G G N C G G N C G G G G G G G G G C C C G G C C N G C N N C N N G G G G G

N N G N N G G N A A N N G A G G N N N N N N N N N N N N G N G G G G G G C C G N G N G N C N N G N N G

N N G N N A A N A A N N N G A A G N N N N N N N N N N N N G N G G G A A G A A G N G N A N N G N N G A G

N N A N N A A A N G G N N N A G A A N N N N N N N N N N N N N N N N N A N A A A A A A G G A N A N A N G N N A N N A A A

T T T C C T T T C C C T T C T T T C T T C T T C T T C T T C T T C T T C T T C T T C

T T T A A T T T A T T A A A T T A T T T T A T T A T T A T T A T T A T T T A T T A T T A T

A A A A G G A A A G A A A G A A A A G A A A G A A A G A A A A A A A A A A A A A A A A G A

T T T C C T T C T T C T T C T T C T T C T T C T T C T T C T T C T T C T T C T T C T T C T T

7 7 0 0 7 7 7 7 7 7 N 7 N 7 7 0 7 7 7 7 7 N 7 7 7 7 0 0 N 7 7 7 7 N 7 7 7 7 7 7 7 7 7 7 7 7 7 7 0

T T T T T T T A T N T N T T A T T T A T N T T T A N T T N T T T N T T N A N A T G T T T T A

T T T A A T T T A N T N A T T A T T T A T T A T T A T T A T T A T T A T T A T T A T T A T

T T G G T T T T T N T N T T T T T T T T T T T T T T T T T T T T T T T T T T T T T T T T T

T T T T T T T T T N T N T T T T T G T T T T T T T T T T T T T T T T T T T T T T T T T T G

1 1 1 2 2 1 1 2 N 1 N 2 1 0 1 2 1 1 1 1 2 1 N 2 1 0 0 2 1 2 1 1 1 2 1 1 1 N 1 N 1 1 2 1 2 1 1 2 0

G G G G G G C G N G G G G G C G G N C C G G G G N G N C G C G C G G G G

G G G N N G G G N N G N G A G N G G G N G G G G G G A G A N N G N N G G G G G G N G G N

G G G G N G G G N G N G C G N G G G G G G G G G G G C G C N N G G G G G G G G G N G G N

G G G A N A G G N G N G G A A N G G A A N A A G N G A G A A A A N N A A A A A G G N A A N

A A A A N A A A A N A A A G A N A A A A A A A A A A A A A A A A A A A A A A A A A A A N

T T T T N T C C C T T T T T T T C T T C C C C T T T C C C C T T T N T T T C C C C T N T C C N

T T T T N T A A A T T T T T T T A T T A A A T A T T T A A A T A T T T N T T T T A A A T N T A A N

A A A A N A G G A A A A A A A A G A A A G A A G A G A A A N A A A G A G A N A A G N

T T T T N T C C T T T T T T T T T T C T T C T T C T T C T T C T T T N T T T C T C T N T T C N

0 0 7 7 7 N 7 7 N 7 0 7 7 0 7 7 7 7 7 7 7 0 N 7 0 7 7 7 7 0 0 N 0 0 7 7 7 7 N N 7 7 N

T T T T N T T N T T T T T T T T T T T T T T T T A T T T T T N T T T A T T A N N T A T N

T T T T N T A A T T T T T T T A T T A T A T T T T A T A T N N T T A N

G G T T T N T T T T G T T T T T T T T T T T T T T T G G T G G T T T T N N T T T N

T T G T T N T T T T T T G N T T T T T T T T T T T T T T T T T T T T G N N G G T N

1 1 1 1 1 N 1 2 2 1 1 1 1 1 1 2 1 1 1 2 1 1 1 1 1 1 1 2 1 2 0 N N 1 0 2 N

C G C C C N G C C C G G N C G G G C C C N C G N G G G C G G G G G C G G G C G G N N G G C N

N N N G N N N N N N G N G N A G G N N N G N N N N N G A A N N N G N N N G G G N N G N N

N N N G N N N N N N G N G N C G G N N N G N N G C G G G G C C N N N G N N G N N G G G N N G N N

N N N G N N N N N N G N G A N A G G N N N G N N G A G A G G A A N N N A N N G N N G A N N G N N

N N N A N N N N N N A N A A N G A A A N N N A N N A N N A N N A N N A N N A A A N N A N N

N N N A N N N N N N A N A A N G A A A N N N A N N A N N A N N A N N A N N A A A N N A N N







CNTTCTTTNTTCTTNCNTCTTCTTNTTTTCCNTTCTT

TNCCCTTCCNCCTTCTTNTNCTTCCCNCCCTTNCCTT

4N444444444444444444444444444444444

0N2200222N2202220N22022222222222222

GNGGGGGGGNCGGGGGGGGGGGGGGGGGGGGGGGGGG

CNGGGGGCCGNCGCCGCGCCGCGCGCGCGCGCGCGCGG

TNTTTTTTCNTTTCNTTTCTTNTTTCTTNTTTCTTTCT

0N8000000N8000000N800000000000000000080

CCCCCNCCTNNTNCTNNTNCTNNTNCTNNTNCTNNTNC

GGGCNNGNGNGNGNGNGNGNGNGNGNGNGNGNGNGNG

GGCGCGCGCGCGCGCGCGCGCGCGCGCGCGCGCGCGCG

CACCCCCNCCNCCNCCNCCNCCNCCNCCNCCNCCNCCNCC

AGGGGGGNANNGNANNGNANNGNANNGNANNGNANNGNA

TTTTCTTTNTNTNTNTNTNTNTNTNTNTNTNTNTNTNT

NN10011N001100110011001100110011000010

NNAAA AA AAA AAA AAA AAA AAA CAAA A A A A A

NNGGTGGTGGTGGTGGTGGTGGTGGTGGTGGTGGTGGTGG



T T G G N G T T T T G G T G G G G T G T T T T T T G T N T T G T T T T G N T T G T T T T G N G T T N  
A A A A N A A A C A A A A A A A C C A A A A A A C A A A A A A A A A A A A A A A A A A A A A C A N A C A N  
0 0 0 1 0 N 1 0 0 0 0 0 1 1 0 0 1 0 0 0 1 0 0 0 0 0 0 0 0 0 1 0 0 1 0 0 0 0 0 N 0 0 1 0 0 0 0  
T T T T C T C T T N C T C T T T T N T T N T T N T T N T T N T T N T T N C T T T C C C T T T C T C N  
G A A G A A G A A N G G G G A G N G N G N A A N N G G N A A N G G A A G G G A G G G N  
C C C C C C C C C N C C A A C C N C C N C C C N C C C C C C C C C C C C C C C C C C C C C C C C C C C C C C  
C G G C C C G G G N C C C G G N C C G G N C C C C C C C C C C C C C C C C C C C C C C C C C C C C C C C C C C  
C G G G C G N G N G C C C N G N C C G N G N G N G N G G G G G G C C C C C C C C C C C C C C C C C C C C C C  
C T T C C C N T C N C T C C C C N T C N T N C C T N N N N T N N C C C N T N C C T T C C C C C C C C C C C C C C  
0 0 0 0 0 0 0 0 0 0 0 0 0 0 0 0 0 0 0 0 0 0 0 0 0 0 0 0 0 0 0 0 0 0 0 0 0 0 0 0 0 0 0 0 0 0 0 0  
T C T T T T C C T T T C T T T T T T T T T T T T T T T T T T T T T T T T T T T T T T T T T T T T T T T T T  
G G C G G G G G G G G G G G G G G G G G G G G G G G G G G G G G G G G G G G G G G G G G G G G G G G G G G  
G G G G G G G G G G G G G G G G G G G G G G G G G G G G G G G G G G G G G G G G G G G G G G G G G G G G G  
2 2 0 2 2 0 2 2 0 0 0 2 0 2 2 2 2 2 2 2 2 2 2 2 2 2 2 2 2 2 2 2 2 2 2 2 2 2 2 2 2 2 2 2 2 2 2 2  
4 6 4 4 4 4 4 6 4 4 4 4 4 4 4 4 4 4 4 4 4 4 4 4 4 4 4 4 4 4 4 4 4 4 4 4 4 4 4 4 4 4 4 4 4 4 4 4 6  
C T T C T T C T T T T T T T T T T T T C T C C T T N T C T T C T T C T T C T T C T T C T T C T T C T T C T T C T T  
T T C T C C T T T T C T T C T T T T C T T C T T C T T N C C T T T C T C N C T C T T C C T T C C T T T C C C T















N N T T T T T T T T N T T N T T N T T T T C T T  
N N T N C C C T T T T N N N T T T T T N N N T T T T N T T T T T N T T T T T T  
A A A A A G A A A A A A A A A A A A A A A A A A A A A A A A A A A A A A  
A G A G A A A G A A G A A A A A A A A A G G G A A G A A G G  
C C N C C T C C C C C T C C T C C C C C C  
C C G C N G C C N C C G C G G G N C N G  
C C T C N T C C N C C T C T T T T N C N T  
N C T T N C N C C T C N N T T N T C C C T T C C N C C C T C C  
T C C C N C C C N C T C C C C C C N T N C  
N C C C N C C C T N N C C C N C C T T C C C T T N C C C C C T  
G T T T N T C T N N G T C T T T T N G N T  
N C T T N G N C C T G N N T T N T C G G C T T T G C N C C C T T C G  
N N A N N G N N A A N G A N A N N A  
G A N N N A G N N N N G N A N N G N N N G A N N N N A A G N

NNNAGNNANANGAGNANANANGANNAGNANNANGGNGNAA

GTNGTGNTTNGNGTNCGNNGCCNTGNCCNTGCNTGCCCTGG

TCNTCTCCNCCNTNCNCTNCTCNCCCTNCCCTNCCCTNCCCT

T CNTCTCCNCCNTNCNCTNCTNCTCNCCCTNCTNCTCCTCCTC

CTNCTCCTCNTNTNCNTNCNCCCTNCCCTNCCCTNCCCTNCCCT

CGNCGCCCNNGNCCNCCNCCNCCNCCNCCNCCNCCNCCNCCNCC

NNCCCCCCCCCTCCCCCCCCCCCTCCCTCCCTCCTTCCCNCCC

NNAAAAAAGAAAAAAGAAAAAGAAAAAGAAAAAGAAAGGA

NNAAAAAAGAAAAAAGAAAAAAGAAAAAGAAAAAGAAAAA

NNNTTTTNTTTNTTTNTTTNTTTNTTTNTTTNTTTNTTTNTTTNTTT



A G A G N G N N N N N A N N A N N N A A A A N N G A N N N N G A N N N N A N N A N N N N G A N G N

T T T N T G C T T T T N G N T N N T C G T G N N T C N G T N T N G T T C C N N N T N C T N G C T C T N T C T T

C C C N C T C C C C C N T N C N N C C T C C N N C C N C C C C C C C C C C C C C C C C C C C C C C C C C C C C C C

C C C N C T C C C C C N T N C N N C C T C C N N C C N T C T C T C N N N N C C N T C C C C C C C C C C C C C C C

T C C N T C C T C T C N C N C N N T C C T T N N T C N T T N C T C T C C C N N N N C N C T N C C C C T N C C C T

G C C N G C C G C G C N C N C N N G C C G C N N G C N G C G C C C C N N N C N C G N C C C C G N C C C G

T T T C C C C T C C T C T T C C C C C C C C C C C C C C C C C C C C C C C C C C C C C C C C C C C C C C C C C C

A A A A G G A A A G A A A A A A A A A A A A A A A G A A A A A G A A A A A A A A A A A A A A A G N N A G A N

G G G A A A A G A A G A G G A A A A A A A A A A A A A A A A A A A A A A A A A A A G G A A G G G A A A N N A A A N

T T T T T N T T T T C T T T T T T T T T N T N T T T T T N T N N T C T T N T T T C T T T T N T C T T T C N N T N N N T N
