# Supplementary material for: Association and Linkage Analysis of Aluminum Tolerance Genes in Maize
Source: PubMed Central journal article supplement (PMC2848604; doi:10.1371/journal.pone.0009958), 2010-04-01
Supplement: pone.0009958.s003.pdf [file pone.0009958.s003.pdf]

| Trait | SASSNP2 | Locus  | Site | df | F        | p      | Model df | Error df | Error MS | Rsqr_model | Rsqr_marker | SAS p value (Ns) | df  |
|-------|---------|--------|------|----|----------|--------|----------|----------|----------|------------|-------------|------------------|-----|
| lsm5  | SNP79   | ABC1   | 0    | 1  | 1.3256   | 0.2509 | 3        | 213      | 60.8476  | 0.5746     | 0.0026      |                  |     |
| lsm5  | SNP88   | ABC10  | 0    | 1  | 0.6356   | 0.4261 | 3        | 234      | 59.5144  | 0.567      | 0.0012      |                  |     |
| lsm5  | SNP89   | ABC11  | 0    | 1  | 0.6356   | 0.4261 | 3        | 234      | 59.5167  | 0.567      | 0.0012      |                  |     |
| lsm5  | SNP90   | ABC12  | 0    | 1  | 1.9338   | 0.1657 | 3        | 235      | 58.7687  | 0.5706     | 0.0035      |                  |     |
| lsm5  | SNP91   | ABC13  | 0    | 1  | 0.6246   | 0.4301 | 3        | 233      | 60.0572  | 0.5647     | 0.0012      |                  |     |
| lsm5  | SNP92   | ABC14  | 0    | 1  | 0.0638   | 0.8009 | 3        | 235      | 59.503   | 0.5653     | 1.18E-04    |                  |     |
| lsm5  | SNP93   | ABC15  | 0    | 1  | 0.2987   | 0.5853 | 3        | 229      | 60.5418  | 0.5563     | 5.79E-04    |                  |     |
| lsm5  | SNP94   | ABC16  | 0    | 1  | 1.35E-04 | 0.9907 | 3        | 225      | 62.077   | 0.5502     | 2.70E-07    |                  |     |
| lsm5  | SNP95   | ABC17  | 0    | 1  | 1.2779   | 0.2595 | 3        | 225      | 61.7923  | 0.5522     | 0.0025      |                  |     |
| lsm5  | SNP96   | ABC18  | 0    | 1  | 1.2779   | 0.2595 | 3        | 225      | 61.7952  | 0.5522     | 0.0025      |                  |     |
| lsm5  | SNP97   | ABC19  | 0    | 2  | 0.0875   | 0.9163 | 4        | 224      | 63.1014  | 0.5448     | 3.56E-04    |                  |     |
| lsm5  | SNP80   | ABC2   | 0    | 1  | 1.3256   | 0.2509 | 3        | 213      | 60.8497  | 0.5746     | 0.0026      |                  |     |
| lsm5  | SNP98   | ABC20  | 0    | 1  | 0.0342   | 0.8535 | 3        | 225      | 62.2257  | 0.5491     | 6.85E-05    |                  |     |
| lsm5  | SNP99   | ABC21  | 0    | 1  | 0.9649   | 0.327  | 3        | 222      | 61.2755  | 0.5534     | 0.0019      |                  |     |
| lsm5  | SNP81   | ABC3   | 0    | 1  | 0.1491   | 0.6997 | 3        | 219      | 63.268   | 0.5526     | 3.05E-04    |                  |     |
| lsm5  | SNP82   | ABC4   | 0    | 3  | 1.4132   | 0.2397 | 5        | 227      | 57.9116  | 0.586      | 0.0077      |                  |     |
| lsm5  | SNP83   | ABC5   | 0    | 1  | 0.6107   | 0.4353 | 3        | 234      | 59.545   | 0.5668     | 0.0011      |                  |     |
| lsm5  | SNP84   | ABC6   | 0    | 1  | 0.3047   | 0.5815 | 3        | 234      | 59.3933  | 0.5679     | 5.63E-04    |                  |     |
| lsm5  | SNP85   | ABC7   | 0    | 1  | 0.6356   | 0.4261 | 3        | 234      | 59.5061  | 0.5671     | 0.0012      |                  |     |
| lsm5  | SNP86   | ABC8   | 0    | 1  | 0.6356   | 0.4261 | 3        | 234      | 59.5091  | 0.5671     | 0.0012      |                  |     |
| lsm5  | SNP87   | ABC9   | 0    | 1  | 0.6356   | 0.4261 | 3        | 234      | 59.5119  | 0.5671     | 0.0012      |                  |     |
| lsm5  | SNP101  | AL1_1  | 0    | 1  | 6.5933   | 0.0113 | 3        | 143      | 54.766   | 0.6274     | 0.0172      | 0.0376           | 244 |
| lsm5  | SNP110  | AL1_10 | 0    | 2  | 0.1511   | 0.8599 | 4        | 132      | 90.2718  | 0.4337     | 0.0013      |                  |     |
| lsm5  | SNP111  | AL1_11 | 0    | 1  | 1.1542   | 0.2846 | 3        | 133      | 87.7751  | 0.4452     | 0.0048      | 0.0324           | 244 |
| lsm5  | SNP112  | AL1_12 | 0    | 1  | 5.973    | 0.0156 | 3        | 167      | 72.4174  | 0.5043     | 0.0177      |                  |     |
| lsm5  | SNP113  | AL1_13 | 0    | 1  | 5.3082   | 0.0225 | 3        | 167      | 73.6174  | 0.4961     | 0.016       |                  |     |
| lsm5  | SNP114  | AL1_14 | 0    | 1  | 5.3083   | 0.0225 | 3        | 167      | 73.6205  | 0.4961     | 0.016       |                  |     |
| lsm5  | SNP115  | AL1_15 | 0    | 1  | 4.9024   | 0.0282 | 3        | 167      | 73.5244  | 0.4967     | 0.0148      |                  |     |
| lsm5  | SNP116  | AL1_16 | 0    | 1  | 5.3084   | 0.0225 | 3        | 167      | 73.624   | 0.496      | 0.016       |                  |     |
| lsm5  | SNP117  | AL1_17 | 0    | 1  | 5.3085   | 0.0225 | 3        | 167      | 73.6267  | 0.496      | 0.016       |                  |     |
| lsm5  | SNP118  | AL1_18 | 0    | 1  | 5.3086   | 0.0225 | 3        | 167      | 73.6291  | 0.496      | 0.016       |                  |     |
| lsm5  | SNP119  | AL1_19 | 0    | 1  | 4.2306   | 0.0413 | 3        | 166      | 74.3825  | 0.4936     | 0.0129      |                  |     |
| lsm5  | SNP120  | AL1_2  | 0    | 1  | 0.7013   | 0.4037 | 3        | 144      | 48.8741  | 0.6669     | 0.0016      |                  |     |
| lsm5  | SNP120  | AL1_20 | 0    | 1  | 5.2876   | 0.0227 | 3        | 165      | 67.8737  | 0.5369     | 0.0148      |                  |     |
| lsm5  | SNP121  | AL1_21 | 0    | 1  | 5.2876   | 0.0227 | 3        | 165      | 67.8708  | 0.5369     | 0.0148      |                  |     |
| lsm5  | SNP122  | AL1_22 | 0    | 1  | 5.2875   | 0.0227 | 3        | 165      | 67.8681  | 0.5369     | 0.0148      | 0.0286           | 244 |
| lsm5  | SNP123  | AL1_23 | 0    | 1  | 4.8873   | 0.0284 | 3        | 164      | 68.6551  | 0.5299     | 0.014       |                  |     |
| lsm5  | SNP124  | AL1_24 | 0    | 1  | 4.8873   | 0.0284 | 3        | 164      | 68.6578  | 0.5299     | 0.014       |                  |     |
| lsm5  | SNP125  | AL1_25 | 0    | 1  | 4.3943   | 0.0376 | 3        | 164      | 68.859   | 0.5285     | 0.0126      |                  |     |
| lsm5  | SNP126  | AL1_26 | 0    | 1  | 3.9644   | 0.0481 | 3        | 163      | 68.6832  | 0.532      | 0.0114      |                  |     |
| lsm5  | SNP127  | AL1_27 | 0    | 1  | 5.8148   | 0.017  | 3        | 161      | 68.8553  | 0.5327     | 0.0169      |                  |     |
| lsm5  | SNP128  | AL1_28 | 0    | 1  | 3.7661   | 0.0541 | 3        | 160      | 70.571   | 0.5216     | 0.0113      |                  |     |
| lsm5  | SNP129  | AL1_29 | 0    | 1  | 4.6373   | 0.0328 | 3        | 160      | 70.4024  | 0.5227     | 0.0138      |                  |     |
| lsm5  | SNP103  | AL1_3  | 0    | 1  | 5.487    | 0.0205 | 3        | 147      | 51.8704  | 0.6417     | 0.0134      |                  |     |
| lsm5  | SNP130  | AL1_30 | 0    | 1  | 5.338    | 0.0221 | 3        | 160      | 69.3788  | 0.5297     | 0.0157      |                  |     |
| lsm5  | SNP131  | AL1_31 | 0    | 1  | 4.8249   | 0.0295 | 3        | 158      | 73.6628  | 0.502      | 0.0152      |                  |     |
| lsm5  | SNP104  | AL1_4  | 0    | 1  | 0.0692   | 0.7928 | 3        | 154      | 47.1344  | 0.669      | 1.49E-04    |                  |     |
| lsm5  | SNP105  | AL1_5  | 0    | 1  | 1.5961   | 0.2082 | 3        | 165      | 61.9905  | 0.5676     | 0.0042      |                  |     |
| lsm5  | SNP106  | AL1_6  | 0    | 2  | 2.4995   | 0.0853 | 4        | 163      | 62.4207  | 0.5682     | 0.0132      |                  |     |
| lsm5  | SNP107  | AL1_7  | 0    | 2  | 0.0295   | 0.9709 | 4        | 131      | 80.3196  | 0.4799     | 2.34E-04    |                  |     |
| lsm5  | SNP108  | AL1_8  | 0    | 1  | 0.1129   | 0.7374 | 3        | 133      | 89.829   | 0.4322     | 4.82E-04    |                  |     |
| lsm5  | SNP109  | AL1_9  | 0    | 1  | 0.6799   | 0.4111 | 3        | 133      | 86.6486  | 0.4523     | 0.0028      |                  |     |
| lsm5  | SNP100  | AL16_1 | 0    | 1  | ?        | ?      | 3        | 115      | ?        | ?          | ?           | 0.908            | 244 |
| lsm5  | SNP132  | AL2_1  | 0    | 1  | 0.7444   | 0.3896 | 3        | 150      | 71.6093  | 0.4274     | 0.0028      |                  |     |
| lsm5  | SNP141  | AL2_10 | 0    | 1  | 3.42E-04 | 0.9853 | 3        | 169      | 63.9212  | 0.5085     | 9.94E-07    |                  |     |
| lsm5  | SNP142  | AL2_11 | 0    | 1  | 0.6185   | 0.4326 | 3        | 177      | 60.225   | 0.5281     | 0.0016      |                  |     |
| lsm5  | SNP143  | AL2_12 | 0    | 2  | 4.8001   | 0.0093 | 4        | 175      | 58.4743  | 0.5431     | 0.0251      | 0.0215           | 244 |
| lsm5  | SNP144  | AL2_13 | 0    | 1  | 1.0858   | 0.2988 | 3        | 176      | 62.5136  | 0.5088     | 0.003       |                  |     |
| lsm5  | SNP145  | AL2_14 | 0    | 1  | 0.9232   | 0.338  | 3        | 176      | 60.356   | 0.5257     | 0.0025      |                  |     |
| lsm5  | SNP146  | AL2_15 | 0    | 1  | 0.6705   | 0.414  | 3        | 175      | 58.5668  | 0.5378     | 0.0018      |                  |     |
| lsm5  | SNP147  | AL2_16 | 0    | 1  | 0.933    | 0.3354 | 3        | 175      | 57.7418  | 0.5443     | 0.0024      |                  |     |
| lsm5  | SNP148  | AL2_17 | 0    | 1  | 0.4951   | 0.4826 | 3        | 169      | 55.3674  | 0.5551     | 0.0013      |                  |     |
| lsm5  | SNP133  | AL2_2  | 0    | 1  | 10.2463  | 0.0016 | 3        | 163      | 56.3496  | 0.5769     | 0.0266      | 0.0446           | 244 |
| lsm5  | SNP134  | AL2_3  | 0    | 1  | 1.1992   | 0.2751 | 3        | 164      | 69.0733  | 0.4781     | 0.0038      |                  |     |
| lsm5  | SNP135  | AL2_4  | 0    | 1  | 0.1629   | 0.687  | 3        | 166      | 65.3434  | 0.5016     | 4.89E-04    |                  |     |
| lsm5  | SNP136  | AL2_5  | 0    | 1  | 0.369    | 0.5444 | 3        | 166      | 67.328   | 0.4864     | 0.0011      |                  |     |
| lsm5  | SNP137  | AL2_6  | 0    | 1  | 0.9284   | 0.3367 | 3        | 166      | 64.5212  | 0.5078     | 0.0028      |                  |     |
| lsm5  | SNP138  | AL2_7  | 0    | 1  | 2.1429   | 0.1451 | 3        | 166      | 64.0527  | 0.5114     | 0.0063      |                  |     |
| lsm5  | SNP139  | AL2_8  | 0    | 1  | 0.3688   | 0.5445 | 3        | 166      | 67.3172  | 0.4865     | 0.0011      |                  |     |
| lsm5  | SNP140  | AL2_9  | 0    | 2  | 1.4494   | 0.2377 | 4        | 164      | 67.1047  | 0.4937     | 0.0089      |                  |     |
| lsm5  | SNP149  | AL3_1  | 0    | 1  | 0.2007   | 0.6548 | 3        | 158      | 65.8531  | 0.5669     | 5.50E-04    |                  |     |
| lsm5  | SNP150  | AL3_2  | 0    | 1  | 0.4221   | 0.5168 | 3        | 158      | 62.1201  | 0.5915     | 0.0011      |                  |     |
| lsm5  | SNP151  | AL3_3  | 0    | 1  | 0.2209   | 0.639  | 3        | 157      | 63.1974  | 0.587      | 5.81E-04    |                  |     |
| lsm5  | SNP152  | AL3_4  | 0    | 1  | 7.2841   | 0.0077 | 3        | 158      | 60.7926  | 0.6002     | 0.0184      | 0.0085           | 244 |
| lsm5  | SNP153  | AL3_5  | 0    | 2  | 1.4359   | 0.241  | 4        | 157      | 66.7658  | 0.5636     | 0.008       |                  |     |
| lsm5  | SNP154  | AL3_6  | 0    | 1  | 0.4534   | 0.5016 | 3        | 174      | 60.2697  | 0.6017     | 0.001       |                  |     |
| lsm5  | SNP155  | AL3_7  | 0    | 1  | 0.137    | 0.7118 | 3        | 173      | 61.8396  | 0.5871     | 3.27E-04    |                  |     |
| lsm5  | SNP156  | AL3_8  | 0    | 1  | 0.5003   | 0.4803 | 3        | 174      | 61.0198  | 0.5968     | 0.0012      |                  |     |
| lsm5  | SNP157  | AL3_9  | 0    | 2  | 0.3867   | 0.6799 | 4        | 173      | 61.2735  | 0.5974     | 0.0018      |                  |     |
| lsm5  | SNP158  | AL5_1  | 0    | 1  | 0.7869   | 0.3764 | 3        | 150      | 34.3407  | 0.7733     | 0.0012      |                  |     |
| lsm5  | SNP167  | AL5_10 | 0    | 1  | 0.0561   | 0.813  | 3        | 188      | 48.7933  | 0.6612     | 1.01E-04    |                  |     |
| lsm5  | SNP168  | AL5_11 | 0    | 1  | 0.2809   | 0.5968 | 3        | 192      | 45.4781  | 0.6798     | 4.68E-04    |                  |     |
| lsm5  | SNP169  | AL5_12 | 0    | 1  | 0.2809   | 0.5967 | 3        | 192      | 45.476   | 0.6798     | 4.68E-04    |                  |     |
| lsm5  | SNP170  | AL5_13 | 0    | 3  | 0.2099   | 0.8894 | 5        | 189      | 45.9831  | 0.6784     | 0.0011      |                  |     |
| lsm5  | SNP171  | AL5_14 | 0    | 1  | 0.3563   | 0.5512 | 3        | 192      | 45.3036  | 0.681      | 5.92E-04    |                  |     |
| lsm5  | SNP172  | AL5_15 | 0    | 3  | 1.0653   | 0.365  | 5        | 196      | 45.2979  | 0.6789     | 0.0052      |                  |     |
| lsm5  | SNP173  | AL5_16 | 0    | 1  | 1.7682   | 0.1851 | 3        | 199      | 44.9475  | 0.6765     | 0.0029      |                  |     |
| lsm5  | SNP174  | AL5_17 | 0    | 1  | 1.1399   | 0.287  | 3        | 199      | 46.1604  | 0.6678     | 0.0019      |                  |     |
| lsm5  | SNP175  | AL5_18 | 0    | 1  | 1.3257   | 0.251  | 3        | 199      | 46.2182  | 0.6674     | 0.0022      |                  |     |
| lsm5  | SNP176  | AL5_19 | 0    | 2  | 1.033    | 0.3578 | 4        | 198      | 45.4844  | 0.6743     | 0.0034      |                  |     |

|      |        |        |   |   |          |        |   |     |         |        |          |            |
|------|--------|--------|---|---|----------|--------|---|-----|---------|--------|----------|------------|
| lsm5 | SNP159 | AL5_2  | 0 | 1 | 0.9263   | 0.3373 | 3 | 153 | 38.2863 | 0.7541 | 0.0015   |            |
| lsm5 | SNP177 | AL5_20 | 0 | 1 | 0.1442   | 0.7045 | 3 | 199 | 46.176  | 0.6677 | 2.41E-04 |            |
| lsm5 | SNP178 | AL5_21 | 0 | 1 | 1.7673   | 0.1852 | 3 | 199 | 45.0287 | 0.6759 | 0.0029   |            |
| lsm5 | SNP179 | AL5_22 | 0 | 1 | 0.3369   | 0.5623 | 3 | 199 | 45.7658 | 0.6706 | 5.58E-04 |            |
| lsm5 | SNP180 | AL5_23 | 0 | 1 | 0.3348   | 0.5635 | 3 | 198 | 45.9968 | 0.6706 | 5.57E-04 |            |
| lsm5 | SNP181 | AL5_24 | 0 | 1 | 1.2022   | 0.2745 | 3 | 161 | 39.8887 | 0.7213 | 0.0021   |            |
| lsm5 | SNP160 | AL5_3  | 0 | 1 | 8.67E-05 | 0.9926 | 3 | 172 | 40.7157 | 0.7183 | 1.42E-07 |            |
| lsm5 | SNP161 | AL5_4  | 0 | 1 | 0.2617   | 0.6096 | 3 | 185 | 47.4053 | 0.669  | 4.68E-04 |            |
| lsm5 | SNP162 | AL5_5  | 0 | 1 | 0.0557   | 0.8137 | 3 | 185 | 47.7019 | 0.6669 | 1.00E-04 |            |
| lsm5 | SNP163 | AL5_6  | 0 | 1 | 0.0896   | 0.765  | 3 | 185 | 49.021  | 0.6582 | 1.66E-04 |            |
| lsm5 | SNP164 | AL5_7  | 0 | 1 | 0.4876   | 0.4859 | 3 | 185 | 49.2342 | 0.6567 | 9.05E-04 |            |
| lsm5 | SNP165 | AL5_8  | 0 | 1 | 0.2467   | 0.62   | 3 | 188 | 48.3121 | 0.6646 | 4.40E-04 |            |
| lsm5 | SNP166 | AL5_9  | 0 | 1 | 0.3566   | 0.5511 | 3 | 188 | 48.4857 | 0.6634 | 6.39E-04 |            |
| lsm5 | SNP182 | AL8_1  | 0 | 1 | 2.1505   | 0.1443 | 3 | 174 | 62.2118 | 0.5444 | 0.0056   |            |
| lsm5 | SNP191 | AL8_10 | 0 | 1 | 0.2691   | 0.6046 | 3 | 187 | 71.6032 | 0.468  | 7.65E-04 |            |
| lsm5 | SNP192 | AL8_11 | 0 | 1 | 1.2435   | 0.2663 | 3 | 182 | 75.1254 | 0.4597 | 0.0037   |            |
| lsm5 | SNP193 | AL8_12 | 0 | 1 | 0.8384   | 0.361  | 3 | 188 | 73.6113 | 0.458  | 0.0024   |            |
| lsm5 | SNP194 | AL8_13 | 0 | 1 | 0.8383   | 0.361  | 3 | 188 | 73.6137 | 0.458  | 0.0024   |            |
| lsm5 | SNP195 | AL8_14 | 0 | 1 | 1.2076   | 0.2732 | 3 | 187 | 71.3542 | 0.4786 | 0.0034   |            |
| lsm5 | SNP196 | AL8_15 | 0 | 2 | 0.5217   | 0.5944 | 4 | 188 | 74.7471 | 0.4522 | 0.003    |            |
| lsm5 | SNP197 | AL8_16 | 0 | 1 | 0.536    | 0.465  | 3 | 189 | 73.6024 | 0.4578 | 0.0015   |            |
| lsm5 | SNP198 | AL8_17 | 0 | 1 | 0.9081   | 0.3418 | 3 | 189 | 73.2372 | 0.4604 | 0.0026   |            |
| lsm5 | SNP199 | AL8_18 | 0 | 2 | 0.0553   | 0.9463 | 4 | 188 | 74.7662 | 0.4521 | 3.22E-04 |            |
| lsm5 | SNP200 | AL8_19 | 0 | 1 | 0.908    | 0.3419 | 3 | 189 | 73.2436 | 0.4604 | 0.0026   |            |
| lsm5 | SNP183 | AL8_2  | 0 | 1 | 0.3794   | 0.5389 | 3 | 154 | 79.0593 | 0.4581 | 0.0013   |            |
| lsm5 | SNP201 | AL8_20 | 0 | 1 | 0.908    | 0.3419 | 3 | 189 | 73.2417 | 0.4604 | 0.0026   |            |
| lsm5 | SNP202 | AL8_21 | 0 | 1 | 0.9181   | 0.3392 | 3 | 188 | 73.2142 | 0.4634 | 0.0026   |            |
| lsm5 | SNP203 | AL8_22 | 0 | 1 | 0.9085   | 0.3417 | 3 | 189 | 73.164  | 0.461  | 0.0026   |            |
| lsm5 | SNP204 | AL8_23 | 0 | 1 | 0.4501   | 0.5031 | 3 | 188 | 73.9218 | 0.4543 | 0.0013   |            |
| lsm5 | SNP205 | AL8_24 | 0 | 1 | 1.1823   | 0.2783 | 3 | 186 | 74.5099 | 0.4514 | 0.0035   |            |
| lsm5 | SNP206 | AL8_25 | 0 | 1 | 1.0644   | 0.3036 | 3 | 182 | 62.7657 | 0.5316 | 0.0027   |            |
| lsm5 | SNP207 | AL8_26 | 0 | 1 | 0.0363   | 0.8492 | 3 | 151 | 49.0603 | 0.6475 | 8.47E-05 |            |
| lsm5 | SNP184 | AL8_3  | 0 | 1 | 0.9582   | 0.329  | 3 | 178 | 68.7775 | 0.4981 | 0.0027   |            |
| lsm5 | SNP185 | AL8_4  | 0 | 1 | 0.9582   | 0.329  | 3 | 178 | 68.7755 | 0.4981 | 0.0027   |            |
| lsm5 | SNP186 | AL8_5  | 0 | 1 | 0.965    | 0.3273 | 3 | 177 | 69.9602 | 0.4888 | 0.0028   |            |
| lsm5 | SNP187 | AL8_6  | 0 | 1 | 0.9581   | 0.329  | 3 | 178 | 68.8132 | 0.4978 | 0.0027   |            |
| lsm5 | SNP188 | AL8_7  | 0 | 1 | 0.9684   | 0.3264 | 3 | 185 | 70.4466 | 0.4804 | 0.0027   |            |
| lsm5 | SNP189 | AL8_8  | 0 | 1 | 0.9684   | 0.3264 | 3 | 185 | 70.4488 | 0.4804 | 0.0027   |            |
| lsm5 | SNP190 | AL8_9  | 0 | 1 | 0.967    | 0.3267 | 3 | 187 | 70.7342 | 0.4744 | 0.0027   |            |
| lsm5 | SNP24  | AI9_1  | 0 | 1 | 0.065    | 0.7989 | 3 | 243 | 66.6711 | 0.5363 | 1.24E-04 |            |
| lsm5 | SNP25  | AI9_2  | 0 | 1 | 0.067    | 0.796  | 3 | 244 | 69.4448 | 0.5156 | 1.33E-04 |            |
| lsm5 | SNP208 | anti1  | 0 | 1 | 3.7295   | 0.0547 | 3 | 226 | 73.3622 | 0.4753 | 0.0087   |            |
| lsm5 | SNP217 | anti10 | 0 | 2 | 0.2053   | 0.8146 | 4 | 195 | 63.398  | 0.5585 | 9.30E-04 |            |
| lsm5 | SNP218 | anti11 | 0 | 1 | 0.3097   | 0.5785 | 3 | 195 | 51.0542 | 0.6292 | 5.89E-04 |            |
| lsm5 | SNP219 | anti12 | 0 | 1 | 0.3097   | 0.5785 | 3 | 195 | 51.0511 | 0.6292 | 5.89E-04 |            |
| lsm5 | SNP220 | anti13 | 0 | 1 | 0.0531   | 0.818  | 3 | 195 | 51.1172 | 0.6287 | 1.01E-04 |            |
| lsm5 | SNP221 | anti14 | 0 | 1 | 0.0807   | 0.7767 | 3 | 187 | 50.8865 | 0.6217 | 1.63E-04 |            |
| lsm5 | SNP209 | anti2  | 0 | 1 | 0.3594   | 0.5495 | 3 | 229 | 79.7618 | 0.4327 | 8.90E-04 |            |
| lsm5 | SNP210 | anti3  | 0 | 1 | 1.2712   | 0.2607 | 3 | 229 | 78.7088 | 0.4402 | 0.0031   |            |
| lsm5 | SNP211 | anti4  | 0 | 1 | 0.0301   | 0.8623 | 3 | 221 | 75.9858 | 0.4543 | 7.44E-05 |            |
| lsm5 | SNP212 | anti5  | 0 | 1 | 0.1794   | 0.6723 | 3 | 216 | 70.9696 | 0.5024 | 4.13E-04 |            |
| lsm5 | SNP213 | anti6  | 0 | 1 | 0.2502   | 0.6175 | 3 | 216 | 70.2803 | 0.5072 | 5.71E-04 |            |
| lsm5 | SNP214 | anti7  | 0 | 2 | 1.0763   | 0.3428 | 4 | 204 | 72.8999 | 0.4897 | 0.0054   |            |
| lsm5 | SNP215 | anti8  | 0 | 1 | 0.0146   | 0.9038 | 3 | 205 | 74.6827 | 0.4747 | 3.75E-05 |            |
| lsm5 | SNP216 | anti9  | 0 | 1 | 0.6905   | 0.407  | 3 | 195 | 62.271  | 0.565  | 0.0015   |            |
| lsm5 | SNP26  | ASL1   | 0 | 1 | 3.0134   | 0.0841 | 3 | 209 | 72.9141 | 0.4742 | 0.0076   |            |
| lsm5 | SNP35  | ASL10  | 0 | 1 | 1.7329   | 0.1893 | 3 | 234 | 73.6477 | 0.4761 | 0.0039   |            |
| lsm5 | SNP36  | ASL11  | 0 | 1 | 6.0274   | 0.0148 | 3 | 239 | 77.2337 | 0.4447 | 0.014    | 0.0117 244 |
| lsm5 | SNP37  | ASL12  | 0 | 2 | 3.6939   | 0.0263 | 4 | 238 | 73.6163 | 0.473  | 0.0164   | 0.0409 244 |
| lsm5 | SNP38  | ASL13  | 0 | 1 | 1.1654   | 0.2814 | 3 | 239 | 76.1525 | 0.4525 | 0.0027   |            |
| lsm5 | SNP39  | ASL14  | 0 | 1 | 7.265    | 0.0075 | 3 | 239 | 77.4648 | 0.4431 | 0.0169   | 0.0057 244 |
| lsm5 | SNP40  | ASL15  | 0 | 2 | 2.9516   | 0.0542 | 4 | 238 | 77.1522 | 0.4477 | 0.0137   | 0.0475 243 |
| lsm5 | SNP41  | ASL16  | 0 | 1 | 5.3381   | 0.0218 | 3 | 219 | 79.0606 | 0.4219 | 0.0141   | 0.0236 244 |
| lsm5 | SNP42  | ASL17  | 0 | 1 | 6.0291   | 0.0148 | 3 | 239 | 77.2701 | 0.4445 | 0.014    | 0.0117 244 |
| lsm5 | SNP43  | ASL18  | 0 | 1 | 6.029    | 0.0148 | 3 | 239 | 77.2688 | 0.4445 | 0.014    | 0.0117 244 |
| lsm5 | SNP44  | ASL19  | 0 | 1 | 6.029    | 0.0148 | 3 | 239 | 77.2675 | 0.4445 | 0.014    | 0.0117 244 |
| lsm5 | SNP27  | ASL2   | 0 | 1 | 0.4247   | 0.5153 | 3 | 211 | 75.2946 | 0.4588 | 0.0011   |            |
| lsm5 | SNP45  | ASL20  | 0 | 1 | 5.0279   | 0.0259 | 3 | 239 | 77.583  | 0.4422 | 0.0117   | 0.0178 244 |
| lsm5 | SNP46  | ASL21  | 0 | 1 | 8.807    | 0.0033 | 3 | 239 | 76.7235 | 0.4484 | 0.0203   | 0.0028 244 |
| lsm5 | SNP47  | ASL22  | 0 | 1 | 8.8072   | 0.0033 | 3 | 239 | 76.7257 | 0.4484 | 0.0203   | 0.0028 244 |
| lsm5 | SNP48  | ASL23  | 0 | 1 | 8.8073   | 0.0033 | 3 | 239 | 76.7277 | 0.4484 | 0.0203   | 0.0028 244 |
| lsm5 | SNP49  | ASL24  | 0 | 1 | 8.6248   | 0.0036 | 3 | 238 | 76.9948 | 0.4487 | 0.02     | 0.0029 244 |
| lsm5 | SNP50  | ASL25  | 0 | 1 | 8.855    | 0.0032 | 3 | 238 | 71.7591 | 0.4862 | 0.0191   | 0.0086 244 |
| lsm5 | SNP51  | ASL26  | 0 | 1 | 9.5791   | 0.0022 | 3 | 213 | 56.9474 | 0.592  | 0.0183   | 0.0009 244 |
| lsm5 | SNP52  | ASL27  | 0 | 1 | 7.9905   | 0.0051 | 3 | 216 | 56.3211 | 0.5932 | 0.015    | 0.0021 244 |
| lsm5 | SNP53  | ASL28  | 0 | 1 | 7.9904   | 0.0051 | 3 | 216 | 56.3185 | 0.5932 | 0.015    | 0.0021 244 |
| lsm5 | SNP54  | ASL29  | 0 | 1 | 4.7596   | 0.0302 | 3 | 222 | 67.0453 | 0.5273 | 0.0101   | 0.0362 244 |
| lsm5 | SNP28  | ASL3   | 0 | 1 | 3.4107   | 0.0661 | 3 | 224 | 76.9957 | 0.4431 | 0.0085   |            |
| lsm5 | SNP55  | ASL30  | 0 | 2 | 1.3654   | 0.2575 | 4 | 219 | 69.9188 | 0.5114 | 0.0061   |            |
| lsm5 | SNP56  | ASL31  | 0 | 1 | 6.0091   | 0.015  | 3 | 210 | 66.4507 | 0.5216 | 0.0137   | 0.016 244  |
| lsm5 | SNP57  | ASL32  | 0 | 1 | 4.3749   | 0.0377 | 3 | 210 | 67.4615 | 0.5143 | 0.0101   | 0.0258 244 |
| lsm5 | SNP58  | ASL33  | 0 | 1 | 8.35E-04 | 0.977  | 3 | 220 | 87.6664 | 0.3736 | 2.38E-06 |            |
| lsm5 | SNP59  | ASL34  | 0 | 1 | 0.347    | 0.5564 | 3 | 222 | 86.3072 | 0.3966 | 9.43E-04 |            |
| lsm5 | SNP60  | ASL35  | 0 | 1 | 0.5781   | 0.4479 | 3 | 224 | 85.3223 | 0.3953 | 0.0016   |            |
| lsm5 | SNP61  | ASL36  | 0 | 3 | 0.6552   | 0.5805 | 5 | 219 | 81.2007 | 0.4333 | 0.0051   |            |
| lsm5 | SNP62  | ASL37  | 0 | 2 | 1.6235   | 0.2    | 4 | 188 | 88.1646 | 0.3861 | 0.0106   |            |
| lsm5 | SNP63  | ASL38  | 0 | 3 | 1.246    | 0.2944 | 5 | 186 | 89.0664 | 0.3861 | 0.0123   |            |
| lsm5 | SNP64  | ASL39  | 0 | 2 | 1.2473   | 0.2893 | 4 | 217 | 84.0323 | 0.416  | 0.0067   |            |
| lsm5 | SNP29  | ASL4   | 0 | 1 | 0.2984   | 0.5854 | 3 | 234 | 73.3998 | 0.4779 | 6.66E-04 |            |
| lsm5 | SNP65  | ASL40  | 0 | 1 | 7.1174   | 0.0082 | 3 | 217 | 81.6767 | 0.4324 | 0.0186   | 0.0369 244 |
| lsm5 | SNP66  | ASL41  | 0 | 1 | 0.334    | 0.5639 | 3 | 216 | 80.1306 | 0.442  | 8.63E-04 |            |

|      |        |       |   |   |        |        |   |     |          |        |          |
|------|--------|-------|---|---|--------|--------|---|-----|----------|--------|----------|
| lsm5 | SNP67  | ASL42 | 0 | 1 | 3.4175 | 0.0659 | 3 | 208 | 83.8793  | 0.4264 | 0.0094   |
| lsm5 | SNP68  | ASL43 | 0 | 1 | 3.0369 | 0.0829 | 3 | 207 | 85.2194  | 0.4181 | 0.0085   |
| lsm5 | SNP69  | ASL44 | 0 | 1 | 3.0369 | 0.0829 | 3 | 207 | 85.2213  | 0.418  | 0.0085   |
| lsm5 | SNP70  | ASL45 | 0 | 1 | 3.1243 | 0.0786 | 3 | 205 | 85.4838  | 0.4176 | 0.0089   |
| lsm5 | SNP71  | ASL46 | 0 | 1 | 1.9303 | 0.1663 | 3 | 196 | 92.4276  | 0.3795 | 0.0061   |
| lsm5 | SNP72  | ASL47 | 0 | 1 | 1.9304 | 0.1663 | 3 | 196 | 92.4299  | 0.3795 | 0.0061   |
| lsm5 | SNP73  | ASL48 | 0 | 1 | 1.408  | 0.2368 | 3 | 195 | 93.1059  | 0.3728 | 0.0045   |
| lsm5 | SNP74  | ASL49 | 0 | 1 | 1.408  | 0.2368 | 3 | 195 | 93.1087  | 0.3728 | 0.0045   |
| lsm5 | SNP30  | ASL5  | 0 | 1 | 3.0003 | 0.0846 | 3 | 235 | 74.905   | 0.4649 | 0.0068   |
| lsm5 | SNP75  | ASL50 | 0 | 1 | 1.4081 | 0.2368 | 3 | 195 | 93.1114  | 0.3727 | 0.0045   |
| lsm5 | SNP76  | ASL51 | 0 | 2 | 1.655  | 0.1938 | 4 | 193 | 97.0528  | 0.352  | 0.0111   |
| lsm5 | SNP77  | ASL52 | 0 | 1 | 1.0508 | 0.3067 | 3 | 174 | 96.3917  | 0.3719 | 0.0038   |
| lsm5 | SNP78  | ASL53 | 0 | 1 | 1.3458 | 0.2477 | 3 | 167 | 100.0129 | 0.3508 | 0.0052   |
| lsm5 | SNP31  | ASL6  | 0 | 1 | 4.0883 | 0.0443 | 3 | 234 | 76.3808  | 0.4562 | 0.0095   |
| lsm5 | SNP32  | ASL7  | 0 | 1 | 4.0883 | 0.0443 | 3 | 234 | 76.382   | 0.4562 | 0.0095   |
| lsm5 | SNP33  | ASL8  | 0 | 1 | 3.1252 | 0.0784 | 3 | 235 | 75.3144  | 0.462  | 0.0072   |
| lsm5 | SNP34  | ASL9  | 0 | 1 | 3.9967 | 0.0467 | 3 | 235 | 75.6896  | 0.4593 | 0.0092   |
| lsm5 | SNP1   | AUX01 | 0 | 1 | 0.0613 | 0.8047 | 3 | 181 | 81.5337  | 0.393  | 2.06E-04 |
| lsm5 | SNP2   | AUX02 | 0 | 1 | 0.0916 | 0.7625 | 3 | 189 | 79.6598  | 0.4026 | 2.90E-04 |
| lsm5 | SNP3   | AUX03 | 0 | 1 | 1.4741 | 0.2262 | 3 | 191 | 80.6143  | 0.3923 | 0.0047   |
| lsm5 | SNP4   | AUX04 | 0 | 1 | 0.0225 | 0.8809 | 3 | 192 | 80.3261  | 0.394  | 7.10E-05 |
| lsm5 | SNP5   | AUX05 | 0 | 2 | 0.8358 | 0.4351 | 4 | 194 | 81.0244  | 0.3979 | 0.0052   |
| lsm5 | SNP6   | AUX06 | 0 | 2 | 0.6669 | 0.5145 | 4 | 194 | 82.0763  | 0.3901 | 0.0042   |
| lsm5 | SNP7   | AUX07 | 0 | 1 | 3.0946 | 0.0801 | 3 | 193 | 85.8213  | 0.3599 | 0.0103   |
| lsm5 | SNP8   | AUX08 | 0 | 2 | 0.6918 | 0.502  | 4 | 185 | 85.2952  | 0.3785 | 0.0046   |
| lsm5 | SNP9   | AUX09 | 0 | 1 | 0.8718 | 0.3517 | 3 | 185 | 90.1564  | 0.3337 | 0.0031   |
| lsm5 | SNP10  | AUX10 | 0 | 2 | 0.2034 | 0.8162 | 4 | 184 | 90.3575  | 0.3358 | 0.0015   |
| lsm5 | SNP11  | AUX11 | 0 | 2 | 1.5853 | 0.2077 | 4 | 184 | 91.5332  | 0.3272 | 0.0116   |
| lsm5 | SNP12  | AUX12 | 0 | 1 | 1.1914 | 0.2765 | 3 | 185 | 89.6329  | 0.3376 | 0.0043   |
| lsm5 | SNP13  | AUX13 | 0 | 2 | 0.2965 | 0.7438 | 4 | 183 | 90.3685  | 0.3367 | 0.0021   |
| lsm5 | SNP14  | AUX14 | 0 | 2 | 0.0358 | 0.9648 | 4 | 183 | 90.4534  | 0.3361 | 2.60E-04 |
| lsm5 | SNP15  | AUX15 | 0 | 1 | 3.5297 | 0.0619 | 3 | 181 | 93.6841  | 0.3125 | 0.0134   |
| lsm5 | SNP16  | AUX16 | 0 | 2 | 0.2332 | 0.7922 | 4 | 177 | 88.5241  | 0.3442 | 0.0017   |
| lsm5 | SNP17  | AUX17 | 0 | 1 | 1.6436 | 0.2015 | 3 | 178 | 90.7632  | 0.3238 | 0.0062   |
| lsm5 | SNP18  | AUX18 | 0 | 1 | 0.0019 | 0.9657 | 3 | 177 | 87.7789  | 0.345  | 6.85E-06 |
| lsm5 | SNP19  | AUX19 | 0 | 1 | 0.1137 | 0.7364 | 3 | 174 | 89.0433  | 0.3322 | 4.36E-04 |
| lsm5 | SNP20  | AUX20 | 0 | 1 | 2.1381 | 0.1455 | 3 | 169 | 91.1517  | 0.3276 | 0.0085   |
| lsm5 | SNP21  | AUX21 | 0 | 1 | 0.1289 | 0.72   | 3 | 169 | 91.4184  | 0.3257 | 5.14E-04 |
| lsm5 | SNP22  | AUX22 | 0 | 2 | 0.9085 | 0.4051 | 4 | 164 | 94.0424  | 0.3239 | 0.0075   |
| lsm5 | SNP23  | AUX23 | 0 | 2 | 0.2296 | 0.7951 | 4 | 164 | 93.1876  | 0.3301 | 0.0019   |
| lsm5 | SNP222 | cp1   | 0 | 1 | 1.5938 | 0.2081 | 3 | 221 | 49.9212  | 0.6339 | 0.0026   |
| lsm5 | SNP231 | cp10  | 0 | 1 | 0.2338 | 0.6292 | 3 | 232 | 59.8789  | 0.5643 | 4.39E-04 |
| lsm5 | SNP232 | cp11  | 0 | 1 | 0.1629 | 0.6869 | 3 | 232 | 59.8953  | 0.5641 | 3.06E-04 |
| lsm5 | SNP233 | cp12  | 0 | 1 | 0.7403 | 0.3905 | 3 | 229 | 59.2437  | 0.5707 | 0.0014   |
| lsm5 | SNP234 | cp13  | 0 | 1 | 0.2119 | 0.6458 | 3 | 208 | 46.4331  | 0.6498 | 3.57E-04 |
| lsm5 | SNP235 | cp14  | 0 | 1 | 0.3486 | 0.5555 | 3 | 224 | 63.5108  | 0.5367 | 7.21E-04 |
| lsm5 | SNP223 | cp2   | 0 | 1 | 0.4954 | 0.4823 | 3 | 230 | 58.0502  | 0.5768 | 9.11E-04 |
| lsm5 | SNP224 | cp3   | 0 | 1 | 0.1692 | 0.6812 | 3 | 232 | 60.0725  | 0.5629 | 3.19E-04 |
| lsm5 | SNP225 | cp4   | 0 | 1 | 0.1129 | 0.7372 | 3 | 232 | 59.864   | 0.5644 | 2.12E-04 |
| lsm5 | SNP226 | cp5   | 0 | 2 | 0.2896 | 0.7488 | 4 | 231 | 59.6352  | 0.5679 | 0.0011   |
| lsm5 | SNP227 | cp6   | 0 | 1 | 0.0885 | 0.7664 | 3 | 232 | 59.75    | 0.5652 | 1.66E-04 |
| lsm5 | SNP228 | cp7   | 0 | 1 | 0.4548 | 0.5007 | 3 | 232 | 59.4659  | 0.5673 | 8.48E-04 |
| lsm5 | SNP229 | cp8   | 0 | 1 | 0.0958 | 0.7572 | 3 | 231 | 60.4818  | 0.5603 | 1.82E-04 |
| lsm5 | SNP230 | cp9   | 0 | 1 | 0.2338 | 0.6292 | 3 | 232 | 59.8809  | 0.5643 | 4.39E-04 |
| lsm5 | SNP236 | Fe1   | 0 | 1 | 1.4709 | 0.2266 | 3 | 207 | 81.605   | 0.4265 | 0.0041   |
| lsm5 | SNP245 | Fe10  | 0 | 1 | 1.1227 | 0.2907 | 3 | 183 | 73.2906  | 0.495  | 0.0031   |
| lsm5 | SNP246 | Fe11  | 0 | 1 | 0.7603 | 0.3844 | 3 | 183 | 73.4353  | 0.494  | 0.0021   |
| lsm5 | SNP237 | Fe2   | 0 | 1 | 0.1225 | 0.7267 | 3 | 222 | 88.5511  | 0.3862 | 3.39E-04 |
| lsm5 | SNP238 | Fe3   | 0 | 1 | 0.7729 | 0.3803 | 3 | 222 | 89.3334  | 0.3807 | 0.0022   |
| lsm5 | SNP239 | Fe4   | 0 | 1 | 0.847  | 0.3584 | 3 | 223 | 88.8497  | 0.3815 | 0.0023   |
| lsm5 | SNP240 | Fe5   | 0 | 1 | 1.5562 | 0.2135 | 3 | 220 | 87.9831  | 0.3827 | 0.0044   |
| lsm5 | SNP241 | Fe6   | 0 | 1 | 1.5274 | 0.2178 | 3 | 219 | 88.3791  | 0.3827 | 0.0043   |
| lsm5 | SNP242 | Fe7   | 0 | 1 | 0.435  | 0.5102 | 3 | 210 | 89.8157  | 0.3705 | 0.0013   |
| lsm5 | SNP243 | Fe8   | 0 | 1 | 0.0243 | 0.8763 | 3 | 198 | 84.5492  | 0.4132 | 7.20E-05 |
| lsm5 | SNP244 | Fe9   | 0 | 1 | 2.0706 | 0.1518 | 3 | 196 | 82.1679  | 0.4334 | 0.006    |
| lsm5 | SNP247 | Fum1  | 0 | 1 | 2.5985 | 0.1083 | 3 | 234 | 80.8447  | 0.4361 | 0.0063   |
| lsm5 | SNP248 | Fum2  | 0 | 2 | 2.1609 | 0.1174 | 4 | 249 | 76.469   | 0.4606 | 0.0094   |
| lsm5 | SNP249 | Fum3  | 0 | 1 | 3.745  | 0.0541 | 3 | 252 | 79.9286  | 0.4396 | 0.0083   |
| lsm5 | SNP250 | Fum4  | 0 | 1 | 4.8782 | 0.0281 | 3 | 251 | 78.2382  | 0.4456 | 0.0108   |
| lsm5 | SNP251 | Fum5  | 0 | 1 | 3.0818 | 0.0804 | 3 | 249 | 76.7216  | 0.455  | 0.0067   |
| lsm5 | SNP252 | Fum6  | 0 | 1 | 3.4248 | 0.0654 | 3 | 249 | 77.0739  | 0.4525 | 0.0075   |
| lsm5 | SNP253 | Fum7  | 0 | 1 | 5.8353 | 0.0164 | 3 | 249 | 76.5609  | 0.4561 | 0.0127   |
| lsm5 | SNP254 | Fum8  | 0 | 1 | 5.3545 | 0.0215 | 3 | 249 | 76.7853  | 0.4545 | 0.0117   |
| lsm5 | SNP255 | Ger1  | 0 | 1 | 4.829  | 0.0294 | 3 | 163 | 79.3176  | 0.4295 | 0.0169   |
| lsm5 | SNP264 | Ger10 | 0 | 1 | 3.2009 | 0.0754 | 3 | 166 | 78.9186  | 0.4245 | 0.0111   |
| lsm5 | SNP265 | Ger11 | 0 | 1 | 3.2009 | 0.0754 | 3 | 166 | 78.9209  | 0.4245 | 0.0111   |
| lsm5 | SNP266 | Ger12 | 0 | 1 | 3.2009 | 0.0754 | 3 | 166 | 78.923   | 0.4245 | 0.0111   |
| lsm5 | SNP267 | Ger13 | 0 | 1 | 3.2009 | 0.0754 | 3 | 166 | 78.9249  | 0.4244 | 0.0111   |
| lsm5 | SNP268 | Ger14 | 0 | 1 | 3.1489 | 0.0778 | 3 | 167 | 78.3111  | 0.4282 | 0.0108   |
| lsm5 | SNP269 | Ger15 | 0 | 1 | 3.1489 | 0.0778 | 3 | 167 | 78.3085  | 0.4283 | 0.0108   |
| lsm5 | SNP270 | Ger16 | 0 | 1 | 0.2129 | 0.6451 | 3 | 167 | 81.5369  | 0.4047 | 7.59E-04 |
| lsm5 | SNP271 | Ger17 | 0 | 1 | 0.3437 | 0.5585 | 3 | 167 | 82.0261  | 0.4011 | 0.0012   |
| lsm5 | SNP272 | Ger18 | 0 | 1 | 3.5976 | 0.0596 | 3 | 166 | 78.8093  | 0.4115 | 0.0128   |
| lsm5 | SNP273 | Ger19 | 0 | 1 | 3.4753 | 0.0641 | 3 | 165 | 79.4174  | 0.4071 | 0.0125   |
| lsm5 | SNP256 | Ger2  | 0 | 1 | 0.5696 | 0.4515 | 3 | 164 | 79.886   | 0.4219 | 0.002    |
| lsm5 | SNP274 | Ger20 | 0 | 1 | 1.1344 | 0.2884 | 3 | 165 | 76.874   | 0.4261 | 0.0039   |
| lsm5 | SNP275 | Ger21 | 0 | 1 | 3.5976 | 0.0596 | 3 | 166 | 78.8064  | 0.4115 | 0.0128   |
| lsm5 | SNP276 | Ger22 | 0 | 1 | 3.5976 | 0.0596 | 3 | 166 | 78.8084  | 0.4115 | 0.0128   |
| lsm5 | SNP277 | Ger23 | 0 | 1 | 3.5976 | 0.0596 | 3 | 166 | 78.8104  | 0.4114 | 0.0128   |
| lsm5 | SNP278 | Ger24 | 0 | 1 | 0.0993 | 0.7531 | 3 | 166 | 82.0959  | 0.3869 | 3.67E-04 |
| lsm5 | SNP279 | Ger25 | 0 | 1 | 2.8134 | 0.0954 | 3 | 164 | 79.361   | 0.41   | 0.0101   |

0.5481 244

0.7558 244

|        |        |        |   |   |          |        |   |     |         |        |          |        |     |
|--------|--------|--------|---|---|----------|--------|---|-----|---------|--------|----------|--------|-----|
| lsm5   | SNP280 | Ger26  | 0 | 2 | 2.3062   | 0.1031 | 4 | 151 | 85.3361 | 0.3687 | 0.0193   |        |     |
| lsm5   | SNP257 | Ger3   | 0 | 1 | 3.1873   | 0.0761 | 3 | 164 | 81.8208 | 0.4079 | 0.0115   |        |     |
| lsm5   | SNP258 | Ger4   | 0 | 1 | 0.2207   | 0.6391 | 3 | 164 | 85.0708 | 0.3844 | 8.28E-04 |        |     |
| lsm5   | SNP259 | Ger5   | 0 | 1 | 0.8541   | 0.3567 | 3 | 165 | 77.6627 | 0.4369 | 0.0029   |        |     |
| lsm5   | SNP260 | Ger6   | 0 | 1 | 0.6245   | 0.4305 | 3 | 165 | 78.1353 | 0.4335 | 0.0021   |        |     |
| lsm5   | SNP261 | Ger7   | 0 | 1 | 3.1831   | 0.0762 | 3 | 165 | 79.9816 | 0.4201 | 0.0112   |        |     |
| lsm5   | SNP262 | Ger8   | 0 | 1 | 3.1831   | 0.0762 | 3 | 165 | 79.9837 | 0.4201 | 0.0112   |        |     |
| lsm5   | SNP263 | Ger9   | 0 | 1 | 0.6339   | 0.4271 | 3 | 166 | 77.0583 | 0.438  | 0.0021   |        |     |
| lsm5   | SNP281 | ICD1   | 0 | 1 | 1.3407   | 0.2481 | 3 | 225 | 86.8502 | 0.399  | 0.0036   |        |     |
| lsm5   | SNP290 | ICD10  | 0 | 1 | 0.5306   | 0.467  | 3 | 249 | 77.0174 | 0.4634 | 0.0011   |        |     |
| lsm5   | SNP291 | ICD11  | 0 | 1 | 0.297    | 0.5863 | 3 | 249 | 77.0905 | 0.4629 | 6.41E-04 |        |     |
| lsm5   | SNP292 | ICD12  | 0 | 1 | 0.0057   | 0.9399 | 3 | 247 | 77.288  | 0.465  | 1.23E-05 |        |     |
| lsm5   | SNP293 | ICD13  | 0 | 1 | 0.6954   | 0.4051 | 3 | 248 | 76.9242 | 0.4662 | 0.0015   |        |     |
| lsm5   | SNP294 | ICD14  | 0 | 1 | 0.334    | 0.5638 | 3 | 240 | 73.8477 | 0.487  | 7.14E-04 |        |     |
| lsm5   | SNP282 | ICD2   | 0 | 2 | 0.2478   | 0.7807 | 4 | 233 | 87.9324 | 0.3821 | 0.0013   |        |     |
| lsm5   | SNP283 | ICD3   | 0 | 2 | 2.9987   | 0.0518 | 4 | 233 | 85.964  | 0.3959 | 0.0155   |        |     |
| lsm5   | SNP284 | ICD4   | 0 | 1 | 3.0396   | 0.0826 | 3 | 234 | 84.993  | 0.4003 | 0.0078   |        |     |
| lsm5   | SNP285 | ICD5   | 0 | 1 | 0.2128   | 0.645  | 3 | 234 | 86.1151 | 0.3924 | 5.52E-04 |        |     |
| lsm5   | SNP286 | ICD6   | 0 | 2 | 0.347    | 0.7072 | 4 | 222 | 97.1876 | 0.2848 | 0.0022   |        |     |
| lsm5   | SNP287 | ICD7   | 0 | 1 | 4.0652   | 0.045  | 3 | 223 | 94.1679 | 0.3039 | 0.0127   |        |     |
| lsm5   | SNP288 | ICD8   | 0 | 1 | 0.0429   | 0.8361 | 3 | 249 | 76.75   | 0.4653 | 9.21E-05 |        |     |
| lsm5   | SNP289 | ICD9   | 0 | 1 | 0.0429   | 0.8361 | 3 | 249 | 76.7522 | 0.4653 | 9.21E-05 |        |     |
| lsm5   | SNP295 | ISL1   | 0 | 1 | 5.3583   | 0.0216 | 3 | 214 | 85.0949 | 0.4002 | 0.015    |        |     |
| lsm5   | SNP296 | ISL2   | 0 | 1 | 1.8436   | 0.176  | 3 | 214 | 89.7514 | 0.3674 | 0.0054   |        |     |
| lsm5   | SNP297 | ISL3   | 0 | 1 | 0.3471   | 0.5564 | 3 | 212 | 89.3226 | 0.3758 | 0.001    |        |     |
| lsm5   | SNP298 | ISL4   | 0 | 1 | 0.1938   | 0.6602 | 3 | 210 | 89.2481 | 0.3819 | 5.70E-04 | 0.9917 | 244 |
| lsm5   | SNP299 | ISL5   | 0 | 1 | 3.5373   | 0.0614 | 3 | 203 | 88.0067 | 0.4005 | 0.0104   |        |     |
| lsm5   | SNP300 | ISL6   | 0 | 1 | 2.79     | 0.0964 | 3 | 201 | 97.8119 | 0.3286 | 0.0093   |        |     |
| lsm5   | SNP301 | ME1    | 0 | 1 | 1.1112   | 0.2929 | 3 | 238 | 79.2156 | 0.4223 | 0.0027   | 0.1303 | 244 |
| lsm5   | SNP310 | ME10   | 0 | 1 | 2.756    | 0.0983 | 3 | 229 | 75.2022 | 0.4495 | 0.0066   | 0.3929 | 244 |
| lsm5   | SNP311 | ME11   | 0 | 1 | 4.2052   | 0.0414 | 3 | 228 | 75.2806 | 0.4476 | 0.0102   | 0.3669 | 244 |
| lsm5   | SNP312 | ME12   | 0 | 3 | 1.4229   | 0.2369 | 5 | 225 | 75.545  | 0.453  | 0.0104   | 0.7142 | 244 |
| lsm5   | SNP302 | ME2    | 0 | 1 | 0.3714   | 0.5428 | 3 | 239 | 78.5795 | 0.4245 | 8.94E-04 |        |     |
| lsm5   | SNP303 | ME3    | 0 | 1 | 0.4136   | 0.5208 | 3 | 239 | 79.5402 | 0.4175 | 0.001    |        |     |
| lsm5   | SNP304 | ME4    | 0 | 1 | 5.2703   | 0.0226 | 3 | 239 | 76.1278 | 0.4425 | 0.0123   | 0.0078 | 244 |
| lsm5   | SNP305 | ME5    | 0 | 1 | 3.9009   | 0.0494 | 3 | 239 | 74.7787 | 0.4524 | 0.0089   |        |     |
| lsm5   | SNP306 | ME6    | 0 | 3 | 3.0127   | 0.0308 | 5 | 237 | 74.8904 | 0.4561 | 0.0207   | 0.1093 | 242 |
| lsm5   | SNP307 | ME7    | 0 | 1 | 3.8111   | 0.0521 | 3 | 236 | 74.6606 | 0.4483 | 0.0089   | 0.4373 | 244 |
| lsm5   | SNP308 | ME8    | 0 | 1 | 0.3772   | 0.5397 | 3 | 236 | 75.6678 | 0.4408 | 8.94E-04 |        |     |
| lsm5   | SNP309 | ME9    | 0 | 1 | 3.0702   | 0.0811 | 3 | 229 | 76.6064 | 0.4393 | 0.0075   |        |     |
| lsm5   | SNP313 | P13K1  | 0 | 1 | 5.5297   | 0.0195 | 3 | 238 | 77.602  | 0.4289 | 0.0133   | 0.0149 | 244 |
| lsm5   | SNP322 | P13K10 | 0 | 1 | 0.0712   | 0.7899 | 3 | 193 | 55.9515 | 0.5815 | 1.54E-04 |        |     |
| lsm5   | SNP314 | P13K2  | 0 | 1 | 0.2147   | 0.6435 | 3 | 238 | 74.8436 | 0.4492 | 4.97E-04 |        |     |
| lsm5   | SNP315 | P13K3  | 0 | 1 | 0.3175   | 0.5737 | 3 | 238 | 74.8661 | 0.4491 | 7.35E-04 |        |     |
| lsm5   | SNP316 | P13K4  | 0 | 1 | 1.63E-04 | 0.9898 | 3 | 238 | 74.7011 | 0.4503 | 3.76E-07 |        |     |
| lsm5   | SNP317 | P13K5  | 0 | 1 | 0.0788   | 0.7792 | 3 | 238 | 74.9294 | 0.4486 | 1.83E-04 |        |     |
| lsm5   | SNP318 | P13K6  | 0 | 1 | 0.2063   | 0.6501 | 3 | 238 | 75.0769 | 0.4475 | 4.79E-04 |        |     |
| lsm5   | SNP319 | P13K7  | 0 | 1 | 0.0032   | 0.9553 | 3 | 238 | 74.9278 | 0.4486 | 7.30E-06 |        |     |
| lsm5   | SNP320 | P13K8  | 0 | 1 | 0.21     | 0.6472 | 3 | 236 | 75.1171 | 0.4494 | 4.90E-04 |        |     |
| lsm5   | SNP321 | P13K9  | 0 | 1 | 0.0019   | 0.965  | 3 | 235 | 74.8323 | 0.4538 | 4.49E-06 |        |     |
| lsm5   | SNP323 | PME1   | 0 | 1 | 1.0019   | 0.3178 | 3 | 253 | 74.2349 | 0.4824 | 0.002    |        |     |
| lsm5   | SNP324 | PME2   | 0 | 1 | 7.6932   | 0.006  | 3 | 253 | 74.9318 | 0.4776 | 0.0159   | 0.0096 | 244 |
| lsm5   | SNP325 | PME3   | 0 | 1 | 2.656    | 0.1044 | 3 | 249 | 70.3137 | 0.515  | 0.0052   | 0.1581 | 244 |
| lsm5   | SNP326 | SAH1   | 0 | 1 | 4.7992   | 0.0297 | 3 | 193 | 75.0362 | 0.487  | 0.0128   | 0.0847 | 244 |
| lsm5   | SNP327 | SAH2   | 0 | 1 | 3.489    | 0.0633 | 3 | 193 | 76.006  | 0.4804 | 0.0094   | 0.1347 | 244 |
| lsm5   | SNP328 | SAH3   | 0 | 1 | 0.8357   | 0.3618 | 3 | 193 | 76.9749 | 0.4738 | 0.0023   |        |     |
| lsm5   | SNP329 | SAH4   | 0 | 1 | 0.5204   | 0.4715 | 3 | 193 | 77.0992 | 0.4729 | 0.0014   |        |     |
| lsm5   | SNP330 | SAH5   | 0 | 2 | 3.0733   | 0.0486 | 4 | 187 | 70.1461 | 0.5232 | 0.0157   | 0.0671 | 243 |
| lsm5   | SNP331 | SAH6   | 0 | 1 | 2.0299   | 0.1568 | 3 | 121 | 87.8011 | 0.2915 | 0.0119   |        |     |
| lsm5+c | SNP79  | ABC1   | 0 | 1 | 0.7057   | 0.4019 | 4 | 199 | 43.5175 | 0.671  | 0.0012   |        |     |
| lsm5+c | SNP88  | ABC10  | 0 | 1 | 0.0881   | 0.7669 | 4 | 217 | 44.4592 | 0.6524 | 1.41E-04 |        |     |
| lsm5+c | SNP89  | ABC11  | 0 | 1 | 0.0881   | 0.7669 | 4 | 217 | 44.4616 | 0.6524 | 1.41E-04 |        |     |
| lsm5+c | SNP90  | ABC12  | 0 | 1 | 1.0917   | 0.2973 | 4 | 217 | 43.9327 | 0.6565 | 0.0017   |        |     |
| lsm5+c | SNP91  | ABC13  | 0 | 1 | 0.0888   | 0.766  | 4 | 215 | 45.1687 | 0.6498 | 1.45E-04 |        |     |
| lsm5+c | SNP92  | ABC14  | 0 | 1 | 0.1415   | 0.7071 | 4 | 217 | 44.1555 | 0.6548 | 2.25E-04 |        |     |
| lsm5+c | SNP93  | ABC15  | 0 | 1 | 0.1736   | 0.6773 | 4 | 212 | 44.6715 | 0.6476 | 2.89E-04 |        |     |
| lsm5+c | SNP94  | ABC16  | 0 | 1 | 0.0291   | 0.8646 | 4 | 208 | 45.7143 | 0.6431 | 5.00E-05 |        |     |
| lsm5+c | SNP95  | ABC17  | 0 | 1 | 0.7577   | 0.3851 | 4 | 208 | 45.3966 | 0.6456 | 0.0013   |        |     |
| lsm5+c | SNP96  | ABC18  | 0 | 1 | 0.7577   | 0.3851 | 4 | 208 | 45.3941 | 0.6456 | 0.0013   |        |     |
| lsm5+c | SNP97  | ABC19  | 0 | 2 | 0.5943   | 0.5529 | 5 | 207 | 47.2798 | 0.6327 | 0.0021   |        |     |
| lsm5+c | SNP80  | ABC2   | 0 | 1 | 0.7058   | 0.4019 | 4 | 199 | 43.5159 | 0.671  | 0.0012   |        |     |
| lsm5+c | SNP98  | ABC20  | 0 | 1 | 0.0011   | 0.9739 | 4 | 208 | 45.5811 | 0.6442 | 1.84E-06 |        |     |
| lsm5+c | SNP99  | ABC21  | 0 | 1 | 0.709    | 0.4008 | 4 | 205 | 46.0181 | 0.6385 | 0.0013   |        |     |
| lsm5+c | SNP81  | ABC3   | 0 | 1 | 0.0096   | 0.9222 | 4 | 203 | 44.1237 | 0.6629 | 1.59E-05 |        |     |
| lsm5+c | SNP82  | ABC4   | 0 | 3 | 0.2181   | 0.8838 | 6 | 210 | 44.2429 | 0.6594 | 0.0011   |        |     |
| lsm5+c | SNP83  | ABC5   | 0 | 1 | 0.0119   | 0.9133 | 4 | 217 | 44.4217 | 0.6527 | 1.90E-05 |        |     |
| lsm5+c | SNP84  | ABC6   | 0 | 1 | 0.1013   | 0.7505 | 4 | 217 | 44.4413 | 0.6525 | 1.62E-04 |        |     |
| lsm5+c | SNP85  | ABC7   | 0 | 1 | 0.088    | 0.767  | 4 | 217 | 44.4504 | 0.6525 | 1.41E-04 |        |     |
| lsm5+c | SNP86  | ABC8   | 0 | 1 | 0.088    | 0.767  | 4 | 217 | 44.4536 | 0.6524 | 1.41E-04 |        |     |
| lsm5+c | SNP87  | ABC9   | 0 | 1 | 0.088    | 0.767  | 4 | 217 | 44.4565 | 0.6524 | 1.41E-04 |        |     |
| lsm5+c | SNP101 | AL1_1  | 0 | 1 | 2.4216   | 0.1221 | 4 | 132 | 2.0605  | 0.9851 | 2.73E-04 |        |     |
| lsm5+c | SNP110 | AL1_10 | 0 | 2 | 0.5311   | 0.5893 | 5 | 120 | 83.6297 | 0.4413 | 0.0049   |        |     |
| lsm5+c | SNP111 | AL1_11 | 0 | 1 | 0.0641   | 0.8006 | 4 | 121 | 82.9068 | 0.4415 | 2.96E-04 |        |     |
| lsm5+c | SNP112 | AL1_12 | 0 | 1 | 3.6464   | 0.0581 | 4 | 151 | 71.5983 | 0.4803 | 0.0126   |        |     |
| lsm5+c | SNP113 | AL1_13 | 0 | 1 | 5.0452   | 0.0261 | 4 | 151 | 70.2039 | 0.4904 | 0.017    |        |     |
| lsm5+c | SNP114 | AL1_14 | 0 | 1 | 5.0452   | 0.0261 | 4 | 151 | 70.2032 | 0.4904 | 0.017    |        |     |
| lsm5+c | SNP115 | AL1_15 | 0 | 1 | 1.4598   | 0.2289 | 4 | 151 | 70.247  | 0.4901 | 0.0049   |        |     |
| lsm5+c | SNP116 | AL1_16 | 0 | 1 | 5.0437   | 0.0262 | 4 | 151 | 70.1598 | 0.4907 | 0.017    |        |     |
| lsm5+c | SNP117 | AL1_17 | 0 | 1 | 5.0437   | 0.0262 | 4 | 151 | 70.1616 | 0.4907 | 0.017    |        |     |
| lsm5+c | SNP118 | AL1_18 | 0 | 1 | 5.0438   | 0.0262 | 4 | 151 | 70.1632 | 0.4907 | 0.017    |        |     |

|        |        |        |   |   |        |        |   |     |         |        |          |
|--------|--------|--------|---|---|--------|--------|---|-----|---------|--------|----------|
| lsm5+c | SNP119 | AL1_19 | 0 | 1 | 1.2412 | 0.267  | 4 | 150 | 71.2417 | 0.4861 | 0.0043   |
| lsm5+c | SNP102 | AL1_2  | 0 | 1 | 1.0287 | 0.3123 | 4 | 133 | 59.1773 | 0.5718 | 0.0033   |
| lsm5+c | SNP120 | AL1_20 | 0 | 1 | 1.8514 | 0.1757 | 4 | 149 | 62.9402 | 0.5441 | 0.0057   |
| lsm5+c | SNP121 | AL1_21 | 0 | 1 | 1.8514 | 0.1757 | 4 | 149 | 62.9377 | 0.5441 | 0.0057   |
| lsm5+c | SNP122 | AL1_22 | 0 | 1 | 1.8513 | 0.1757 | 4 | 149 | 62.9354 | 0.5441 | 0.0057   |
| lsm5+c | SNP123 | AL1_23 | 0 | 1 | 1.3189 | 0.2526 | 4 | 148 | 63.4824 | 0.5386 | 0.0041   |
| lsm5+c | SNP124 | AL1_24 | 0 | 1 | 1.319  | 0.2526 | 4 | 148 | 63.4838 | 0.5386 | 0.0041   |
| lsm5+c | SNP125 | AL1_25 | 0 | 1 | 2.3855 | 0.1246 | 4 | 148 | 62.3285 | 0.547  | 0.0073   |
| lsm5+c | SNP126 | AL1_26 | 0 | 1 | 2.3855 | 0.1246 | 4 | 148 | 62.3273 | 0.547  | 0.0073   |
| lsm5+c | SNP127 | AL1_27 | 0 | 1 | 1.8246 | 0.1789 | 4 | 146 | 64.3048 | 0.5343 | 0.0058   |
| lsm5+c | SNP128 | AL1_28 | 0 | 1 | 1.9136 | 0.1687 | 4 | 145 | 63.67   | 0.539  | 0.0061   |
| lsm5+c | SNP129 | AL1_29 | 0 | 1 | 2.1243 | 0.1471 | 4 | 145 | 63.0054 | 0.5438 | 0.0067   |
| lsm5+c | SNP103 | AL1_3  | 0 | 1 | 5.1644 | 0.0246 | 4 | 136 | 59.6875 | 0.5617 | 0.0166   |
| lsm5+c | SNP130 | AL1_30 | 0 | 1 | 1.4497 | 0.2305 | 4 | 145 | 64.7119 | 0.5314 | 0.0047   |
| lsm5+c | SNP131 | AL1_31 | 0 | 1 | 2.1087 | 0.1486 | 4 | 144 | 63.7878 | 0.5354 | 0.0068   |
| lsm5+c | SNP104 | AL1_4  | 0 | 1 | 0.5198 | 0.4721 | 4 | 142 | 55.3869 | 0.5902 | 0.0015   |
| lsm5+c | SNP105 | AL1_5  | 0 | 1 | 0.5795 | 0.4477 | 4 | 150 | 68.8599 | 0.5032 | 0.0019   |
| lsm5+c | SNP106 | AL1_6  | 0 | 2 | 2.5433 | 0.082  | 5 | 148 | 68.5197 | 0.5102 | 0.0168   |
| lsm5+c | SNP107 | AL1_7  | 0 | 2 | 0.3144 | 0.7308 | 5 | 120 | 83.5776 | 0.4416 | 0.0029   |
| lsm5+c | SNP108 | AL1_8  | 0 | 1 | 0.5092 | 0.4769 | 4 | 121 | 82.2234 | 0.4461 | 0.0023   |
| lsm5+c | SNP109 | AL1_9  | 0 | 1 | 1.782  | 0.1844 | 4 | 121 | 81.37   | 0.4518 | 0.0081   |
| lsm5+c | SNP100 | AL16_1 | 0 | 1 |        |        | 4 | 104 |         |        |          |
| lsm5+c | SNP132 | AL2_1  | 0 | 1 | 2.0292 | 0.1566 | 4 | 136 | 55.7728 | 0.5447 | 0.0068   |
| lsm5+c | SNP141 | AL2_10 | 0 | 1 | 0.0544 | 0.8159 | 4 | 154 | 45.0818 | 0.6381 | 1.28E-04 |
| lsm5+c | SNP142 | AL2_11 | 0 | 1 | 0.1757 | 0.6756 | 4 | 162 | 41.4207 | 0.6611 | 3.68E-04 |
| lsm5+c | SNP143 | AL2_12 | 0 | 2 | 1.9618 | 0.144  | 5 | 160 | 42.574  | 0.6529 | 0.0085   |
| lsm5+c | SNP144 | AL2_13 | 0 | 1 | 0.8304 | 0.3635 | 4 | 161 | 42.2879 | 0.6531 | 0.0018   |
| lsm5+c | SNP145 | AL2_14 | 0 | 1 | 0.4732 | 0.4925 | 4 | 161 | 41.7565 | 0.6574 | 0.001    |
| lsm5+c | SNP146 | AL2_15 | 0 | 1 | 0.1324 | 0.7164 | 4 | 160 | 39.7221 | 0.6721 | 2.71E-04 |
| lsm5+c | SNP147 | AL2_16 | 0 | 1 | 0.4745 | 0.4919 | 4 | 160 | 39.2299 | 0.6761 | 9.60E-04 |
| lsm5+c | SNP148 | AL2_17 | 0 | 1 | 0.358  | 0.5505 | 4 | 155 | 40.0043 | 0.6723 | 7.57E-04 |
| lsm5+c | SNP133 | AL2_2  | 0 | 1 | 2.9884 | 0.086  | 4 | 148 | 44.6066 | 0.6506 | 0.0071   |
| lsm5+c | SNP134 | AL2_3  | 0 | 1 | 0.5432 | 0.4623 | 4 | 149 | 47.8    | 0.6231 | 0.0014   |
| lsm5+c | SNP135 | AL2_4  | 0 | 1 | 0.0047 | 0.9457 | 4 | 151 | 46.5268 | 0.6295 | 1.14E-05 |
| lsm5+c | SNP136 | AL2_5  | 0 | 1 | 0.1314 | 0.7175 | 4 | 151 | 47.0276 | 0.6256 | 3.26E-04 |
| lsm5+c | SNP137 | AL2_6  | 0 | 1 | 0.3197 | 0.5726 | 4 | 151 | 46.0211 | 0.6336 | 7.76E-04 |
| lsm5+c | SNP138 | AL2_7  | 0 | 1 | 0.9232 | 0.3382 | 4 | 151 | 45.8361 | 0.635  | 0.0022   |
| lsm5+c | SNP139 | AL2_8  | 0 | 1 | 0.1314 | 0.7175 | 4 | 151 | 47.0377 | 0.6255 | 3.26E-04 |
| lsm5+c | SNP140 | AL2_9  | 0 | 2 | 0.6494 | 0.5238 | 5 | 149 | 47.0636 | 0.6298 | 0.0032   |
| lsm5+c | SNP149 | AL3_1  | 0 | 1 | 0.2861 | 0.5936 | 4 | 146 | 49.7445 | 0.663  | 6.60E-04 |
| lsm5+c | SNP150 | AL3_2  | 0 | 1 | 2.1808 | 0.1419 | 4 | 146 | 42.1131 | 0.7147 | 0.0043   |
| lsm5+c | SNP151 | AL3_3  | 0 | 1 | 1.6573 | 0.2    | 4 | 145 | 45.3376 | 0.6949 | 0.0035   |
| lsm5+c | SNP152 | AL3_4  | 0 | 1 | 5.5358 | 0.02   | 4 | 146 | 45.2624 | 0.6933 | 0.0116   |
| lsm5+c | SNP153 | AL3_5  | 0 | 2 | 1.3291 | 0.2679 | 5 | 145 | 50.985  | 0.6569 | 0.0063   |
| lsm5+c | SNP154 | AL3_6  | 0 | 1 | 0.0229 | 0.88   | 4 | 162 | 47.314  | 0.68   | 4.51E-05 |
| lsm5+c | SNP155 | AL3_7  | 0 | 1 | 1.4231 | 0.2346 | 4 | 161 | 46.6075 | 0.6807 | 0.0028   |
| lsm5+c | SNP156 | AL3_8  | 0 | 1 | 0.0705 | 0.7909 | 4 | 162 | 47.3275 | 0.6799 | 1.39E-04 |
| lsm5+c | SNP157 | AL3_9  | 0 | 2 | 0.0669 | 0.9353 | 5 | 161 | 47.6044 | 0.68   | 2.66E-04 |
| lsm5+c | SNP158 | AL5_1  | 0 | 1 | 0.4593 | 0.4991 | 4 | 139 | 41.0304 | 0.7208 | 9.23E-04 |
| lsm5+c | SNP167 | AL5_10 | 0 | 1 | 0.223  | 0.6374 | 4 | 174 | 49.6374 | 0.6473 | 4.52E-04 |
| lsm5+c | SNP168 | AL5_11 | 0 | 1 | 0.1897 | 0.6637 | 4 | 178 | 47.0167 | 0.6611 | 3.61E-04 |
| lsm5+c | SNP169 | AL5_12 | 0 | 1 | 0.1898 | 0.6636 | 4 | 178 | 47.014  | 0.6611 | 3.61E-04 |
| lsm5+c | SNP170 | AL5_13 | 0 | 3 | 0.0838 | 0.9688 | 6 | 175 | 48.0928 | 0.656  | 4.94E-04 |
| lsm5+c | SNP171 | AL5_14 | 0 | 1 | 0.1796 | 0.6723 | 4 | 178 | 47.1857 | 0.6599 | 3.43E-04 |
| lsm5+c | SNP172 | AL5_15 | 0 | 3 | 0.0845 | 0.9685 | 6 | 182 | 51.5893 | 0.6257 | 5.21E-04 |
| lsm5+c | SNP173 | AL5_16 | 0 | 1 | 0.3292 | 0.5668 | 4 | 185 | 49.8471 | 0.6324 | 6.54E-04 |
| lsm5+c | SNP174 | AL5_17 | 0 | 1 | 0.0267 | 0.8703 | 4 | 185 | 50.3968 | 0.6284 | 5.37E-05 |
| lsm5+c | SNP175 | AL5_18 | 0 | 1 | 0.2989 | 0.5852 | 4 | 185 | 50.2601 | 0.6294 | 5.99E-04 |
| lsm5+c | SNP176 | AL5_19 | 0 | 2 | 0.2078 | 0.8126 | 5 | 184 | 50.1247 | 0.6324 | 8.30E-04 |
| lsm5+c | SNP159 | AL5_2  | 0 | 1 | 0.3831 | 0.5369 | 4 | 142 | 42.7287 | 0.7175 | 7.62E-04 |
| lsm5+c | SNP177 | AL5_20 | 0 | 1 | 0.0646 | 0.7997 | 4 | 185 | 50.2937 | 0.6291 | 1.29E-04 |
| lsm5+c | SNP178 | AL5_21 | 0 | 1 | 0.3292 | 0.5668 | 4 | 185 | 49.8485 | 0.6324 | 6.54E-04 |
| lsm5+c | SNP179 | AL5_22 | 0 | 1 | 0.2902 | 0.5908 | 4 | 185 | 49.7982 | 0.6328 | 5.76E-04 |
| lsm5+c | SNP180 | AL5_23 | 0 | 1 | 0.2798 | 0.5975 | 4 | 184 | 49.6496 | 0.6358 | 5.54E-04 |
| lsm5+c | SNP181 | AL5_24 | 0 | 1 | 1.0956 | 0.2969 | 4 | 149 | 40.6481 | 0.7063 | 0.0022   |
| lsm5+c | SNP160 | AL5_3  | 0 | 1 | 0.2297 | 0.6324 | 4 | 161 | 41.8099 | 0.7019 | 4.25E-04 |
| lsm5+c | SNP161 | AL5_4  | 0 | 1 | 0.484  | 0.4876 | 4 | 171 | 41.8428 | 0.7006 | 8.47E-04 |
| lsm5+c | SNP162 | AL5_5  | 0 | 1 | 0.0424 | 0.8371 | 4 | 171 | 41.9883 | 0.6996 | 7.45E-05 |
| lsm5+c | SNP163 | AL5_6  | 0 | 1 | 0.1055 | 0.7457 | 4 | 171 | 49.9889 | 0.6423 | 2.21E-04 |
| lsm5+c | SNP164 | AL5_7  | 0 | 1 | 0.2975 | 0.5862 | 4 | 171 | 49.7594 | 0.6439 | 6.19E-04 |
| lsm5+c | SNP165 | AL5_8  | 0 | 1 | 0.1469 | 0.702  | 4 | 174 | 48.8203 | 0.6531 | 2.93E-04 |
| lsm5+c | SNP166 | AL5_9  | 0 | 1 | 0.015  | 0.9026 | 4 | 174 | 49.4675 | 0.6485 | 3.04E-05 |
| lsm5+c | SNP182 | AL8_1  | 0 | 1 | 0.6317 | 0.4279 | 4 | 159 | 43.2475 | 0.6795 | 0.0013   |
| lsm5+c | SNP191 | AL8_10 | 0 | 1 | 0.0311 | 0.8601 | 4 | 172 | 52.8646 | 0.6029 | 7.19E-05 |
| lsm5+c | SNP192 | AL8_11 | 0 | 1 | 0.4356 | 0.5101 | 4 | 168 | 58.2914 | 0.5771 | 0.0011   |
| lsm5+c | SNP193 | AL8_12 | 0 | 1 | 0.1731 | 0.6779 | 4 | 173 | 55.811  | 0.5854 | 4.15E-04 |
| lsm5+c | SNP194 | AL8_13 | 0 | 1 | 0.1731 | 0.6779 | 4 | 173 | 55.8076 | 0.5854 | 4.15E-04 |
| lsm5+c | SNP195 | AL8_14 | 0 | 1 | 0.1628 | 0.6871 | 4 | 172 | 54.5144 | 0.5983 | 3.80E-04 |
| lsm5+c | SNP196 | AL8_15 | 0 | 2 | 0.1742 | 0.8403 | 5 | 173 | 56.5734 | 0.5816 | 8.43E-04 |
| lsm5+c | SNP197 | AL8_16 | 0 | 1 | 0.0234 | 0.8786 | 4 | 174 | 55.3676 | 0.5882 | 5.54E-05 |
| lsm5+c | SNP198 | AL8_17 | 0 | 1 | 0.1988 | 0.6563 | 4 | 174 | 55.5134 | 0.5871 | 4.72E-04 |
| lsm5+c | SNP199 | AL8_18 | 0 | 2 | 0.356  | 0.701  | 5 | 173 | 55.8505 | 0.587  | 0.0017   |
| lsm5+c | SNP200 | AL8_19 | 0 | 1 | 0.1987 | 0.6563 | 4 | 174 | 55.6027 | 0.5864 | 4.72E-04 |
| lsm5+c | SNP183 | AL8_2  | 0 | 1 | 0.0166 | 0.8977 | 4 | 141 | 53.9013 | 0.628  | 4.38E-05 |
| lsm5+c | SNP201 | AL8_20 | 0 | 1 | 0.1987 | 0.6563 | 4 | 174 | 55.5996 | 0.5865 | 4.72E-04 |
| lsm5+c | SNP202 | AL8_21 | 0 | 1 | 0.1962 | 0.6583 | 4 | 173 | 55.7441 | 0.5878 | 4.68E-04 |
| lsm5+c | SNP203 | AL8_22 | 0 | 1 | 0.1988 | 0.6562 | 4 | 174 | 55.5034 | 0.5872 | 4.72E-04 |
| lsm5+c | SNP204 | AL8_23 | 0 | 1 | 0.0031 | 0.9555 | 4 | 173 | 52.4448 | 0.6088 | 7.05E-06 |
| lsm5+c | SNP205 | AL8_24 | 0 | 1 | 0.3667 | 0.5456 | 4 | 171 | 54.3861 | 0.5954 | 8.68E-04 |
| lsm5+c | SNP206 | AL8_25 | 0 | 1 | 0.3752 | 0.541  | 4 | 167 | 45.9805 | 0.6531 | 7.79E-04 |
| lsm5+c | SNP207 | AL8_26 | 0 | 1 | 0.3489 | 0.5557 | 4 | 138 | 33.1693 | 0.7598 | 6.07E-04 |

|        |        |        |   |   |        |        |   |     |         |        |          |            |
|--------|--------|--------|---|---|--------|--------|---|-----|---------|--------|----------|------------|
| lsm5+c | SNP184 | AL8_3  | 0 | 1 | 0.1423 | 0.7065 | 4 | 163 | 48.2348 | 0.6444 | 3.11E-04 |            |
| lsm5+c | SNP185 | AL8_4  | 0 | 1 | 0.1423 | 0.7065 | 4 | 163 | 48.2313 | 0.6444 | 3.11E-04 |            |
| lsm5+c | SNP186 | AL8_5  | 0 | 1 | 0.1403 | 0.7084 | 4 | 162 | 50.0618 | 0.6306 | 3.20E-04 |            |
| lsm5+c | SNP187 | AL8_6  | 0 | 1 | 0.1423 | 0.7065 | 4 | 163 | 48.2091 | 0.6445 | 3.10E-04 |            |
| lsm5+c | SNP188 | AL8_7  | 0 | 1 | 0.2126 | 0.6453 | 4 | 170 | 53.3566 | 0.6021 | 4.98E-04 |            |
| lsm5+c | SNP189 | AL8_8  | 0 | 1 | 0.2126 | 0.6453 | 4 | 170 | 53.3588 | 0.6021 | 4.98E-04 |            |
| lsm5+c | SNP190 | AL8_9  | 0 | 1 | 0.2259 | 0.6352 | 4 | 172 | 52.7605 | 0.6037 | 5.20E-04 |            |
| lsm5+c | SNP24  | AI9_1  | 0 | 1 | 0.0035 | 0.9529 | 4 | 225 | 53.0835 | 0.6094 | 6.06E-06 |            |
| lsm5+c | SNP25  | AI9_2  | 0 | 1 | 0.0029 | 0.9572 | 4 | 226 | 54.1289 | 0.6003 | 5.11E-06 |            |
| lsm5+c | SNP208 | anti1  | 0 | 1 | 0.1556 | 0.6936 | 4 | 205 | 53.2121 | 0.594  | 3.08E-04 |            |
| lsm5+c | SNP217 | anti10 | 0 | 2 | 0.5701 | 0.5665 | 5 | 177 | 43.5429 | 0.6715 | 0.0021   |            |
| lsm5+c | SNP218 | anti11 | 0 | 1 | 0.024  | 0.877  | 4 | 178 | 42.5788 | 0.6769 | 4.36E-05 |            |
| lsm5+c | SNP219 | anti12 | 0 | 1 | 0.024  | 0.877  | 4 | 178 | 42.5758 | 0.6769 | 4.36E-05 |            |
| lsm5+c | SNP220 | anti13 | 0 | 1 | 1.2296 | 0.269  | 4 | 178 | 43.5909 | 0.6692 | 0.0023   |            |
| lsm5+c | SNP221 | anti14 | 0 | 1 | 0.1936 | 0.6605 | 4 | 170 | 41.4309 | 0.6768 | 3.68E-04 |            |
| lsm5+c | SNP209 | anti2  | 0 | 1 | 0.4867 | 0.4862 | 4 | 208 | 56.5363 | 0.5728 | 1.00E-03 |            |
| lsm5+c | SNP210 | anti3  | 0 | 1 | 4.383  | 0.0375 | 4 | 208 | 55.2468 | 0.5825 | 0.0088   |            |
| lsm5+c | SNP211 | anti4  | 0 | 1 | 3.344  | 0.0689 | 4 | 202 | 58.4615 | 0.5606 | 0.0073   |            |
| lsm5+c | SNP212 | anti5  | 0 | 1 | 0.1371 | 0.7116 | 4 | 196 | 46.7649 | 0.6502 | 2.45E-04 |            |
| lsm5+c | SNP213 | anti6  | 0 | 1 | 0.8925 | 0.346  | 4 | 196 | 47.3234 | 0.6461 | 0.0016   |            |
| lsm5+c | SNP214 | anti7  | 0 | 2 | 0.512  | 0.6001 | 5 | 184 | 47.3619 | 0.6453 | 0.002    |            |
| lsm5+c | SNP215 | anti8  | 0 | 1 | 1.0159 | 0.3148 | 4 | 185 | 48.545  | 0.6345 | 0.002    |            |
| lsm5+c | SNP216 | anti9  | 0 | 1 | 0.1491 | 0.6999 | 4 | 176 | 44.1591 | 0.6773 | 2.73E-04 |            |
| lsm5+c | SNP26  | ASL1   | 0 | 1 | 2.8087 | 0.0954 | 4 | 194 | 62.7086 | 0.5483 | 0.0065   |            |
| lsm5+c | SNP35  | ASL10  | 0 | 1 | 0.9307 | 0.3357 | 4 | 217 | 58.7409 | 0.5657 | 0.0019   |            |
| lsm5+c | SNP36  | ASL11  | 0 | 1 | 5.0492 | 0.0256 | 4 | 222 | 62.5449 | 0.5322 | 0.0106   |            |
| lsm5+c | SNP37  | ASL12  | 0 | 2 | 3.5464 | 0.0305 | 5 | 221 | 61.3177 | 0.5434 | 0.0147   |            |
| lsm5+c | SNP38  | ASL13  | 0 | 1 | 0.4815 | 0.4885 | 4 | 222 | 61.7654 | 0.538  | 0.001    |            |
| lsm5+c | SNP39  | ASL14  | 0 | 1 | 6.8691 | 0.0094 | 4 | 222 | 62.8912 | 0.5296 | 0.0146   | 0.1502 225 |
| lsm5+c | SNP40  | ASL15  | 0 | 2 | 2.4814 | 0.086  | 5 | 221 | 62.6158 | 0.5337 | 0.0105   |            |
| lsm5+c | SNP41  | ASL16  | 0 | 1 | 7.0685 | 0.0085 | 4 | 202 | 64.5037 | 0.5082 | 0.0172   | 0.0088 225 |
| lsm5+c | SNP42  | ASL17  | 0 | 1 | 5.051  | 0.0256 | 4 | 222 | 62.5813 | 0.5319 | 0.0107   | 0.0191 225 |
| lsm5+c | SNP43  | ASL18  | 0 | 1 | 5.0509 | 0.0256 | 4 | 222 | 62.5798 | 0.5319 | 0.0106   | 0.0191 225 |
| lsm5+c | SNP44  | ASL19  | 0 | 1 | 5.0508 | 0.0256 | 4 | 222 | 62.5785 | 0.5319 | 0.0106   | 0.0191 225 |
| lsm5+c | SNP27  | ASL2   | 0 | 1 | 0.1871 | 0.6658 | 4 | 196 | 65.3296 | 0.5315 | 4.47E-04 |            |
| lsm5+c | SNP45  | ASL20  | 0 | 1 | 4.0596 | 0.0451 | 4 | 222 | 62.817  | 0.5301 | 0.0086   |            |
| lsm5+c | SNP46  | ASL21  | 0 | 1 | 6.5019 | 0.0114 | 4 | 222 | 61.9493 | 0.5366 | 0.0136   | 0.0107 225 |
| lsm5+c | SNP47  | ASL22  | 0 | 1 | 6.5019 | 0.0115 | 4 | 222 | 61.9481 | 0.5366 | 0.0136   | 0.0107 225 |
| lsm5+c | SNP48  | ASL23  | 0 | 1 | 6.5018 | 0.0115 | 4 | 222 | 61.9469 | 0.5366 | 0.0136   | 0.0107 225 |
| lsm5+c | SNP49  | ASL24  | 0 | 1 | 6.0807 | 0.0144 | 4 | 221 | 61.8234 | 0.5396 | 0.0127   | 0.0139 225 |
| lsm5+c | SNP50  | ASL25  | 0 | 1 | 6.3575 | 0.0124 | 4 | 221 | 58.5211 | 0.5642 | 0.0125   | 0.0309 225 |
| lsm5+c | SNP51  | ASL26  | 0 | 1 | 7.7416 | 0.0059 | 4 | 199 | 53.4162 | 0.5983 | 0.0156   | 0.004 225  |
| lsm5+c | SNP52  | ASL27  | 0 | 1 | 6.803  | 0.0098 | 4 | 201 | 53.0686 | 0.5991 | 0.0136   | 0.0055 225 |
| lsm5+c | SNP53  | ASL28  | 0 | 1 | 6.8029 | 0.0098 | 4 | 201 | 53.0661 | 0.5991 | 0.0136   | 0.0055 225 |
| lsm5+c | SNP54  | ASL29  | 0 | 1 | 2.3174 | 0.1295 | 4 | 205 | 50.3262 | 0.6175 | 0.0043   |            |
| lsm5+c | SNP28  | ASL3   | 0 | 1 | 1.2969 | 0.2561 | 4 | 209 | 64.4414 | 0.5224 | 0.003    |            |
| lsm5+c | SNP55  | ASL30  | 0 | 2 | 1.8149 | 0.1655 | 5 | 202 | 52.3846 | 0.6058 | 0.0071   |            |
| lsm5+c | SNP56  | ASL31  | 0 | 1 | 4.2717 | 0.0401 | 4 | 193 | 48.903  | 0.619  | 0.0084   |            |
| lsm5+c | SNP57  | ASL32  | 0 | 1 | 2.1337 | 0.1457 | 4 | 193 | 49.4391 | 0.6148 | 0.0043   |            |
| lsm5+c | SNP58  | ASL33  | 0 | 1 | 0.3234 | 0.5702 | 4 | 205 | 65.7401 | 0.4965 | 7.94E-04 |            |
| lsm5+c | SNP59  | ASL34  | 0 | 1 | 1.031  | 0.3111 | 4 | 206 | 64.0883 | 0.5146 | 0.0024   |            |
| lsm5+c | SNP60  | ASL35  | 0 | 1 | 1.5856 | 0.2094 | 4 | 208 | 62.5556 | 0.5191 | 0.0037   |            |
| lsm5+c | SNP61  | ASL36  | 0 | 3 | 1.1129 | 0.3449 | 6 | 203 | 62.3067 | 0.5291 | 0.0077   |            |
| lsm5+c | SNP62  | ASL37  | 0 | 2 | 2.5156 | 0.0838 | 5 | 173 | 76.7626 | 0.4113 | 0.0171   |            |
| lsm5+c | SNP63  | ASL38  | 0 | 3 | 0.7241 | 0.5389 | 6 | 171 | 75.3709 | 0.4285 | 0.0073   |            |
| lsm5+c | SNP29  | ASL39  | 0 | 2 | 1.0902 | 0.3381 | 5 | 201 | 62.7861 | 0.5271 | 0.0051   |            |
| lsm5+c | SNP64  | ASL4   | 0 | 1 | 0.6975 | 0.4045 | 4 | 217 | 59.2981 | 0.5615 | 0.0014   |            |
| lsm5+c | SNP65  | ASL40  | 0 | 1 | 2.3775 | 0.1247 | 4 | 201 | 62.3927 | 0.5301 | 0.0056   | 0.2835 225 |
| lsm5+c | SNP66  | ASL41  | 0 | 1 | 2.2097 | 0.1387 | 4 | 200 | 63.413  | 0.5205 | 0.0053   |            |
| lsm5+c | SNP67  | ASL42  | 0 | 1 | 2.8593 | 0.0925 | 4 | 193 | 63.2461 | 0.5291 | 0.007    |            |
| lsm5+c | SNP68  | ASL43  | 0 | 1 | 2.42   | 0.1214 | 4 | 192 | 63.8457 | 0.5249 | 0.006    |            |
| lsm5+c | SNP69  | ASL44  | 0 | 1 | 2.42   | 0.1214 | 4 | 192 | 63.8473 | 0.5249 | 0.006    |            |
| lsm5+c | SNP70  | ASL45  | 0 | 1 | 2.1067 | 0.1483 | 4 | 190 | 64.4087 | 0.5217 | 0.0053   |            |
| lsm5+c | SNP71  | ASL46  | 0 | 1 | 1.0331 | 0.3108 | 4 | 181 | 68.2336 | 0.5005 | 0.0029   |            |
| lsm5+c | SNP72  | ASL47  | 0 | 1 | 1.0331 | 0.3108 | 4 | 181 | 68.2345 | 0.5005 | 0.0029   |            |
| lsm5+c | SNP73  | ASL48  | 0 | 1 | 0.7026 | 0.403  | 4 | 180 | 68.4618 | 0.4958 | 0.002    |            |
| lsm5+c | SNP30  | ASL49  | 0 | 1 | 0.7026 | 0.403  | 4 | 180 | 68.4631 | 0.4958 | 0.002    |            |
| lsm5+c | SNP74  | ASL5   | 0 | 1 | 1.3855 | 0.2404 | 4 | 218 | 59.9917 | 0.5544 | 0.0028   |            |
| lsm5+c | SNP75  | ASL50  | 0 | 1 | 0.7026 | 0.403  | 4 | 180 | 68.4643 | 0.4958 | 0.002    |            |
| lsm5+c | SNP76  | ASL51  | 0 | 2 | 1.0281 | 0.3598 | 5 | 178 | 70.9993 | 0.4823 | 0.006    |            |
| lsm5+c | SNP77  | ASL52  | 0 | 1 | 0.5583 | 0.456  | 4 | 160 | 65.7617 | 0.5277 | 0.0016   |            |
| lsm5+c | SNP31  | ASL53  | 0 | 1 | 1.6155 | 0.2056 | 4 | 154 | 71.198  | 0.4998 | 0.0052   |            |
| lsm5+c | SNP78  | ASL6   | 0 | 1 | 2.4458 | 0.1193 | 4 | 217 | 61.0985 | 0.5479 | 0.0051   |            |
| lsm5+c | SNP32  | ASL7   | 0 | 1 | 2.4458 | 0.1193 | 4 | 217 | 61.0994 | 0.5479 | 0.0051   |            |
| lsm5+c | SNP33  | ASL8   | 0 | 1 | 1.4606 | 0.2281 | 4 | 218 | 60.2124 | 0.5527 | 0.003    |            |
| lsm5+c | SNP34  | ASL9   | 0 | 1 | 2.4372 | 0.1199 | 4 | 218 | 60.7141 | 0.549  | 0.005    |            |
| lsm5+c | SNP1   | AUX01  | 0 | 1 | 0.9213 | 0.3385 | 4 | 169 | 55.7951 | 0.5489 | 0.0025   |            |
| lsm5+c | SNP2   | AUX02  | 0 | 1 | 0.159  | 0.6906 | 4 | 176 | 54.449  | 0.5604 | 3.97E-04 |            |
| lsm5+c | SNP3   | AUX03  | 0 | 1 | 0.0015 | 0.9693 | 4 | 178 | 54.875  | 0.5547 | 3.71E-06 | 0.5048 225 |
| lsm5+c | SNP4   | AUX04  | 0 | 1 | 0.2445 | 0.6216 | 4 | 179 | 55.6611 | 0.5479 | 6.18E-04 |            |
| lsm5+c | SNP5   | AUX05  | 0 | 2 | 0.6828 | 0.5065 | 5 | 180 | 55.6019 | 0.5597 | 0.0033   |            |
| lsm5+c | SNP6   | AUX06  | 0 | 2 | 1.2598 | 0.2862 | 5 | 180 | 56.2311 | 0.5547 | 0.0062   |            |
| lsm5+c | SNP7   | AUX07  | 0 | 1 | 0.4304 | 0.5126 | 4 | 179 | 58.1249 | 0.5375 | 0.0011   |            |
| lsm5+c | SNP8   | AUX08  | 0 | 2 | 0.0738 | 0.9289 | 5 | 171 | 57.9795 | 0.5498 | 3.89E-04 |            |
| lsm5+c | SNP9   | AUX09  | 0 | 1 | 0.1927 | 0.6612 | 4 | 172 | 58.8354 | 0.5336 | 5.23E-04 | 0.3104 225 |
| lsm5+c | SNP10  | AUX10  | 0 | 2 | 0.4034 | 0.6687 | 5 | 171 | 58.394  | 0.5398 | 0.0022   |            |
| lsm5+c | SNP11  | AUX11  | 0 | 2 | 0.0763 | 0.9266 | 5 | 171 | 59.0778 | 0.5344 | 4.15E-04 |            |
| lsm5+c | SNP12  | AUX12  | 0 | 1 | 0.1421 | 0.7066 | 4 | 172 | 58.6907 | 0.5347 | 3.84E-04 |            |
| lsm5+c | SNP13  | AUX13  | 0 | 2 | 0.0983 | 0.9065 | 5 | 170 | 58.2968 | 0.5409 | 5.31E-04 |            |
| lsm5+c | SNP14  | AUX14  | 0 | 2 | 0.7982 | 0.4518 | 5 | 170 | 59.539  | 0.5311 | 0.0044   |            |
| lsm5+c | SNP15  | AUX15  | 0 | 1 | 0.6507 | 0.421  | 4 | 168 | 60.6308 | 0.5226 | 0.0018   |            |



|        |        |       |   |   |          |        |   |     |         |        |          |            |
|--------|--------|-------|---|---|----------|--------|---|-----|---------|--------|----------|------------|
| lsm5+c | SNP16  | AUX16 | 0 | 2 | 0.1904   | 0.8268 | 5 | 164 | 58.5273 | 0.5328 | 0.0011   |            |
| lsm5+c | SNP17  | AUX17 | 0 | 1 | 0.0248   | 0.8751 | 4 | 165 | 58.9602 | 0.5264 | 7.11E-05 |            |
| lsm5+c | SNP18  | AUX18 | 0 | 1 | 5.88E-04 | 0.9807 | 4 | 164 | 58.2048 | 0.5318 | 1.68E-06 |            |
| lsm5+c | SNP19  | AUX19 | 0 | 1 | 1.3353   | 0.2496 | 4 | 161 | 58.2126 | 0.5274 | 0.0039   |            |
| lsm5+c | SNP20  | AUX20 | 0 | 1 | 0.0057   | 0.9398 | 4 | 156 | 58.589  | 0.5323 | 1.71E-05 |            |
| lsm5+c | SNP21  | AUX21 | 0 | 1 | 0.8478   | 0.3586 | 4 | 156 | 58.1966 | 0.5354 | 0.0025   |            |
| lsm5+c | SNP22  | AUX22 | 0 | 2 | 0.5465   | 0.5801 | 5 | 153 | 55.1902 | 0.5654 | 0.0031   |            |
| lsm5+c | SNP23  | AUX23 | 0 | 2 | 0.5198   | 0.5957 | 5 | 153 | 55.3104 | 0.5644 | 0.003    |            |
| lsm5+c | SNP222 | cp1   | 0 | 1 | 0.3632   | 0.5474 | 4 | 207 | 36.391  | 0.7216 | 4.88E-04 |            |
| lsm5+c | SNP231 | cp10  | 0 | 1 | 0.3712   | 0.543  | 4 | 218 | 45.277  | 0.6566 | 5.85E-04 |            |
| lsm5+c | SNP232 | cp11  | 0 | 1 | 0.2123   | 0.6454 | 4 | 218 | 45.2508 | 0.6568 | 3.34E-04 |            |
| lsm5+c | SNP233 | cp12  | 0 | 1 | 0.2717   | 0.6027 | 4 | 215 | 45.9775 | 0.6523 | 4.39E-04 |            |
| lsm5+c | SNP234 | cp13  | 0 | 1 | 0.0019   | 0.9657 | 4 | 194 | 32.9264 | 0.7381 | 2.51E-06 |            |
| lsm5+c | SNP235 | cp14  | 0 | 1 | 0.0445   | 0.8332 | 4 | 210 | 48.3134 | 0.6321 | 7.79E-05 |            |
| lsm5+c | SNP223 | cp2   | 0 | 1 | 0.0965   | 0.7564 | 4 | 216 | 43.7699 | 0.6675 | 1.49E-04 |            |
| lsm5+c | SNP224 | cp3   | 0 | 1 | 2.5421   | 0.1123 | 4 | 218 | 44.0767 | 0.6657 | 0.0039   |            |
| lsm5+c | SNP225 | cp4   | 0 | 1 | 0.3827   | 0.5368 | 4 | 218 | 45.1936 | 0.6572 | 6.02E-04 |            |
| lsm5+c | SNP226 | cp5   | 0 | 2 | 0.3636   | 0.6956 | 5 | 217 | 45.3305 | 0.6577 | 0.0011   |            |
| lsm5+c | SNP227 | cp6   | 0 | 1 | 0.0498   | 0.8236 | 4 | 218 | 45.3206 | 0.6562 | 7.86E-05 |            |
| lsm5+c | SNP228 | cp7   | 0 | 1 | 0.006    | 0.9384 | 4 | 218 | 45.4452 | 0.6553 | 9.47E-06 |            |
| lsm5+c | SNP229 | cp8   | 0 | 1 | 0.0531   | 0.818  | 4 | 217 | 45.4917 | 0.6553 | 8.43E-05 |            |
| lsm5+c | SNP230 | cp9   | 0 | 1 | 0.3712   | 0.543  | 4 | 218 | 45.2742 | 0.6566 | 5.85E-04 |            |
| lsm5+c | SNP236 | Fe1   | 0 | 1 | 0.3204   | 0.572  | 4 | 190 | 61.59   | 0.5466 | 7.65E-04 |            |
| lsm5+c | SNP245 | Fe10  | 0 | 1 | 0.0239   | 0.8773 | 4 | 165 | 58.0574 | 0.5658 | 6.29E-05 |            |
| lsm5+c | SNP246 | Fe11  | 0 | 1 | 0.0254   | 0.8736 | 4 | 165 | 58.0552 | 0.5658 | 6.68E-05 |            |
| lsm5+c | SNP237 | Fe2   | 0 | 1 | 0.0445   | 0.8331 | 4 | 203 | 61.7096 | 0.5442 | 9.99E-05 |            |
| lsm5+c | SNP238 | Fe3   | 0 | 1 | 0.2117   | 0.6459 | 4 | 203 | 62.1971 | 0.5406 | 4.79E-04 |            |
| lsm5+c | SNP239 | Fe4   | 0 | 1 | 0.2422   | 0.6232 | 4 | 204 | 61.8828 | 0.5407 | 5.45E-04 |            |
| lsm5+c | SNP240 | Fe5   | 0 | 1 | 0.2559   | 0.6135 | 4 | 201 | 61.5751 | 0.5382 | 5.88E-04 |            |
| lsm5+c | SNP241 | Fe6   | 0 | 1 | 0.372    | 0.5426 | 4 | 200 | 61.6055 | 0.5402 | 8.55E-04 |            |
| lsm5+c | SNP242 | Fe7   | 0 | 1 | 0.0463   | 0.8299 | 4 | 191 | 60.8398 | 0.5417 | 1.11E-04 |            |
| lsm5+c | SNP243 | Fe8   | 0 | 1 | 0.2937   | 0.5885 | 4 | 179 | 62.3583 | 0.5338 | 7.65E-04 |            |
| lsm5+c | SNP244 | Fe9   | 0 | 1 | 0.7362   | 0.392  | 4 | 177 | 61.7194 | 0.5421 | 0.0019   |            |
| lsm5+c | SNP247 | Fum1  | 0 | 1 | 1.1051   | 0.2943 | 4 | 218 | 59.0022 | 0.5644 | 0.0022   |            |
| lsm5+c | SNP248 | Fum2  | 0 | 2 | 2.0093   | 0.1364 | 5 | 232 | 58.0406 | 0.5675 | 0.0075   |            |
| lsm5+c | SNP249 | Fum3  | 0 | 1 | 2.8977   | 0.09   | 4 | 234 | 58.9327 | 0.5589 | 0.0055   |            |
| lsm5+c | SNP250 | Fum4  | 0 | 1 | 3.8834   | 0.0499 | 4 | 234 | 58.325  | 0.5635 | 0.0072   |            |
| lsm5+c | SNP251 | Fum5  | 0 | 1 | 3.2224   | 0.0739 | 4 | 232 | 56.1671 | 0.5781 | 0.0059   |            |
| lsm5+c | SNP252 | Fum6  | 0 | 1 | 3.002    | 0.0845 | 4 | 232 | 56.3516 | 0.5767 | 0.0055   |            |
| lsm5+c | SNP253 | Fum7  | 0 | 1 | 5.503    | 0.0198 | 4 | 232 | 55.9219 | 0.5799 | 0.01     |            |
| lsm5+c | SNP254 | Fum8  | 0 | 1 | 5.2631   | 0.0227 | 4 | 232 | 56.269  | 0.5773 | 0.0096   |            |
| lsm5+c | SNP255 | Ger1  | 0 | 1 | 2.7241   | 0.1009 | 4 | 152 | 72.0186 | 0.4657 | 0.0096   |            |
| lsm5+c | SNP264 | Ger10 | 0 | 1 | 1.1122   | 0.2932 | 4 | 155 | 71.0301 | 0.4655 | 0.0038   |            |
| lsm5+c | SNP265 | Ger11 | 0 | 1 | 1.1122   | 0.2932 | 4 | 155 | 71.0312 | 0.4654 | 0.0038   |            |
| lsm5+c | SNP266 | Ger12 | 0 | 1 | 1.1122   | 0.2932 | 4 | 155 | 71.0323 | 0.4654 | 0.0038   |            |
| lsm5+c | SNP267 | Ger13 | 0 | 1 | 1.1122   | 0.2932 | 4 | 155 | 71.0334 | 0.4654 | 0.0038   |            |
| lsm5+c | SNP268 | Ger14 | 0 | 1 | 1.0663   | 0.3034 | 4 | 156 | 70.3008 | 0.4706 | 0.0036   |            |
| lsm5+c | SNP269 | Ger15 | 0 | 1 | 1.0663   | 0.3034 | 4 | 156 | 70.2993 | 0.4706 | 0.0036   |            |
| lsm5+c | SNP270 | Ger16 | 0 | 1 | 0.0141   | 0.9056 | 4 | 156 | 69.673  | 0.4753 | 4.75E-05 |            |
| lsm5+c | SNP271 | Ger17 | 0 | 1 | 0.0013   | 0.9708 | 4 | 156 | 69.948  | 0.4732 | 4.54E-06 |            |
| lsm5+c | SNP272 | Ger18 | 0 | 1 | 1.0661   | 0.3034 | 4 | 156 | 70.2509 | 0.4709 | 0.0036   |            |
| lsm5+c | SNP273 | Ger19 | 0 | 1 | 1.0262   | 0.3126 | 4 | 155 | 70.6176 | 0.4685 | 0.0035   |            |
| lsm5+c | SNP256 | Ger2  | 0 | 1 | 0.735    | 0.3926 | 4 | 153 | 70.2866 | 0.4751 | 0.0025   |            |
| lsm5+c | SNP274 | Ger20 | 0 | 1 | 0.72     | 0.3975 | 4 | 155 | 67.1753 | 0.4944 | 0.0023   |            |
| lsm5+c | SNP275 | Ger21 | 0 | 1 | 1.0661   | 0.3034 | 4 | 156 | 70.2403 | 0.471  | 0.0036   |            |
| lsm5+c | SNP276 | Ger22 | 0 | 1 | 1.0661   | 0.3034 | 4 | 156 | 70.2415 | 0.471  | 0.0036   |            |
| lsm5+c | SNP277 | Ger23 | 0 | 1 | 1.0661   | 0.3034 | 4 | 156 | 70.2427 | 0.471  | 0.0036   |            |
| lsm5+c | SNP278 | Ger24 | 0 | 1 | 0.0141   | 0.9056 | 4 | 156 | 69.6721 | 0.4753 | 4.75E-05 |            |
| lsm5+c | SNP279 | Ger25 | 0 | 1 | 0.8024   | 0.3718 | 4 | 154 | 71.3456 | 0.4654 | 0.0028   |            |
| lsm5+c | SNP280 | Ger26 | 0 | 2 | 0.8731   | 0.4199 | 5 | 141 | 75.8688 | 0.4334 | 0.007    |            |
| lsm5+c | SNP257 | Ger3  | 0 | 1 | 1.1668   | 0.2818 | 4 | 153 | 74.0058 | 0.4473 | 0.0042   |            |
| lsm5+c | SNP258 | Ger4  | 0 | 1 | 0.016    | 0.8995 | 4 | 153 | 73.2275 | 0.4531 | 5.72E-05 |            |
| lsm5+c | SNP259 | Ger5  | 0 | 1 | 0.9534   | 0.3304 | 4 | 154 | 68.6952 | 0.4862 | 0.0032   |            |
| lsm5+c | SNP260 | Ger6  | 0 | 1 | 0.794    | 0.3743 | 4 | 154 | 69.0005 | 0.4839 | 0.0027   |            |
| lsm5+c | SNP261 | Ger7  | 0 | 1 | 1.1295   | 0.2896 | 4 | 154 | 72.5652 | 0.4572 | 0.004    |            |
| lsm5+c | SNP262 | Ger8  | 0 | 1 | 1.1295   | 0.2896 | 4 | 154 | 72.5662 | 0.4572 | 0.004    |            |
| lsm5+c | SNP263 | Ger9  | 0 | 1 | 0.7156   | 0.3989 | 4 | 155 | 67.674  | 0.4907 | 0.0024   |            |
| lsm5+c | SNP281 | ICD1  | 0 | 1 | 2.1739   | 0.1419 | 4 | 208 | 62.26   | 0.5396 | 0.0048   |            |
| lsm5+c | SNP290 | ICD10 | 0 | 1 | 0.6267   | 0.4294 | 4 | 231 | 56.9026 | 0.5761 | 0.0011   |            |
| lsm5+c | SNP291 | ICD11 | 0 | 1 | 0.4017   | 0.5268 | 4 | 231 | 56.9597 | 0.5757 | 7.38E-04 |            |
| lsm5+c | SNP292 | ICD12 | 0 | 1 | 3.60E-06 | 0.9985 | 4 | 229 | 57.497  | 0.5744 | 6.69E-09 |            |
| lsm5+c | SNP293 | ICD13 | 0 | 1 | 0.0181   | 0.8932 | 4 | 230 | 57.0999 | 0.5765 | 3.33E-05 |            |
| lsm5+c | SNP294 | ICD14 | 0 | 1 | 0.2905   | 0.5904 | 4 | 223 | 58.0568 | 0.577  | 5.51E-04 |            |
| lsm5+c | SNP282 | ICD2  | 0 | 2 | 0.4202   | 0.6575 | 5 | 215 | 63.391  | 0.5223 | 0.0019   |            |
| lsm5+c | SNP283 | ICD3  | 0 | 1 | 0.084    | 0.7722 | 4 | 216 | 63.4615 | 0.5196 | 1.87E-04 |            |
| lsm5+c | SNP284 | ICD4  | 0 | 1 | 4.8477   | 0.0287 | 4 | 216 | 60.8545 | 0.5394 | 0.0103   |            |
| lsm5+c | SNP285 | ICD5  | 0 | 1 | 0.3138   | 0.576  | 4 | 216 | 62.6887 | 0.5255 | 6.89E-04 |            |
| lsm5+c | SNP286 | ICD6  | 0 | 2 | 0.3875   | 0.6793 | 5 | 205 | 66.8589 | 0.4675 | 0.002    |            |
| lsm5+c | SNP287 | ICD7  | 0 | 1 | 4.8231   | 0.0292 | 4 | 206 | 64.848  | 0.481  | 0.0122   |            |
| lsm5+c | SNP288 | ICD8  | 0 | 1 | 0.6438   | 0.4232 | 4 | 231 | 56.8941 | 0.5762 | 0.0012   |            |
| lsm5+c | SNP289 | ICD9  | 0 | 1 | 0.6438   | 0.4232 | 4 | 231 | 56.8925 | 0.5762 | 0.0012   |            |
| lsm5+c | SNP295 | ISL1  | 0 | 1 | 5.8655   | 0.0164 | 4 | 194 | 58.1892 | 0.5623 | 0.0132   | 0.0591 225 |
| lsm5+c | SNP296 | ISL2  | 0 | 1 | 2.7262   | 0.1003 | 4 | 194 | 62.6514 | 0.5288 | 0.0066   |            |
| lsm5+c | SNP297 | ISL3  | 0 | 1 | 0.1231   | 0.7261 | 4 | 192 | 63.23   | 0.529  | 3.02E-04 |            |
| lsm5+c | SNP298 | ISL4  | 0 | 1 | 0.2596   | 0.611  | 4 | 190 | 63.4018 | 0.5325 | 6.39E-04 | 0.9833 225 |
| lsm5+c | SNP299 | ISL5  | 0 | 1 | 1.7409   | 0.1887 | 4 | 184 | 64.2948 | 0.533  | 0.0044   |            |
| lsm5+c | SNP300 | ISL6  | 0 | 1 | 4.2973   | 0.0396 | 4 | 183 | 68.4147 | 0.4969 | 0.0118   |            |
| lsm5+c | SNP301 | ME1   | 0 | 1 | 4.7312   | 0.0307 | 4 | 219 | 53.2757 | 0.5849 | 0.009    |            |
| lsm5+c | SNP310 | ME10  | 0 | 1 | 4.2121   | 0.0414 | 4 | 210 | 49.955  | 0.6073 | 0.0079   |            |
| lsm5+c | SNP311 | ME11  | 0 | 1 | 7.2687   | 0.0076 | 4 | 209 | 48.3986 | 0.6186 | 0.0133   | 0.2464 225 |
| lsm5+c | SNP312 | ME12  | 0 | 3 | 2.7403   | 0.0444 | 6 | 206 | 47.7298 | 0.6293 | 0.0148   |            |

|        |        |        |   |   |          |        |   |     |          |        |          |        |     |
|--------|--------|--------|---|---|----------|--------|---|-----|----------|--------|----------|--------|-----|
| lsm5+c | SNP302 | ME2    | 0 | 1 | 0.5603   | 0.4549 | 4 | 219 | 54.1271  | 0.5783 | 0.0011   |        |     |
| lsm5+c | SNP303 | ME3    | 0 | 1 | 0.1736   | 0.6773 | 4 | 219 | 54.991   | 0.5715 | 3.40E-04 |        |     |
| lsm5+c | SNP304 | ME4    | 0 | 1 | 7.6259   | 0.0062 | 4 | 219 | 52.1745  | 0.5935 | 0.0142   | 0.0015 | 225 |
| lsm5+c | SNP305 | ME5    | 0 | 1 | 1.7688   | 0.1849 | 4 | 219 | 52.5491  | 0.5906 | 0.0033   |        |     |
| lsm5+c | SNP306 | ME6    | 0 | 3 | 3.2355   | 0.0231 | 6 | 217 | 51.9839  | 0.5987 | 0.018    |        |     |
| lsm5+c | SNP307 | ME7    | 0 | 1 | 6.9211   | 0.0091 | 4 | 216 | 49.8868  | 0.6066 | 0.0126   | 0.1653 | 225 |
| lsm5+c | SNP308 | ME8    | 0 | 1 | 0.8588   | 0.3551 | 4 | 216 | 51.694   | 0.5923 | 0.0016   |        |     |
| lsm5+c | SNP309 | ME9    | 0 | 1 | 4.6948   | 0.0314 | 4 | 210 | 51.1172  | 0.5982 | 0.009    | 0.1416 | 244 |
| lsm5+c | SNP313 | P13K1  | 0 | 1 | 7.0734   | 0.0084 | 4 | 222 | 59.8212  | 0.5391 | 0.0147   | 0.0022 | 225 |
| lsm5+c | SNP322 | P13K10 | 0 | 1 | 0.3655   | 0.5462 | 4 | 184 | 45.1828  | 0.6479 | 7.00E-04 |        |     |
| lsm5+c | SNP314 | P13K2  | 0 | 1 | 0.5712   | 0.4506 | 4 | 222 | 57.6459  | 0.5559 | 0.0011   |        |     |
| lsm5+c | SNP315 | P13K3  | 0 | 1 | 0.8358   | 0.3616 | 4 | 222 | 57.6592  | 0.5558 | 0.0017   |        |     |
| lsm5+c | SNP316 | P13K4  | 0 | 1 | 0.1989   | 0.6561 | 4 | 222 | 57.4792  | 0.5572 | 3.97E-04 |        |     |
| lsm5+c | SNP317 | P13K5  | 0 | 1 | 0.39     | 0.5329 | 4 | 222 | 57.8661  | 0.5542 | 7.83E-04 |        |     |
| lsm5+c | SNP318 | P13K6  | 0 | 1 | 0.1935   | 0.6605 | 4 | 222 | 57.8458  | 0.5544 | 3.88E-04 |        |     |
| lsm5+c | SNP319 | P13K7  | 0 | 1 | 0.5558   | 0.4567 | 4 | 222 | 58.1873  | 0.5517 | 0.0011   |        |     |
| lsm5+c | SNP320 | P13K8  | 0 | 1 | 0.1851   | 0.6675 | 4 | 220 | 57.9563  | 0.555  | 3.74E-04 |        |     |
| lsm5+c | SNP321 | P13K9  | 0 | 1 | 0.1121   | 0.7381 | 4 | 220 | 57.554   | 0.5581 | 2.25E-04 |        |     |
| lsm5+c | SNP323 | PME1   | 0 | 1 | 0.0404   | 0.8409 | 4 | 235 | 56.4695  | 0.5789 | 7.24E-05 |        |     |
| lsm5+c | SNP324 | PME2   | 0 | 1 | 7.7381   | 0.0058 | 4 | 235 | 54.4372  | 0.5941 | 0.0134   | 0.0157 | 225 |
| lsm5+c | SNP325 | PME3   | 0 | 1 | 0.6768   | 0.4115 | 4 | 231 | 52.1621  | 0.6149 | 0.0011   |        |     |
| lsm5+c | SNP326 | SAH1   | 0 | 1 | 9.0768   | 0.003  | 4 | 175 | 52.911   | 0.6006 | 0.0207   | 0.0124 | 225 |
| lsm5+c | SNP327 | SAH2   | 0 | 1 | 7.8781   | 0.0056 | 4 | 175 | 54.1857  | 0.591  | 0.0184   | 0.0111 | 225 |
| lsm5+c | SNP328 | SAH3   | 0 | 1 | 2.9374   | 0.0883 | 4 | 175 | 51.3059  | 0.6127 | 0.0065   |        |     |
| lsm5+c | SNP329 | SAH4   | 0 | 1 | 2.6397   | 0.106  | 4 | 175 | 52.7977  | 0.6014 | 0.006    |        |     |
| lsm5+c | SNP330 | SAH5   | 0 | 2 | 3.4545   | 0.0338 | 5 | 170 | 51.2831  | 0.6134 | 0.0157   | 0.0433 | 224 |
| lsm5+c | SNP331 | SAH6   | 0 | 1 | 1.5508   | 0.2156 | 4 | 112 | 54.8598  | 0.5186 | 0.0067   |        |     |
| lsmc   | SNP79  | ABC1   | 0 | 1 | 4.3739   | 0.0378 | 3 | 200 | 78.7639  | 0.4064 | 0.013    |        |     |
| lsmc   | SNP88  | ABC10  | 0 | 1 | 3.3472   | 0.0687 | 3 | 218 | 75.1785  | 0.4455 | 0.0085   |        |     |
| lsmc   | SNP89  | ABC11  | 0 | 1 | 3.3472   | 0.0687 | 3 | 218 | 75.1804  | 0.4455 | 0.0085   |        |     |
| lsmc   | SNP90  | ABC12  | 0 | 1 | 4.4645   | 0.0357 | 3 | 218 | 75.8552  | 0.4405 | 0.0115   |        |     |
| lsmc   | SNP91  | ABC13  | 0 | 1 | 3.2608   | 0.0723 | 3 | 216 | 76.6279  | 0.4376 | 0.0085   |        |     |
| lsmc   | SNP92  | ABC14  | 0 | 1 | 5.82E-04 | 0.9808 | 3 | 218 | 76.5793  | 0.4352 | 1.51E-06 |        |     |
| lsmc   | SNP93  | ABC15  | 0 | 1 | 1.0419   | 0.3085 | 3 | 213 | 73.7953  | 0.4643 | 0.0026   |        |     |
| lsmc   | SNP94  | ABC16  | 0 | 1 | 0.0506   | 0.8223 | 3 | 209 | 69.4532  | 0.4966 | 1.22E-04 |        |     |
| lsmc   | SNP95  | ABC17  | 0 | 1 | 3.958    | 0.048  | 3 | 209 | 69.7208  | 0.4947 | 0.0096   |        |     |
| lsmc   | SNP96  | ABC18  | 0 | 1 | 3.958    | 0.048  | 3 | 209 | 69.7222  | 0.4947 | 0.0096   |        |     |
| lsmc   | SNP97  | ABC19  | 0 | 2 | 0.2353   | 0.7905 | 4 | 208 | 70.3732  | 0.4924 | 0.0011   |        |     |
| lsmc   | SNP80  | ABC2   | 0 | 1 | 4.3739   | 0.0378 | 3 | 200 | 78.7662  | 0.4064 | 0.013    |        |     |
| lsmc   | SNP98  | ABC20  | 0 | 1 | 0.1104   | 0.74   | 3 | 209 | 69.3098  | 0.4976 | 2.65E-04 |        |     |
| lsmc   | SNP99  | ABC21  | 0 | 1 | 3.1467   | 0.0776 | 3 | 206 | 60.5402  | 0.5526 | 0.0068   |        |     |
| lsmc   | SNP81  | ABC3   | 0 | 1 | 4.206    | 0.0416 | 3 | 204 | 71.6326  | 0.4721 | 0.0109   |        |     |
| lsmc   | SNP82  | ABC4   | 0 | 3 | 1.703    | 0.1675 | 5 | 211 | 75.6073  | 0.4455 | 0.0134   |        |     |
| lsmc   | SNP83  | ABC5   | 0 | 1 | 4.7334   | 0.0307 | 3 | 218 | 75.0057  | 0.4468 | 0.012    |        |     |
| lsmc   | SNP84  | ABC6   | 0 | 1 | 3.1755   | 0.0761 | 3 | 218 | 71.8403  | 0.4701 | 0.0077   |        |     |
| lsmc   | SNP85  | ABC7   | 0 | 1 | 3.3472   | 0.0687 | 3 | 218 | 75.1723  | 0.4456 | 0.0085   |        |     |
| lsmc   | SNP86  | ABC8   | 0 | 1 | 3.3472   | 0.0687 | 3 | 218 | 75.1745  | 0.4456 | 0.0085   |        |     |
| lsmc   | SNP87  | ABC9   | 0 | 1 | 3.3472   | 0.0687 | 3 | 218 | 75.1765  | 0.4455 | 0.0085   |        |     |
| lsmc   | SNP101 | AL1_1  | 0 | 1 | 0.1396   | 0.7093 | 3 | 133 | 141.3566 | 0.0714 | 9.75E-04 |        |     |
| lsmc   | SNP110 | AL1_10 | 0 | 2 | 0.128    | 0.88   | 4 | 121 | 73.4161  | 0.548  | 9.56E-04 |        |     |
| lsmc   | SNP111 | AL1_11 | 0 | 1 | 1.1363   | 0.2885 | 3 | 122 | 71.123   | 0.5585 | 0.0041   |        |     |
| lsmc   | SNP112 | AL1_12 | 0 | 1 | 0.1324   | 0.7165 | 3 | 152 | 78.2595  | 0.4746 | 4.58E-04 |        |     |
| lsmc   | SNP113 | AL1_13 | 0 | 1 | 0.2823   | 0.596  | 3 | 152 | 76.6745  | 0.4852 | 9.56E-04 |        |     |
| lsmc   | SNP114 | AL1_14 | 0 | 1 | 0.2823   | 0.596  | 3 | 152 | 76.6707  | 0.4852 | 9.56E-04 |        |     |
| lsmc   | SNP115 | AL1_15 | 0 | 1 | 0.3317   | 0.5655 | 3 | 152 | 79.0484  | 0.4693 | 0.0012   |        |     |
| lsmc   | SNP116 | AL1_16 | 0 | 1 | 0.2825   | 0.5959 | 3 | 152 | 76.6461  | 0.4854 | 9.56E-04 |        |     |
| lsmc   | SNP117 | AL1_17 | 0 | 1 | 0.2825   | 0.5958 | 3 | 152 | 76.644   | 0.4854 | 9.56E-04 |        |     |
| lsmc   | SNP118 | AL1_18 | 0 | 1 | 0.2825   | 0.5958 | 3 | 152 | 76.6421  | 0.4854 | 9.56E-04 |        |     |
| lsmc   | SNP119 | AL1_19 | 0 | 1 | 0.2543   | 0.6148 | 3 | 151 | 76.3689  | 0.4906 | 8.58E-04 |        |     |
| lsmc   | SNP102 | AL1_2  | 0 | 1 | 1.2455   | 0.2664 | 3 | 134 | 64.6756  | 0.575  | 0.004    |        |     |
| lsmc   | SNP120 | AL1_20 | 0 | 1 | 0.3619   | 0.5484 | 3 | 150 | 81.5551  | 0.4526 | 0.0013   |        |     |
| lsmc   | SNP121 | AL1_21 | 0 | 1 | 0.3619   | 0.5484 | 3 | 150 | 81.5564  | 0.4526 | 0.0013   |        |     |
| lsmc   | SNP122 | AL1_22 | 0 | 1 | 0.3619   | 0.5483 | 3 | 150 | 81.5576  | 0.4526 | 0.0013   |        |     |
| lsmc   | SNP123 | AL1_23 | 0 | 1 | 0.7921   | 0.3749 | 3 | 149 | 75.5087  | 0.4715 | 0.0028   |        |     |
| lsmc   | SNP124 | AL1_24 | 0 | 1 | 0.7921   | 0.3749 | 3 | 149 | 75.5063  | 0.4715 | 0.0028   |        |     |
| lsmc   | SNP125 | AL1_25 | 0 | 1 | 0.0283   | 0.8667 | 3 | 149 | 74.3475  | 0.4796 | 9.87E-05 |        |     |
| lsmc   | SNP126 | AL1_26 | 0 | 1 | 0.0283   | 0.8667 | 3 | 149 | 74.3442  | 0.4797 | 9.87E-05 |        |     |
| lsmc   | SNP127 | AL1_27 | 0 | 1 | 1.2034   | 0.2744 | 3 | 147 | 72.3746  | 0.4827 | 0.0042   |        |     |
| lsmc   | SNP128 | AL1_28 | 0 | 1 | 0.0995   | 0.7529 | 3 | 146 | 72.1059  | 0.4881 | 3.49E-04 |        |     |
| lsmc   | SNP129 | AL1_29 | 0 | 1 | 0.6357   | 0.4266 | 3 | 146 | 73.0662  | 0.4813 | 0.0023   |        |     |
| lsmc   | SNP103 | AL1_3  | 0 | 1 | 0.188    | 0.6652 | 3 | 137 | 71.95    | 0.5176 | 6.62E-04 |        |     |
| lsmc   | SNP130 | AL1_30 | 0 | 1 | 1.2355   | 0.2682 | 3 | 146 | 72.8572  | 0.4828 | 0.0044   |        |     |
| lsmc   | SNP131 | AL1_31 | 0 | 1 | 0.6381   | 0.4257 | 3 | 145 | 73.9554  | 0.4766 | 0.0023   |        |     |
| lsmc   | SNP104 | AL1_4  | 0 | 1 | 0.0122   | 0.9122 | 3 | 143 | 76.3067  | 0.4999 | 4.27E-05 |        |     |
| lsmc   | SNP105 | AL1_5  | 0 | 1 | 0.0508   | 0.822  | 3 | 151 | 79.1243  | 0.4706 | 1.78E-04 |        |     |
| lsmc   | SNP106 | AL1_6  | 0 | 2 | 0.2799   | 0.7563 | 4 | 149 | 79.5664  | 0.4723 | 0.002    |        |     |
| lsmc   | SNP107 | AL1_7  | 0 | 2 | 1.0469   | 0.3542 | 4 | 121 | 68.2027  | 0.5801 | 0.0073   |        |     |
| lsmc   | SNP108 | AL1_8  | 0 | 1 | 0.223    | 0.6376 | 3 | 122 | 73.5589  | 0.5434 | 8.35E-04 |        |     |
| lsmc   | SNP109 | AL1_9  | 0 | 1 | 0.2377   | 0.6268 | 3 | 122 | 69.2447  | 0.5701 | 8.37E-04 |        |     |
| lsmc   | SNP100 | AL16_1 | 0 | 1 | 2.6935   | 0.1038 | 3 | 105 | 96.8387  | 0.216  | 0.0201   |        |     |
| lsmc   | SNP132 | AL2_1  | 0 | 1 | 0.0542   | 0.8163 | 3 | 137 | 106.3141 | 0.3612 | 2.53E-04 |        |     |
| lsmc   | SNP141 | AL2_10 | 0 | 1 | 0.3759   | 0.5407 | 3 | 155 | 112.1032 | 0.2865 | 0.0017   |        |     |
| lsmc   | SNP142 | AL2_11 | 0 | 1 | 0.8263   | 0.3647 | 3 | 163 | 106.9061 | 0.3022 | 0.0035   |        |     |
| lsmc   | SNP143 | AL2_12 | 0 | 2 | 4.6552   | 0.0108 | 4 | 161 | 111.5434 | 0.2803 | 0.0416   |        |     |
| lsmc   | SNP144 | AL2_13 | 0 | 1 | 1.2873   | 0.2582 | 3 | 162 | 112.2782 | 0.2711 | 0.0058   |        |     |
| lsmc   | SNP145 | AL2_14 | 0 | 1 | 0.9959   | 0.3198 | 3 | 162 | 109.2508 | 0.2907 | 0.0044   |        |     |
| lsmc   | SNP146 | AL2_15 | 0 | 1 | 1.0045   | 0.3177 | 3 | 161 | 112.0209 | 0.2646 | 0.0046   |        |     |
| lsmc   | SNP147 | AL2_16 | 0 | 1 | 1.065    | 0.3036 | 3 | 161 | 113.1929 | 0.2569 | 0.0049   |        |     |
| lsmc   | SNP148 | AL2_17 | 0 | 1 | 0.1995   | 0.6557 | 3 | 156 | 108.2892 | 0.2927 | 9.05E-04 |        |     |
| lsmc   | SNP133 | AL2_2  | 0 | 1 | 6.3497   | 0.0128 | 3 | 149 | 96.5597  | 0.4012 | 0.0255   |        |     |



|      |        |        |   |   |        |        |   |     |          |        |          |
|------|--------|--------|---|---|--------|--------|---|-----|----------|--------|----------|
| lsmc | SNP134 | AL2_3  | 0 | 1 | 1.9394 | 0.1658 | 3 | 150 | 112.8862 | 0.3007 | 0.009    |
| lsmc | SNP135 | AL2_4  | 0 | 1 | 0.0139 | 0.9062 | 3 | 152 | 105.1761 | 0.3401 | 6.04E-05 |
| lsmc | SNP136 | AL2_5  | 0 | 1 | 1.0393 | 0.3096 | 3 | 152 | 109.5635 | 0.3126 | 0.0047   |
| lsmc | SNP137 | AL2_6  | 0 | 1 | 0.8869 | 0.3478 | 3 | 152 | 106.4424 | 0.3322 | 0.0039   |
| lsmc | SNP138 | AL2_7  | 0 | 1 | 1.8051 | 0.1811 | 3 | 152 | 106.3898 | 0.3325 | 0.0079   |
| lsmc | SNP139 | AL2_8  | 0 | 1 | 1.0401 | 0.3094 | 3 | 152 | 109.6203 | 0.3122 | 0.0047   |
| lsmc | SNP140 | AL2_9  | 0 | 2 | 2.0238 | 0.1357 | 4 | 150 | 119.4177 | 0.26   | 0.02     |
| lsmc | SNP149 | AL3_1  | 0 | 1 | 0.5188 | 0.4725 | 3 | 147 | 1.5673   | 0.9876 | 4.39E-05 |
| lsmc | SNP150 | AL3_2  | 0 | 1 | 0.6798 | 0.411  | 3 | 147 | 63.8051  | 0.4937 | 0.0023   |
| lsmc | SNP151 | AL3_3  | 0 | 1 | 0.3187 | 0.5733 | 3 | 146 | 65.4808  | 0.4815 | 0.0011   |
| lsmc | SNP152 | AL3_4  | 0 | 1 | 0.36   | 0.5494 | 3 | 147 | 63.0422  | 0.4998 | 0.0012   |
| lsmc | SNP153 | AL3_5  | 0 | 2 | 0.0935 | 0.9108 | 4 | 146 | 64.4277  | 0.4943 | 6.48E-04 |
| lsmc | SNP154 | AL3_6  | 0 | 1 | 0.8056 | 0.3708 | 3 | 163 | 54.5768  | 0.5793 | 0.0021   |
| lsmc | SNP155 | AL3_7  | 0 | 1 | 0.0067 | 0.9348 | 3 | 162 | 53.5311  | 0.5898 | 1.70E-05 |
| lsmc | SNP156 | AL3_8  | 0 | 1 | 1.3645 | 0.2445 | 3 | 163 | 54.063   | 0.5832 | 0.0035   |
| lsmc | SNP157 | AL3_9  | 0 | 2 | 0.8834 | 0.4154 | 4 | 162 | 52.1784  | 0.6002 | 0.0044   |
| lsmc | SNP158 | AL5_1  | 0 | 1 | 0.1003 | 0.7519 | 3 | 140 | 76.8799  | 0.4697 | 3.80E-04 |
| lsmc | SNP167 | AL5_10 | 0 | 1 | 1.8429 | 0.1764 | 3 | 175 | 78.4893  | 0.4569 | 0.0057   |
| lsmc | SNP168 | AL5_11 | 0 | 1 | 0.6292 | 0.4287 | 3 | 179 | 84.8334  | 0.411  | 0.0021   |
| lsmc | SNP169 | AL5_12 | 0 | 1 | 0.6293 | 0.4287 | 3 | 179 | 84.8364  | 0.411  | 0.0021   |
| lsmc | SNP170 | AL5_13 | 0 | 3 | 1.1359 | 0.336  | 5 | 176 | 85.2529  | 0.4093 | 0.0114   |
| lsmc | SNP171 | AL5_14 | 0 | 1 | 3.0255 | 0.0837 | 3 | 179 | 83.5352  | 0.42   | 0.0098   |
| lsmc | SNP172 | AL5_15 | 0 | 3 | 3.0833 | 0.0287 | 5 | 183 | 79.4401  | 0.4473 | 0.0279   |
| lsmc | SNP173 | AL5_16 | 0 | 1 | 3.8315 | 0.0518 | 3 | 186 | 76.0572  | 0.4622 | 0.0111   |
| lsmc | SNP174 | AL5_17 | 0 | 1 | 1.3607 | 0.2449 | 3 | 186 | 76.7615  | 0.4572 | 0.004    |
| lsmc | SNP175 | AL5_18 | 0 | 1 | 2.3341 | 0.1283 | 3 | 186 | 72.8266  | 0.485  | 0.0065   |
| lsmc | SNP176 | AL5_19 | 0 | 2 | 2.0951 | 0.126  | 4 | 185 | 73.7778  | 0.4811 | 0.0118   |
| lsmc | SNP159 | AL5_2  | 0 | 1 | 0.2958 | 0.5874 | 3 | 143 | 83.7757  | 0.4364 | 0.0012   |
| lsmc | SNP177 | AL5_20 | 0 | 1 | 0.6075 | 0.4367 | 3 | 186 | 83.2681  | 0.4112 | 0.0019   |
| lsmc | SNP178 | AL5_21 | 0 | 1 | 3.8314 | 0.0518 | 3 | 186 | 76.0704  | 0.4621 | 0.0111   |
| lsmc | SNP179 | AL5_22 | 0 | 1 | 0.554  | 0.4576 | 3 | 186 | 83.597   | 0.4089 | 0.0018   |
| lsmc | SNP180 | AL5_23 | 0 | 1 | 0.5904 | 0.4432 | 3 | 185 | 83.8095  | 0.4082 | 0.0019   |
| lsmc | SNP181 | AL5_24 | 0 | 1 | 1.2778 | 0.2601 | 3 | 150 | 105.0083 | 0.235  | 0.0065   |
| lsmc | SNP160 | AL5_3  | 0 | 1 | 1.3284 | 0.2508 | 3 | 162 | 87.0159  | 0.3969 | 0.0049   |
| lsmc | SNP161 | AL5_4  | 0 | 1 | 2.0217 | 0.1569 | 3 | 172 | 77.2375  | 0.4501 | 0.0065   |
| lsmc | SNP162 | AL5_5  | 0 | 1 | 0.0103 | 0.9193 | 3 | 172 | 81.2524  | 0.4215 | 3.46E-05 |
| lsmc | SNP163 | AL5_6  | 0 | 1 | 0.1899 | 0.6635 | 3 | 172 | 81.0363  | 0.4463 | 6.11E-04 |
| lsmc | SNP164 | AL5_7  | 0 | 1 | 0.6785 | 0.4112 | 3 | 172 | 81.3054  | 0.4445 | 0.0022   |
| lsmc | SNP165 | AL5_8  | 0 | 1 | 0.5639 | 0.4537 | 3 | 175 | 82.25    | 0.4309 | 0.0018   |
| lsmc | SNP166 | AL5_9  | 0 | 1 | 2.2793 | 0.1329 | 3 | 175 | 79.9246  | 0.447  | 0.0072   |
| lsmc | SNP182 | AL8_1  | 0 | 1 | 2.0149 | 0.1577 | 3 | 160 | 73.9937  | 0.466  | 0.0067   |
| lsmc | SNP191 | AL8_10 | 0 | 1 | 0.1312 | 0.7177 | 3 | 173 | 83.8485  | 0.4288 | 4.33E-04 |
| lsmc | SNP192 | AL8_11 | 0 | 1 | 1.6412 | 0.2019 | 3 | 169 | 74.2602  | 0.4962 | 0.0049   |
| lsmc | SNP193 | AL8_12 | 0 | 1 | 0.74   | 0.3909 | 3 | 174 | 79.9707  | 0.4527 | 0.0023   |
| lsmc | SNP194 | AL8_13 | 0 | 1 | 0.7399 | 0.3909 | 3 | 174 | 79.9723  | 0.4527 | 0.0023   |
| lsmc | SNP195 | AL8_14 | 0 | 1 | 1.7529 | 0.1873 | 3 | 173 | 80.734   | 0.4402 | 0.0057   |
| lsmc | SNP196 | AL8_15 | 0 | 2 | 0.4207 | 0.6572 | 4 | 174 | 84.5475  | 0.4214 | 0.0028   |
| lsmc | SNP197 | AL8_16 | 0 | 1 | 0.2121 | 0.6457 | 3 | 175 | 84.261   | 0.4201 | 7.03E-04 |
| lsmc | SNP198 | AL8_17 | 0 | 1 | 0.6997 | 0.404  | 3 | 175 | 80.8382  | 0.4436 | 0.0022   |
| lsmc | SNP199 | AL8_18 | 0 | 2 | 1.6726 | 0.1908 | 4 | 174 | 76.4095  | 0.4771 | 0.0101   |
| lsmc | SNP200 | AL8_19 | 0 | 1 | 0.7005 | 0.4038 | 3 | 175 | 80.7466  | 0.4443 | 0.0022   |
| lsmc | SNP183 | AL8_2  | 0 | 1 | 0.0856 | 0.7702 | 3 | 142 | 77.5645  | 0.4262 | 3.46E-04 |
| lsmc | SNP201 | AL8_20 | 0 | 1 | 0.7005 | 0.4038 | 3 | 175 | 80.7489  | 0.4443 | 0.0022   |
| lsmc | SNP202 | AL8_21 | 0 | 1 | 0.7896 | 0.3755 | 3 | 174 | 77.6191  | 0.4664 | 0.0024   |
| lsmc | SNP203 | AL8_22 | 0 | 1 | 0.7004 | 0.4038 | 3 | 175 | 80.7609  | 0.4442 | 0.0022   |
| lsmc | SNP204 | AL8_23 | 0 | 1 | 0.2365 | 0.6273 | 3 | 174 | 84.8922  | 0.4182 | 7.91E-04 |
| lsmc | SNP205 | AL8_24 | 0 | 1 | 0.7823 | 0.3777 | 3 | 172 | 80.1475  | 0.4521 | 0.0025   |
| lsmc | SNP206 | AL8_25 | 0 | 1 | 0.3746 | 0.5413 | 3 | 168 | 79.6791  | 0.4623 | 0.0012   |
| lsmc | SNP207 | AL8_26 | 0 | 1 | 0.2185 | 0.6409 | 3 | 139 | 90.3877  | 0.4489 | 8.66E-04 |
| lsmc | SNP184 | AL8_3  | 0 | 1 | 1.0211 | 0.3137 | 3 | 164 | 72.4593  | 0.4717 | 0.0033   |
| lsmc | SNP185 | AL8_4  | 0 | 1 | 1.0211 | 0.3137 | 3 | 164 | 72.4571  | 0.4717 | 0.0033   |
| lsmc | SNP186 | AL8_5  | 0 | 1 | 1.0167 | 0.3148 | 3 | 163 | 72.7931  | 0.4723 | 0.0033   |
| lsmc | SNP187 | AL8_6  | 0 | 1 | 1.0221 | 0.3135 | 3 | 164 | 72.3814  | 0.4723 | 0.0033   |
| lsmc | SNP188 | AL8_7  | 0 | 1 | 0.7942 | 0.3741 | 3 | 171 | 75.1499  | 0.469  | 0.0025   |
| lsmc | SNP189 | AL8_8  | 0 | 1 | 0.7943 | 0.3741 | 3 | 171 | 75.1481  | 0.469  | 0.0025   |
| lsmc | SNP190 | AL8_9  | 0 | 1 | 0.7215 | 0.3968 | 3 | 173 | 80.5131  | 0.4515 | 0.0023   |
| lsmc | SNP24  | AI9_1  | 0 | 1 | 1.4046 | 0.2372 | 3 | 226 | 87.5361  | 0.3659 | 0.0039   |
| lsmc | SNP25  | AI9_2  | 0 | 1 | 1.4009 | 0.2378 | 3 | 227 | 87.0279  | 0.3671 | 0.0039   |
| lsmc | SNP208 | anti1  | 0 | 1 | 4.4956 | 0.0352 | 3 | 206 | 76.944   | 0.4159 | 0.0127   |
| lsmc | SNP217 | anti10 | 0 | 2 | 0.8093 | 0.4468 | 4 | 178 | 94.6857  | 0.2474 | 0.0068   |
| lsmc | SNP218 | anti11 | 0 | 1 | 1.0174 | 0.3145 | 3 | 179 | 95.5229  | 0.2365 | 0.0043   |
| lsmc | SNP219 | anti12 | 0 | 1 | 1.0174 | 0.3145 | 3 | 179 | 95.5234  | 0.2365 | 0.0043   |
| lsmc | SNP220 | anti13 | 0 | 1 | 1.516  | 0.2198 | 3 | 179 | 93.329   | 0.254  | 0.0063   |
| lsmc | SNP221 | anti14 | 0 | 1 | 0.3811 | 0.5378 | 3 | 171 | 95.8999  | 0.2393 | 0.0017   |
| lsmc | SNP209 | anti2  | 0 | 1 | 0.2068 | 0.6497 | 3 | 209 | 88.4229  | 0.3242 | 6.69E-04 |
| lsmc | SNP210 | anti3  | 0 | 1 | 0.106  | 0.7451 | 3 | 209 | 88.0113  | 0.3273 | 3.41E-04 |
| lsmc | SNP211 | anti4  | 0 | 1 | 0.8918 | 0.3461 | 3 | 203 | 92.351   | 0.2997 | 0.0031   |
| lsmc | SNP212 | anti5  | 0 | 1 | 0.535  | 0.4654 | 3 | 197 | 84.7488  | 0.3595 | 0.0017   |
| lsmc | SNP213 | anti6  | 0 | 1 | 0.1869 | 0.666  | 3 | 197 | 84.7882  | 0.3592 | 6.08E-04 |
| lsmc | SNP214 | anti7  | 0 | 2 | 1.3931 | 0.2509 | 4 | 185 | 91.0139  | 0.2693 | 0.011    |
| lsmc | SNP215 | anti8  | 0 | 1 | 0.8183 | 0.3669 | 3 | 186 | 91.0149  | 0.2653 | 0.0032   |
| lsmc | SNP216 | anti9  | 0 | 1 | 2.167  | 0.1428 | 3 | 177 | 92.3182  | 0.2733 | 0.0089   |
| lsmc | SNP26  | ASL1   | 0 | 1 | 0.0043 | 0.9477 | 3 | 195 | 77.842   | 0.4339 | 1.25E-05 |
| lsmc | SNP35  | ASL10  | 0 | 1 | 0.5793 | 0.4474 | 3 | 218 | 84.9374  | 0.3695 | 0.0017   |
| lsmc | SNP36  | ASL11  | 0 | 1 | 2.1825 | 0.141  | 3 | 223 | 83.2293  | 0.3788 | 0.0061   |
| lsmc | SNP37  | ASL12  | 0 | 2 | 1.1585 | 0.3159 | 4 | 222 | 83.2076  | 0.3818 | 0.0065   |
| lsmc | SNP38  | ASL13  | 0 | 1 | 0.449  | 0.5035 | 3 | 223 | 83.9649  | 0.3733 | 0.0013   |
| lsmc | SNP39  | ASL14  | 0 | 1 | 1.4849 | 0.2243 | 3 | 223 | 83.4346  | 0.3773 | 0.0041   |
| lsmc | SNP40  | ASL15  | 0 | 2 | 0.7155 | 0.4901 | 4 | 222 | 85.6746  | 0.3634 | 0.0041   |
| lsmc | SNP41  | ASL16  | 0 | 1 | 0.3924 | 0.5318 | 3 | 203 | 85.1246  | 0.382  | 0.0012   |
| lsmc | SNP42  | ASL17  | 0 | 1 | 2.1826 | 0.141  | 3 | 223 | 83.1687  | 0.3793 | 0.0061   |

|      |        |       |   |   |         |          |   |     |          |        |          |        |     |
|------|--------|-------|---|---|---------|----------|---|-----|----------|--------|----------|--------|-----|
| lsmc | SNP43  | ASL18 | 0 | 1 | 2.1826  | 0.141    | 3 | 223 | 83.1703  | 0.3793 | 0.0061   |        |     |
| lsmc | SNP44  | ASL19 | 0 | 1 | 2.1826  | 0.141    | 3 | 223 | 83.1719  | 0.3793 | 0.0061   |        |     |
| lsmc | SNP27  | ASL2  | 0 | 1 | 1.9873  | 0.1602   | 3 | 197 | 73.6119  | 0.4619 | 0.0054   | 0.6997 | 244 |
| lsmc | SNP45  | ASL20 | 0 | 1 | 2.0327  | 0.1553   | 3 | 223 | 83.2284  | 0.3788 | 0.0057   |        |     |
| lsmc | SNP46  | ASL21 | 0 | 1 | 2.9167  | 0.0891   | 3 | 223 | 83.5     | 0.3768 | 0.0082   |        |     |
| lsmc | SNP47  | ASL22 | 0 | 1 | 2.9167  | 0.0891   | 3 | 223 | 83.5021  | 0.3768 | 0.0082   |        |     |
| lsmc | SNP48  | ASL23 | 0 | 1 | 2.9167  | 0.0891   | 3 | 223 | 83.504   | 0.3768 | 0.0082   |        |     |
| lsmc | SNP49  | ASL24 | 0 | 1 | 3.3452  | 0.0687   | 3 | 222 | 82.8761  | 0.3815 | 0.0093   |        |     |
| lsmc | SNP50  | ASL25 | 0 | 1 | 0.2831  | 0.5952   | 3 | 222 | 86.7833  | 0.3523 | 8.26E-04 |        |     |
| lsmc | SNP51  | ASL26 | 0 | 1 | 1.2875  | 0.2579   | 3 | 200 | 91.1591  | 0.3483 | 0.0042   |        |     |
| lsmc | SNP52  | ASL27 | 0 | 1 | 0.9252  | 0.3373   | 3 | 202 | 90.6157  | 0.3492 | 0.003    |        |     |
| lsmc | SNP53  | ASL28 | 0 | 1 | 0.9252  | 0.3373   | 3 | 202 | 90.6148  | 0.3492 | 0.003    |        |     |
| lsmc | SNP54  | ASL29 | 0 | 1 | 0.6547  | 0.4194   | 3 | 206 | 91.6325  | 0.3286 | 0.0021   |        |     |
| lsmc | SNP28  | ASL3  | 0 | 1 | 3.1587  | 0.077    | 3 | 210 | 73.0561  | 0.4547 | 0.0082   |        |     |
| lsmc | SNP55  | ASL30 | 0 | 2 | 0.0437  | 0.9573   | 4 | 203 | 91.5898  | 0.3354 | 2.86E-04 |        |     |
| lsmc | SNP56  | ASL31 | 0 | 1 | 1.0879  | 0.2982   | 3 | 194 | 91.5703  | 0.3363 | 0.0037   |        |     |
| lsmc | SNP57  | ASL32 | 0 | 1 | 2.9151  | 0.0894   | 3 | 194 | 91.3322  | 0.3381 | 0.0099   |        |     |
| lsmc | SNP58  | ASL33 |   |   |         |          |   |     |          |        |          |        |     |
| lsmc | SNP59  | ASL34 | 0 | 1 | 0.6141  | 0.4342   | 3 | 207 | 90.967   | 0.3606 | 0.0019   |        |     |
| lsmc | SNP60  | ASL35 | 0 | 1 | 0.222   | 0.638    | 3 | 209 | 93.7017  | 0.3483 | 6.92E-04 |        |     |
| lsmc | SNP61  | ASL36 | 0 | 3 | 0.7782  | 0.5074   | 5 | 204 | 95.6875  | 0.3436 | 0.0075   |        |     |
| lsmc | SNP62  | ASL37 | 0 | 2 | 0.2989  | 0.742    | 4 | 174 | 97.7     | 0.3481 | 0.0022   |        |     |
| lsmc | SNP63  | ASL38 | 0 | 3 | 0.9587  | 0.4136   | 5 | 172 | 97.3393  | 0.3579 | 0.0107   |        |     |
| lsmc | SNP64  | ASL39 | 0 | 2 | 0.1109  | 0.895    | 4 | 202 | 101.5873 | 0.3096 | 7.58E-04 |        |     |
| lsmc | SNP29  | ASL4  | 0 | 1 | 0.4279  | 0.5137   | 3 | 218 | 86.1363  | 0.3613 | 0.0013   |        |     |
| lsmc | SNP65  | ASL40 | 0 | 1 | 4.7084  | 0.0312   | 3 | 202 | 100.4909 | 0.311  | 0.0161   |        |     |
| lsmc | SNP66  | ASL41 | 0 | 1 | 0.2213  | 0.6386   | 3 | 201 | 103.9488 | 0.2811 | 7.91E-04 |        |     |
| lsmc | SNP67  | ASL42 | 0 | 1 | 0.9175  | 0.3393   | 3 | 194 | 105.0042 | 0.2714 | 0.0034   |        |     |
| lsmc | SNP68  | ASL43 | 0 | 1 | 0.5577  | 0.4561   | 3 | 193 | 107.1032 | 0.2579 | 0.0021   |        |     |
| lsmc | SNP69  | ASL44 | 0 | 1 | 0.5577  | 0.4561   | 3 | 193 | 107.1036 | 0.2579 | 0.0021   |        |     |
| lsmc | SNP70  | ASL45 | 0 | 1 | 1.0233  | 0.313    | 3 | 191 | 98.8187  | 0.3189 | 0.0036   |        |     |
| lsmc | SNP71  | ASL46 | 0 | 1 | 0.6861  | 0.4086   | 3 | 182 | 103.9387 | 0.2999 | 0.0026   |        |     |
| lsmc | SNP72  | ASL47 | 0 | 1 | 0.6861  | 0.4086   | 3 | 182 | 103.9398 | 0.2999 | 0.0026   |        |     |
| lsmc | SNP73  | ASL48 | 0 | 1 | 0.2821  | 0.596    | 3 | 181 | 102.7131 | 0.3067 | 0.0011   |        |     |
| lsmc | SNP74  | ASL49 | 0 | 1 | 0.2821  | 0.596    | 3 | 181 | 102.7118 | 0.3067 | 0.0011   |        |     |
| lsmc | SNP30  | ASL5  | 0 | 1 | 3.2654  | 0.0721   | 3 | 219 | 84.2534  | 0.3724 | 0.0094   |        |     |
| lsmc | SNP75  | ASL50 | 0 | 1 | 0.2821  | 0.596    | 3 | 181 | 102.7107 | 0.3067 | 0.0011   |        |     |
| lsmc | SNP76  | ASL51 | 0 | 2 | 2.2141  | 0.1122   | 4 | 179 | 97.2709  | 0.3504 | 0.0161   |        |     |
| lsmc | SNP77  | ASL52 | 0 | 1 | 0.1476  | 0.7014   | 3 | 161 | 112.1866 | 0.2372 | 6.99E-04 |        |     |
| lsmc | SNP78  | ASL53 | 0 | 1 | 2.7949  | 0.0966   | 3 | 155 | 107.8195 | 0.2606 | 0.0133   |        |     |
| lsmc | SNP31  | ASL6  | 0 | 1 | 2.3653  | 0.1255   | 3 | 218 | 85.7416  | 0.3638 | 0.0069   |        |     |
| lsmc | SNP32  | ASL7  | 0 | 1 | 2.3653  | 0.1255   | 3 | 218 | 85.7441  | 0.3638 | 0.0069   |        |     |
| lsmc | SNP33  | ASL8  | 0 | 1 | 3.1305  | 0.0782   | 3 | 219 | 85.1004  | 0.3661 | 0.0091   |        |     |
| lsmc | SNP34  | ASL9  | 0 | 1 | 2.2992  | 0.1309   | 3 | 219 | 85.5121  | 0.3631 | 0.0067   |        |     |
| lsmc | SNP1   | AUX01 | 0 | 1 | 0.0648  | 0.7994   | 3 | 170 | 95.1642  | 0.2171 | 2.98E-04 |        |     |
| lsmc | SNP2   | AUX02 | 0 | 1 | 0.464   | 0.4967   | 3 | 177 | 93.5007  | 0.2265 | 0.002    |        |     |
| lsmc | SNP3   | AUX03 | 0 | 1 | 10.0717 | 0.0018   | 3 | 179 | 103.251  | 0.1393 | 0.0484   | 0.0214 | 225 |
| lsmc | SNP4   | AUX04 | 0 | 1 | 0.6619  | 0.417    | 3 | 180 | 111.0767 | 0.069  | 0.0034   |        |     |
| lsmc | SNP5   | AUX05 | 0 | 2 | 0.959   | 0.3852   | 4 | 181 | 93.8301  | 0.2125 | 0.0083   |        |     |
| lsmc | SNP6   | AUX06 | 0 | 2 | 0.5271  | 0.5912   | 4 | 181 | 91.4937  | 0.2321 | 0.0045   |        |     |
| lsmc | SNP7   | AUX07 | 0 | 1 | 10.0122 | 0.0018   | 3 | 180 | 104.6417 | 0.1242 | 0.0487   | 0.0327 | 225 |
| lsmc | SNP8   | AUX08 | 0 | 2 | 6.3373  | 0.0022   | 4 | 172 | 98.4834  | 0.1994 | 0.059    | 0.0235 | 225 |
| lsmc | SNP9   | AUX09 | 0 | 1 | 12.2757 | 5.84E-04 | 3 | 173 | 99.6622  | 0.1703 | 0.0589   | 0.0056 | 225 |
| lsmc | SNP10  | AUX10 | 0 | 2 | 1.0551  | 0.3504   | 4 | 172 | 111.2416 | 0.0793 | 0.0113   |        |     |
| lsmc | SNP11  | AUX11 | 0 | 2 | 7.8749  | 5.34E-04 | 4 | 172 | 103.1031 | 0.1466 | 0.0781   | 0.0046 | 225 |
| lsmc | SNP12  | AUX12 | 0 | 1 | 7.974   | 0.0053   | 3 | 173 | 105.8811 | 0.1186 | 0.0406   | 0.0297 | 225 |
| lsmc | SNP13  | AUX13 | 0 | 2 | 0.2839  | 0.7532   | 4 | 171 | 97.1809  | 0.2003 | 0.0027   |        |     |
| lsmc | SNP14  | AUX14 | 0 | 2 | 1.1124  | 0.3311   | 4 | 171 | 101.2967 | 0.1665 | 0.0108   |        |     |
| lsmc | SNP15  | AUX15 | 0 | 1 | 8.3791  | 0.0043   | 3 | 169 | 108.4134 | 0.1149 | 0.0439   | 0.0336 | 225 |
| lsmc | SNP16  | AUX16 | 0 | 2 | 0.377   | 0.6865   | 4 | 165 | 103.0055 | 0.1727 | 0.0038   |        |     |
| lsmc | SNP17  | AUX17 | 0 | 1 | 6.3053  | 0.013    | 3 | 166 | 110.4914 | 0.1071 | 0.0339   |        |     |
| lsmc | SNP18  | AUX18 | 0 | 1 | 0.195   | 0.6594   | 3 | 165 | 96.0967  | 0.2242 | 9.17E-04 |        |     |
| lsmc | SNP19  | AUX19 | 0 | 1 | 1.6071  | 0.2067   | 3 | 162 | 100.5545 | 0.1804 | 0.0081   |        |     |
| lsmc | SNP20  | AUX20 | 0 | 1 | 6.8095  | 0.0099   | 3 | 157 | 108.8215 | 0.1056 | 0.0388   | 0.0553 | 225 |
| lsmc | SNP21  | AUX21 | 0 | 1 | 0.2238  | 0.6368   | 3 | 157 | 113.3355 | 0.0685 | 0.0013   |        |     |
| lsmc | SNP22  | AUX22 | 0 | 2 | 6.7756  | 0.0015   | 4 | 154 | 105.9232 | 0.1415 | 0.0755   | 0.0136 | 225 |
| lsmc | SNP23  | AUX23 | 0 | 2 | 0.2199  | 0.8029   | 4 | 154 | 114.841  | 0.0693 | 0.0027   |        |     |
| lsmc | SNP222 | cp1   | 0 | 1 | 0.1062  | 0.7449   | 3 | 208 | 81.8946  | 0.4192 | 2.96E-04 |        |     |
| lsmc | SNP231 | cp10  | 0 | 1 | 1.1133  | 0.2925   | 3 | 219 | 83.6377  | 0.3876 | 0.0031   |        |     |
| lsmc | SNP232 | cp11  | 0 | 1 | 0.0106  | 0.918    | 3 | 219 | 84.5826  | 0.3807 | 3.00E-05 |        |     |
| lsmc | SNP233 | cp12  | 0 | 1 | 0.226   | 0.635    | 3 | 216 | 86.8364  | 0.3624 | 6.67E-04 |        |     |
| lsmc | SNP234 | cp13  | 0 | 1 | 0.7424  | 0.3899   | 3 | 195 | 96.6228  | 0.3075 | 0.0026   |        |     |
| lsmc | SNP235 | cp14  | 0 | 1 | 0.0412  | 0.8393   | 3 | 211 | 78.4211  | 0.4211 | 1.13E-04 |        |     |
| lsmc | SNP223 | cp2   | 0 | 1 | 0.1681  | 0.6822   | 3 | 217 | 83.432   | 0.3912 | 4.72E-04 |        |     |
| lsmc | SNP224 | cp3   | 0 | 1 | 0.9919  | 0.3204   | 3 | 219 | 83.1046  | 0.3915 | 0.0028   |        |     |
| lsmc | SNP225 | cp4   | 0 | 1 | 0.1679  | 0.6824   | 3 | 219 | 83.5681  | 0.3881 | 4.69E-04 |        |     |
| lsmc | SNP226 | cp5   | 0 | 2 | 0.0115  | 0.9886   | 4 | 218 | 84.6768  | 0.3828 | 6.52E-05 |        |     |
| lsmc | SNP227 | cp6   | 0 | 1 | 0.0041  | 0.9491   | 3 | 219 | 84.4649  | 0.3815 | 1.15E-05 |        |     |
| lsmc | SNP228 | cp7   | 0 | 1 | 0.1616  | 0.6881   | 3 | 219 | 83.6236  | 0.3877 | 4.52E-04 |        |     |
| lsmc | SNP229 | cp8   | 0 | 1 | 0.0121  | 0.9126   | 3 | 218 | 84.1115  | 0.3854 | 3.40E-05 |        |     |
| lsmc | SNP230 | cp9   | 0 | 1 | 1.1133  | 0.2925   | 3 | 219 | 83.636   | 0.3876 | 0.0031   |        |     |
| lsmc | SNP236 | Fe1   | 0 | 1 | 2.2682  | 0.1337   | 3 | 191 | 92.2474  | 0.306  | 0.0082   |        |     |
| lsmc | SNP245 | Fe10  | 0 | 1 | 3.4397  | 0.0654   | 3 | 166 | 76.832   | 0.3401 | 0.0137   |        |     |
| lsmc | SNP246 | Fe11  | 0 | 1 | 1.8865  | 0.1715   | 3 | 166 | 76.2764  | 0.3449 | 0.0074   |        |     |
| lsmc | SNP237 | Fe2   | 0 | 1 | 1.139   | 0.2871   | 3 | 204 | 90.109   | 0.3143 | 0.0038   |        |     |
| lsmc | SNP238 | Fe3   | 0 | 1 | 1.0049  | 0.3173   | 3 | 204 | 90.0272  | 0.3149 | 0.0034   |        |     |
| lsmc | SNP239 | Fe4   | 0 | 1 | 1.0407  | 0.3089   | 3 | 205 | 89.4386  | 0.3166 | 0.0035   |        |     |
| lsmc | SNP240 | Fe5   | 0 | 1 | 8.2228  | 0.0945   | 3 | 202 | 88.6093  | 0.3261 | 0.0094   |        |     |
| lsmc | SNP241 | Fe6   | 0 | 1 | 2.0606  | 0.1527   | 3 | 201 | 83.9844  | 0.3601 | 0.0066   |        |     |
| lsmc | SNP242 | Fe7   | 0 | 1 | 0.8952  | 0.3453   | 3 | 192 | 84.3968  | 0.3131 | 0.0032   |        |     |
| lsmc | SNP243 | Fe8   | 0 | 1 | 0.7038  | 0.4026   | 3 | 180 | 67.4847  | 0.4319 | 0.0022   |        |     |

|      |        |        |   |   |          |        |   |     |          |        |          |
|------|--------|--------|---|---|----------|--------|---|-----|----------|--------|----------|
| lsmc | SNP244 | Fe9    | 0 | 1 | 1.3734   | 0.2428 | 3 | 178 | 63.15    | 0.4707 | 0.0041   |
| lsmc | SNP247 | Fum1   | 0 | 1 | 0.9772   | 0.324  | 3 | 219 | 78.6629  | 0.4201 | 0.0026   |
| lsmc | SNP248 | Fum2   | 0 | 2 | 0.3961   | 0.6734 | 4 | 233 | 81.0705  | 0.3905 | 0.0021   |
| lsmc | SNP249 | Fum3   | 0 | 1 | 0.023    | 0.8797 | 3 | 235 | 83.4248  | 0.3806 | 6.05E-05 |
| lsmc | SNP250 | Fum4   | 0 | 1 | 0.6354   | 0.4262 | 3 | 235 | 84.3552  | 0.3737 | 0.0017   |
| lsmc | SNP251 | Fum5   | 0 | 1 | 0.0024   | 0.9608 | 3 | 233 | 83.3865  | 0.3818 | 6.42E-06 |
| lsmc | SNP252 | Fum6   | 0 | 1 | 0.098    | 0.7546 | 3 | 233 | 83.7448  | 0.3792 | 2.61E-04 |
| lsmc | SNP253 | Fum7   | 0 | 1 | 0.1504   | 0.6985 | 3 | 233 | 83.3671  | 0.382  | 3.99E-04 |
| lsmc | SNP254 | Fum8   | 0 | 1 | 0.0105   | 0.9184 | 3 | 233 | 83.3495  | 0.3821 | 2.79E-05 |
| lsmc | SNP255 | Ger1   | 0 | 1 | 3.1034   | 0.0801 | 3 | 153 | 74.8094  | 0.4706 | 0.0107   |
| lsmc | SNP264 | Ger10  | 0 | 1 | 4.0834   | 0.045  | 3 | 156 | 72.2793  | 0.4831 | 0.0135   |
| lsmc | SNP265 | Ger11  | 0 | 1 | 4.0834   | 0.045  | 3 | 156 | 72.2775  | 0.4831 | 0.0135   |
| lsmc | SNP266 | Ger12  | 0 | 1 | 4.0835   | 0.045  | 3 | 156 | 72.2757  | 0.4831 | 0.0135   |
| lsmc | SNP267 | Ger13  | 0 | 1 | 4.0835   | 0.045  | 3 | 156 | 72.2741  | 0.4831 | 0.0135   |
| lsmc | SNP268 | Ger14  | 0 | 1 | 3.9876   | 0.0476 | 3 | 157 | 72.7932  | 0.4768 | 0.0133   |
| lsmc | SNP269 | Ger15  | 0 | 1 | 3.9876   | 0.0476 | 3 | 157 | 72.7949  | 0.4768 | 0.0133   |
| lsmc | SNP270 | Ger16  | 0 | 1 | 1.513    | 0.2205 | 3 | 157 | 81.1623  | 0.4166 | 0.0056   |
| lsmc | SNP271 | Ger17  | 0 | 1 | 1.743    | 0.1887 | 3 | 157 | 81.6864  | 0.4128 | 0.0065   |
| lsmc | SNP272 | Ger18  | 0 | 1 | 3.9849   | 0.0476 | 3 | 157 | 72.8679  | 0.4762 | 0.0133   |
| lsmc | SNP273 | Ger19  | 0 | 1 | 3.8341   | 0.052  | 3 | 156 | 74.3353  | 0.4669 | 0.0131   |
| lsmc | SNP256 | Ger2   | 0 | 1 | 0.0054   | 0.9415 | 3 | 154 | 82.3128  | 0.4162 | 2.05E-05 |
| lsmc | SNP274 | Ger20  | 0 | 1 | 1.12E-04 | 0.9916 | 3 | 156 | 84.9308  | 0.3909 | 4.37E-07 |
| lsmc | SNP275 | Ger21  | 0 | 1 | 3.9848   | 0.0476 | 3 | 157 | 72.8701  | 0.4762 | 0.0133   |
| lsmc | SNP276 | Ger22  | 0 | 1 | 3.9848   | 0.0476 | 3 | 157 | 72.8684  | 0.4762 | 0.0133   |
| lsmc | SNP277 | Ger23  | 0 | 1 | 3.9849   | 0.0476 | 3 | 157 | 72.8668  | 0.4762 | 0.0133   |
| lsmc | SNP278 | Ger24  | 0 | 1 | 1.513    | 0.2205 | 3 | 157 | 81.1628  | 0.4166 | 0.0056   |
| lsmc | SNP279 | Ger25  | 0 | 1 | 3.3773   | 0.068  | 3 | 155 | 68.7555  | 0.5065 | 0.0108   |
| lsmc | SNP280 | Ger26  | 0 | 2 | 2.0782   | 0.1289 | 4 | 142 | 72.792   | 0.4972 | 0.0147   |
| lsmc | SNP257 | Ger3   | 0 | 1 | 4.0126   | 0.0469 | 3 | 154 | 71.8028  | 0.4908 | 0.0133   |
| lsmc | SNP258 | Ger4   | 0 | 1 | 1.6629   | 0.1992 | 3 | 154 | 79.895   | 0.4334 | 0.0061   |
| lsmc | SNP259 | Ger5   | 0 | 1 | 0.0019   | 0.9654 | 3 | 155 | 80.6664  | 0.4249 | 6.99E-06 |
| lsmc | SNP260 | Ger6   | 0 | 1 | 0.0037   | 0.9518 | 3 | 155 | 81.0422  | 0.4222 | 1.37E-05 |
| lsmc | SNP261 | Ger7   | 0 | 1 | 4.0619   | 0.0456 | 3 | 155 | 70.4525  | 0.4977 | 0.0132   |
| lsmc | SNP262 | Ger8   | 0 | 1 | 4.0619   | 0.0456 | 3 | 155 | 70.4501  | 0.4977 | 0.0132   |
| lsmc | SNP263 | Ger9   | 0 | 1 | 7.53E-04 | 0.9781 | 3 | 156 | 82.7401  | 0.4083 | 2.86E-06 |
| lsmc | SNP281 | ICD1   | 0 | 1 | 0.0899   | 0.7646 | 3 | 209 | 96.8471  | 0.2622 | 3.17E-04 |
| lsmc | SNP290 | ICD10  | 0 | 1 | 0.3381   | 0.5615 | 3 | 232 | 87.111   | 0.3575 | 9.36E-04 |
| lsmc | SNP291 | ICD11  | 0 | 1 | 0.2905   | 0.5904 | 3 | 232 | 87.0695  | 0.3578 | 8.04E-04 |
| lsmc | SNP292 | ICD12  | 0 | 1 | 0.1756   | 0.6756 | 3 | 230 | 88.5296  | 0.3501 | 4.96E-04 |
| lsmc | SNP293 | ICD13  | 0 | 1 | 2.9592   | 0.0867 | 3 | 231 | 90.1291  | 0.3356 | 0.0085   |
| lsmc | SNP294 | ICD14  | 0 | 1 | 0.9212   | 0.3382 | 3 | 224 | 88.8704  | 0.3476 | 0.0027   |
| lsmc | SNP282 | ICD2   | 0 | 2 | 0.2439   | 0.7838 | 4 | 216 | 91.3921  | 0.3234 | 0.0015   |
| lsmc | SNP283 | ICD3   | 0 | 1 | 0.3674   | 0.5451 | 3 | 217 | 90.8851  | 0.324  | 0.0011   |
| lsmc | SNP284 | ICD4   | 0 | 1 | 0.0057   | 0.9397 | 3 | 217 | 90.2018  | 0.3317 | 1.77E-05 |
| lsmc | SNP285 | ICD5   | 0 | 1 | 0.2143   | 0.6438 | 3 | 217 | 90.2999  | 0.331  | 6.61E-04 |
| lsmc | SNP286 | ICD6   | 0 | 2 | 0.9793   | 0.3773 | 4 | 206 | 75.4469  | 0.4239 | 0.0055   |
| lsmc | SNP287 | ICD7   | 0 | 1 | 0.2526   | 0.6158 | 3 | 207 | 79.7248  | 0.3883 | 7.47E-04 |
| lsmc | SNP288 | ICD8   | 0 | 1 | 0.2884   | 0.5917 | 3 | 232 | 85.8235  | 0.367  | 7.87E-04 |
| lsmc | SNP289 | ICD9   | 0 | 1 | 0.2884   | 0.5917 | 3 | 232 | 85.825   | 0.367  | 7.87E-04 |
| lsmc | SNP295 | ISL1   | 0 | 1 | 0.249    | 0.6183 | 3 | 195 | 94.391   | 0.3145 | 8.75E-04 |
| lsmc | SNP296 | ISL2   | 0 | 1 | 0.8474   | 0.3584 | 3 | 195 | 91.7974  | 0.3334 | 0.0029   |
| lsmc | SNP297 | ISL3   | 0 | 1 | 3.8024   | 0.0526 | 3 | 193 | 87.5283  | 0.3683 | 0.0124   |
| lsmc | SNP298 | ISL4   | 0 | 1 | 9.624    | 0.0022 | 3 | 191 | 92.0578  | 0.3338 | 0.0336   |
| lsmc | SNP299 | ISL5   | 0 | 1 | 2.2891   | 0.132  | 3 | 185 | 86.9297  | 0.3849 | 0.0076   |
| lsmc | SNP300 | ISL6   | 0 | 1 | 0.4621   | 0.4975 | 3 | 184 | 96.3468  | 0.3146 | 0.0017   |
| lsmc | SNP301 | ME1    | 0 | 1 | 0.2577   | 0.6122 | 3 | 220 | 81.4329  | 0.3888 | 7.16E-04 |
| lsmc | SNP310 | ME10   | 0 | 1 | 0.041    | 0.8397 | 3 | 211 | 80.7026  | 0.3955 | 1.18E-04 |
| lsmc | SNP311 | ME11   | 0 | 1 | 0.7528   | 0.3866 | 3 | 210 | 78.8999  | 0.4111 | 0.0021   |
| lsmc | SNP312 | ME12   | 0 | 3 | 0.7943   | 0.4983 | 5 | 207 | 76.6887  | 0.4356 | 0.0065   |
| lsmc | SNP302 | ME2    | 0 | 1 | 0.4051   | 0.5251 | 3 | 220 | 82.8008  | 0.3785 | 0.0011   |
| lsmc | SNP303 | ME3    | 0 | 1 | 0.0472   | 0.8281 | 3 | 220 | 83.7488  | 0.3714 | 1.35E-04 |
| lsmc | SNP304 | ME4    | 0 | 1 | 0.3604   | 0.5489 | 3 | 220 | 83.0196  | 0.3769 | 0.001    |
| lsmc | SNP305 | ME5    | 0 | 1 | 1.6753   | 0.1969 | 3 | 220 | 83.1357  | 0.376  | 0.0048   |
| lsmc | SNP306 | ME6    | 0 | 3 | 1.2785   | 0.2826 | 5 | 218 | 83.6662  | 0.3777 | 0.0109   |
| lsmc | SNP307 | ME7    | 0 | 1 | 0.1124   | 0.7378 | 3 | 217 | 82.0005  | 0.3905 | 3.16E-04 |
| lsmc | SNP308 | ME8    | 0 | 1 | 0.0857   | 0.77   | 3 | 217 | 82.347   | 0.3879 | 2.42E-04 |
| lsmc | SNP309 | ME9    | 0 | 1 | 0.0468   | 0.829  | 3 | 211 | 80.5389  | 0.3968 | 1.34E-04 |
| lsmc | SNP313 | P13K1  | 0 | 1 | 1.5486   | 0.2146 | 3 | 223 | 91.8344  | 0.3329 | 0.0046   |
| lsmc | SNP322 | P13K10 | 0 | 1 | 0.0023   | 0.962  | 3 | 185 | 67.8236  | 0.5151 | 5.96E-06 |
| lsmc | SNP314 | P13K2  | 0 | 1 | 0.1042   | 0.7472 | 3 | 223 | 88.9716  | 0.3537 | 3.02E-04 |
| lsmc | SNP315 | P13K3  | 0 | 1 | 0.0394   | 0.8428 | 3 | 223 | 89.2051  | 0.352  | 1.15E-04 |
| lsmc | SNP316 | P13K4  | 0 | 1 | 1.067    | 0.3027 | 3 | 223 | 90.3982  | 0.3433 | 0.0031   |
| lsmc | SNP317 | P13K5  | 0 | 1 | 0.2488   | 0.6184 | 3 | 223 | 88.9368  | 0.3539 | 7.21E-04 |
| lsmc | SNP318 | P13K6  | 0 | 1 | 0.7577   | 0.385  | 3 | 223 | 88.3666  | 0.3581 | 0.0022   |
| lsmc | SNP319 | P13K7  | 0 | 1 | 0.0609   | 0.8054 | 3 | 223 | 89.3954  | 0.3506 | 1.77E-04 |
| lsmc | SNP320 | P13K8  | 0 | 1 | 0.7425   | 0.3898 | 3 | 221 | 89.2851  | 0.3572 | 0.0022   |
| lsmc | SNP321 | P13K9  | 0 | 1 | 0.7457   | 0.3888 | 3 | 221 | 91.371   | 0.3422 | 0.0022   |
| lsmc | SNP323 | PME1   | 0 | 1 | 0.7824   | 0.3773 | 3 | 236 | 83.9828  | 0.377  | 0.0021   |
| lsmc | SNP324 | PME2   | 0 | 1 | 1.5861   | 0.2091 | 3 | 236 | 87.0263  | 0.3544 | 0.0043   |
| lsmc | SNP325 | PME3   | 0 | 1 | 1.688    | 0.1952 | 3 | 232 | 88.2092  | 0.3459 | 0.0048   |
| lsmc | SNP326 | SAH1   | 0 | 1 | 0.0421   | 0.8377 | 3 | 176 | 100.5551 | 0.2473 | 1.80E-04 |
| lsmc | SNP327 | SAH2   | 0 | 1 | 0.0889   | 0.7659 | 3 | 176 | 101.483  | 0.2403 | 3.84E-04 |
| lsmc | SNP328 | SAH3   | 0 | 1 | 0.0081   | 0.9283 | 3 | 176 | 101.2837 | 0.2418 | 3.50E-05 |
| lsmc | SNP329 | SAH4   | 0 | 1 | 0.1435   | 0.7053 | 3 | 176 | 100.5072 | 0.2476 | 6.13E-04 |
| lsmc | SNP330 | SAH5   | 0 | 2 | 0.4934   | 0.6114 | 4 | 171 | 102.1021 | 0.2259 | 0.0045   |
| lsmc | SNP331 | SAH6   | 0 | 1 | 0.0546   | 0.8157 | 3 | 113 | 99.4956  | 0.2066 | 3.83E-04 |

0.0137 225
