# Supplementary material for: Association and Linkage Analysis of Aluminum Tolerance Genes in Maize
Source: PubMed Central journal article supplement (PMC2848604; doi:10.1371/journal.pone.0009958), 2010-04-01
Supplement: pone.0009958.s004.pdf [file pone.0009958.s004.pdf]

| FAMILY     | INDIVIDUAL     | IRG | FRG | NRG | PME | ME | ISL | ALMT | SAHH | ZmASL |
|------------|----------------|-----|-----|-----|-----|----|-----|------|------|-------|
| B73xCML247 | B73xCML247_003 | 81  | 161 | 80  |     |    |     |      | H    |       |
| B73xCML247 | B73xCML247_004 | 54  | 107 | 53  |     |    |     |      | H    |       |
| B73xCML247 | B73xCML247_005 | 61  | 126 | 65  |     |    |     |      | B    | A     |
| B73xCML247 | B73xCML247_007 | 82  | 163 | 81  |     |    |     |      | A    | H     |
| B73xCML247 | B73xCML247_008 | 74  | 143 | 69  |     |    |     |      | A    | H     |
| B73xCML247 | B73xCML247_009 | 104 | 194 | 90  |     |    |     |      | A    | H     |
| B73xCML247 | B73xCML247_010 | 57  | 106 | 49  |     |    |     |      | H    | H     |
| B73xCML247 | B73xCML247_011 | 52  | 108 | 56  |     |    |     |      | B    | A     |
| B73xCML247 | B73xCML247_013 | 97  | 193 | 96  |     |    |     |      | A    | H     |
| B73xCML247 | B73xCML247_014 | 62  | 117 | 55  |     |    |     |      | B    | A     |
| B73xCML247 | B73xCML247_015 | 98  | 172 | 74  |     |    |     |      | A    |       |
| B73xCML247 | B73xCML247_016 | 94  | 142 | 48  |     |    |     |      | A    | H     |
| B73xCML247 | B73xCML247_017 | 65  | 109 | 44  |     |    |     |      | B    | B     |
| B73xCML247 | B73xCML247_018 | 75  | 127 | 52  |     |    |     |      | B    | B     |
| B73xCML247 | B73xCML247_019 | 77  | 172 | 95  |     |    |     |      | A    | H     |
| B73xCML247 | B73xCML247_020 | 87  | 172 | 85  |     |    |     |      | B    | B     |
| B73xCML247 | B73xCML247_021 | 70  | 107 | 37  |     |    |     |      | H    |       |
| B73xCML247 | B73xCML247_024 | 75  | 158 | 83  |     |    |     |      |      | A     |
| B73xCML247 | B73xCML247_025 | 85  | 161 | 76  |     |    |     |      | H    |       |
| B73xCML247 | B73xCML247_026 | 76  | 139 | 63  |     |    |     |      | A    | H     |
| B73xCML247 | B73xCML247_027 | 63  | 116 | 53  |     |    |     |      | A    |       |
| B73xCML247 | B73xCML247_029 | 87  | 146 | 59  |     |    |     |      | B    | H     |
| B73xCML247 | B73xCML247_030 | 85  | 149 | 64  |     |    |     |      | B    | H     |
| B73xCML247 | B73xCML247_033 | 67  | 122 | 55  |     |    |     |      | B    | A     |
| B73xCML247 | B73xCML247_035 | 59  | 117 | 58  |     |    |     |      | B    | H     |
| B73xCML247 | B73xCML247_036 | 61  | 122 | 61  |     |    |     |      | H    | H     |
| B73xCML247 | B73xCML247_037 | 74  | 140 | 66  |     |    |     |      | H    | A     |
| B73xCML247 | B73xCML247_038 | 60  | 142 | 82  |     |    |     |      | H    |       |
| B73xCML247 | B73xCML247_039 | 103 | 198 | 95  |     |    |     |      | H    | A     |
| B73xCML247 | B73xCML247_040 | 70  | 122 | 52  |     |    |     |      | H    | B     |
| B73xCML247 | B73xCML247_041 | 66  | 122 | 56  |     |    |     |      | A    | H     |
| B73xCML247 | B73xCML247_042 | 68  | 134 | 66  |     |    |     |      | H    | A     |
| B73xCML247 | B73xCML247_043 | 98  | 188 | 90  |     |    |     |      | A    |       |
| B73xCML247 | B73xCML247_044 | 56  | 127 | 71  |     |    |     |      | A    | H     |
| B73xCML247 | B73xCML247_045 | 52  | 120 | 68  |     |    |     |      | H    | H     |
| B73xCML247 | B73xCML247_046 | 74  | 129 | 55  |     |    |     |      | B    |       |
| B73xCML247 | B73xCML247_047 | 72  | 155 | 83  |     |    |     |      | A    | A     |
| B73xCML247 | B73xCML247_048 | 89  | 171 | 82  |     |    |     |      |      | B     |
| B73xCML247 | B73xCML247_049 | 73  | 152 | 79  |     |    |     |      | A    | H     |
| B73xCML247 | B73xCML247_051 | 85  | 153 | 68  |     |    |     |      | A    | B     |
| B73xCML247 | B73xCML247_052 | 61  | 153 | 92  |     |    |     |      | A    | A     |
| B73xCML247 | B73xCML247_054 | 65  | 117 | 52  |     |    |     |      | A    |       |
| B73xCML247 | B73xCML247_055 | 65  | 151 | 86  |     |    |     |      | A    |       |
| B73xCML247 | B73xCML247_056 | 72  | 146 | 74  |     |    |     |      | A    | A     |
| B73xCML247 | B73xCML247_057 | 68  | 157 | 89  |     |    |     |      | A    |       |
| B73xCML247 | B73xCML247_058 | 76  | 145 | 69  |     |    |     |      | B    | H     |
| B73xCML247 | B73xCML247_059 | 47  | 95  | 48  |     |    |     |      | B    |       |
| B73xCML247 | B73xCML247_061 | 54  | 135 | 81  |     |    |     |      |      | A     |
| B73xCML247 | B73xCML247_062 | 66  | 134 | 68  |     |    |     |      | A    | H     |
| B73xCML247 | B73xCML247_063 | 66  | 136 | 70  |     |    |     |      | A    | B     |
| B73xCML247 | B73xCML247_064 | 58  | 102 | 44  |     |    |     |      | B    | H     |
| B73xCML247 | B73xCML247_065 | 64  | 97  | 33  |     |    |     |      | H    | B     |

|            |                |     |     |     |   |   |
|------------|----------------|-----|-----|-----|---|---|
| B73xCML247 | B73xCML247_066 | 71  | 136 | 65  | H |   |
| B73xCML247 | B73xCML247_067 | 68  | 132 | 64  | B | H |
| B73xCML247 | B73xCML247_068 | 57  | 119 | 62  | H | A |
| B73xCML247 | B73xCML247_069 | 62  | 112 | 50  | B | B |
| B73xCML247 | B73xCML247_070 | 90  | 170 | 80  | H | B |
| B73xCML247 | B73xCML247_072 | 91  | 160 | 69  | B |   |
| B73xCML247 | B73xCML247_073 | 70  | 135 | 65  | B | A |
| B73xCML247 | B73xCML247_074 | 75  | 147 | 72  | B | H |
| B73xCML247 | B73xCML247_075 | 98  | 150 | 52  | B | H |
| B73xCML247 | B73xCML247_076 | 75  | 128 | 53  | H | A |
| B73xCML247 | B73xCML247_077 | 58  | 99  | 41  | H | B |
| B73xCML247 | B73xCML247_078 | 61  | 127 | 66  | H |   |
| B73xCML247 | B73xCML247_079 | 62  | 95  | 33  | H | H |
| B73xCML247 | B73xCML247_080 | 69  | 141 | 72  | H | B |
| B73xCML247 | B73xCML247_081 | 82  | 138 | 56  | H | B |
| B73xCML247 | B73xCML247_082 | 80  | 172 | 92  | B | H |
| B73xCML247 | B73xCML247_083 | 54  | 130 | 76  | H | H |
| B73xCML247 | B73xCML247_084 | 95  | 177 | 82  | H |   |
| B73xCML247 | B73xCML247_085 | 106 | 173 | 67  | B | H |
| B73xCML247 | B73xCML247_089 | 90  | 145 | 55  | H |   |
| B73xCML247 | B73xCML247_091 | 75  | 164 | 89  |   | A |
| B73xCML247 | B73xCML247_092 | 64  | 131 | 67  |   | B |
| B73xCML247 | B73xCML247_093 | 73  | 154 | 81  | H |   |
| B73xCML247 | B73xCML247_094 | 63  | 133 | 70  |   | A |
| B73xCML247 | B73xCML247_095 | 64  | 129 | 65  | A |   |
| B73xCML247 | B73xCML247_096 | 67  | 145 | 78  | H |   |
| B73xCML247 | B73xCML247_097 | 86  | 162 | 76  |   | H |
| B73xCML247 | B73xCML247_098 | 53  | 103 | 50  | H | B |
| B73xCML247 | B73xCML247_100 | 84  | 170 | 86  | B | H |
| B73xCML247 | B73xCML247_101 | 91  | 191 | 100 |   | H |
| B73xCML247 | B73xCML247_102 | 48  | 104 | 56  | H | B |
| B73xCML247 | B73xCML247_103 | 67  | 107 | 40  |   | H |
| B73xCML247 | B73xCML247_108 | 54  | 116 | 62  |   | A |
| B73xCML247 | B73xCML247_109 | 84  | 165 | 81  |   | H |
| B73xCML247 | B73xCML247_111 | 49  | 100 | 51  | A |   |
| B73xCML247 | B73xCML247_112 | 65  | 129 | 64  | H | A |
| B73xCML247 | B73xCML247_115 | 69  | 151 | 82  | A | B |
| B73xCML247 | B73xCML247_116 | 78  | 156 | 78  | H | B |
| B73xCML247 | B73xCML247_117 | 59  | 119 | 60  | H | B |
| B73xCML247 | B73xCML247_118 | 56  | 117 | 61  |   | A |
| B73xCML247 | B73xCML247_120 | 69  | 164 | 95  |   | B |
| B73xCML247 | B73xCML247_121 | 88  | 158 | 70  | H | H |
| B73xCML247 | B73xCML247_122 | 62  | 128 | 66  | H | B |
| B73xCML247 | B73xCML247_123 | 51  | 115 | 64  | B | B |
| B73xCML247 | B73xCML247_124 | 58  | 106 | 48  | B | A |
| B73xCML247 | B73xCML247_125 | 63  | 111 | 48  | H | B |
| B73xCML247 | B73xCML247_126 | 73  | 137 | 64  | H | H |
| B73xCML247 | B73xCML247_127 | 73  | 148 | 75  | B | H |
| B73xCML247 | B73xCML247_129 | 30  | 70  | 40  | A | B |
| B73xCML247 | B73xCML247_130 | 77  | 160 | 83  | H | H |
| B73xCML247 | B73xCML247_132 | 66  | 125 | 59  | H | H |
| B73xCML247 | B73xCML247_133 | 81  | 163 | 82  | B | H |
| B73xCML247 | B73xCML247_135 | 66  | 155 | 89  | H | H |

|            |                |     |     |     |   |   |   |   |
|------------|----------------|-----|-----|-----|---|---|---|---|
| B73xCML247 | B73xCML247_136 | 65  | 149 | 84  |   |   | B | H |
| B73xCML247 | B73xCML247_138 | 69  | 150 | 81  |   |   | H | B |
| B73xCML247 | B73xCML247_144 | 70  | 157 | 87  |   |   | H | A |
| B73xCML247 | B73xCML247_145 | 76  | 147 | 71  |   |   | B | B |
| B73xCML247 | B73xCML247_146 | 58  | 97  | 39  |   |   |   | H |
| B73xCML247 | B73xCML247_147 | 76  | 170 | 94  |   |   |   | A |
| B73xCML247 | B73xCML247_148 | 58  | 119 | 61  |   |   | H | B |
| B73xCML247 | B73xCML247_149 | 68  | 115 | 47  |   |   | H | A |
| B73xCML247 | B73xCML247_150 | 71  | 151 | 80  |   |   | H | H |
| B73xCML247 | B73xCML247_151 | 83  | 165 | 82  |   |   | H | A |
| B73xCML247 | B73xCML247_152 | 100 | 170 | 70  |   |   | B | A |
| B73xCML247 | B73xCML247_153 | 57  | 137 | 80  |   |   | B | A |
| B73xCML247 | B73xCML247_154 | 83  | 173 | 90  |   |   | H | H |
| B73xCML247 | B73xCML247_156 | 84  | 158 | 74  |   |   | A | H |
| B73xCML247 | B73xCML247_157 | 68  | 135 | 67  |   |   | H | H |
| B73xCML247 | B73xCML247_158 | 65  | 153 | 88  |   |   | A | H |
| B73xCML247 | B73xCML247_159 | 83  | 143 | 60  |   |   | H | B |
| B73xCML247 | B73xCML247_161 | 73  | 132 | 59  |   |   | H | H |
| B73xCML247 | B73xCML247_162 | 81  | 162 | 81  |   |   | H | H |
| B73xCML247 | B73xCML247_163 | 73  | 119 | 46  |   |   | A | H |
| B73xCML247 | B73xCML247_164 | 89  | 181 | 92  |   |   | H | H |
| B73xCML247 | B73xCML247_165 | 45  | 96  | 51  |   |   | H | B |
| B73xCML247 | B73xCML247_166 | 55  | 107 | 52  |   |   | H | A |
| B73xCML247 | B73xCML247_168 | 71  | 160 | 89  |   |   | A | A |
| B73xCML247 | B73xCML247_170 | 60  | 115 | 55  |   |   | B | H |
| B73xCML247 | B73xCML247_171 | 54  | 118 | 64  |   |   | B | A |
| B73xCML247 | B73xCML247_172 | 62  | 148 | 86  |   |   | H | A |
| B73xCML247 | B73xCML247_173 | 70  | 162 | 92  |   |   | A | H |
| B73xCML247 | B73xCML247_174 | 75  | 150 | 75  |   |   | B | H |
| B73xCML247 | B73xCML247_175 | 53  | 103 | 50  |   |   | H | B |
| B73xCML247 | B73xCML247_176 | 83  | 131 | 48  |   |   | B | B |
| B73xCML247 | B73xCML247_177 | 102 | 147 | 45  |   |   | H | B |
| B73xCML247 | B73xCML247_178 | 70  | 142 | 72  |   |   | A | A |
| B73xCML247 | B73xCML247_180 | 79  | 161 | 82  |   |   |   | A |
| B73xCML247 | B73xCML247_181 | 71  | 127 | 56  |   |   | H | B |
| B73xCML247 | B73xCML247_182 | 80  | 131 | 51  |   |   | H | H |
| B73xCML247 | B73xCML247_183 | 94  | 171 | 77  |   |   | H | H |
| B73xCML247 | B73xCML247_185 | 59  | 94  | 35  |   |   | B | A |
| B73xCML247 | B73xCML247_186 | 79  | 157 | 78  |   |   | A | H |
| B73xCML247 | B73xCML247_187 | 70  | 125 | 55  |   |   | H | A |
| B73xCML247 | B73xCML247_188 | 75  | 139 | 64  |   |   | B | H |
| B73xCML247 | B73xCML247_189 | 85  | 167 | 82  |   |   | B | B |
| B73xCML247 | B73xCML247_190 | 67  | 111 | 44  |   |   |   | B |
| B73xCML333 | B73xCML333_339 | 40  | 175 | 135 | A |   |   |   |
| B73xCML333 | B73xCML333_340 | 99  | 165 | 66  | A | H |   |   |
| B73xCML333 | B73xCML333_341 | 128 | 190 | 62  | B |   |   |   |
| B73xCML333 | B73xCML333_342 | 99  | 144 | 45  | H |   |   |   |
| B73xCML333 | B73xCML333_343 | 108 | 180 | 72  | A |   |   |   |
| B73xCML333 | B73xCML333_344 | 101 | 181 | 80  | A | H |   |   |
| B73xCML333 | B73xCML333_345 | 81  | 129 | 48  | B |   |   |   |
| B73xCML333 | B73xCML333_346 | 91  | 159 | 68  | B |   |   |   |
| B73xCML333 | B73xCML333_347 | 71  | 144 | 73  | H |   |   |   |
| B73xCML333 | B73xCML333_349 | 68  | 115 | 47  | A |   |   |   |

|            |                |     |     |     |   |   |
|------------|----------------|-----|-----|-----|---|---|
| B73xCML333 | B73xCML333_350 | 49  | 85  | 36  | B | H |
| B73xCML333 | B73xCML333_351 | 57  | 85  | 28  | B | H |
| B73xCML333 | B73xCML333_354 | 50  | 130 | 80  | A |   |
| B73xCML333 | B73xCML333_355 | 88  | 117 | 29  | A | B |
| B73xCML333 | B73xCML333_356 | 78  | 109 | 31  | B | H |
| B73xCML333 | B73xCML333_359 | 78  | 127 | 49  | A |   |
| B73xCML333 | B73xCML333_360 | 54  | 95  | 41  | H | H |
| B73xCML333 | B73xCML333_361 | 79  | 140 | 61  | H |   |
| B73xCML333 | B73xCML333_362 | 68  | 135 | 67  | B | H |
| B73xCML333 | B73xCML333_363 | 102 | 153 | 51  | A | H |
| B73xCML333 | B73xCML333_364 | 88  | 150 | 62  | B | A |
| B73xCML333 | B73xCML333_365 | 76  | 147 | 71  | A | A |
| B73xCML333 | B73xCML333_366 | 65  | 139 | 74  | A | B |
| B73xCML333 | B73xCML333_367 | 98  | 137 | 39  | H |   |
| B73xCML333 | B73xCML333_368 | 85  | 165 | 80  | B |   |
| B73xCML333 | B73xCML333_369 | 105 | 143 | 38  | H | A |
| B73xCML333 | B73xCML333_370 | 51  | 95  | 44  | H | H |
| B73xCML333 | B73xCML333_371 | 74  | 139 | 65  | H | A |
| B73xCML333 | B73xCML333_372 | 87  | 107 | 20  | H |   |
| B73xCML333 | B73xCML333_373 | 86  | 139 | 53  | H |   |
| B73xCML333 | B73xCML333_374 | 68  | 128 | 60  | H | H |
| B73xCML333 | B73xCML333_375 | 74  | 128 | 54  | H | B |
| B73xCML333 | B73xCML333_376 | 98  | 143 | 45  | A |   |
| B73xCML333 | B73xCML333_377 | 91  | 127 | 36  | H |   |
| B73xCML333 | B73xCML333_378 | 92  | 124 | 32  | H | H |
| B73xCML333 | B73xCML333_379 | 86  | 172 | 86  | A | H |
| B73xCML333 | B73xCML333_380 | 56  | 146 | 90  | A | H |
| B73xCML333 | B73xCML333_381 | 93  | 147 | 54  | A | B |
| B73xCML333 | B73xCML333_382 | 99  | 149 | 50  | H |   |
| B73xCML333 | B73xCML333_383 | 68  | 105 | 37  | H |   |
| B73xCML333 | B73xCML333_384 | 79  | 178 | 99  | H | A |
| B73xCML333 | B73xCML333_385 | 78  | 162 | 84  | A | A |
| B73xCML333 | B73xCML333_386 | 71  | 161 | 90  | A | B |
| B73xCML333 | B73xCML333_387 | 78  | 149 | 71  | B | B |
| B73xCML333 | B73xCML333_388 | 74  | 142 | 68  | B | H |
| B73xCML333 | B73xCML333_389 | 93  | 147 | 54  | H | A |
| B73xCML333 | B73xCML333_390 | 77  | 122 | 45  | A | A |
| B73xCML333 | B73xCML333_391 | 80  | 127 | 47  | H | A |
| B73xCML333 | B73xCML333_392 | 100 | 150 | 50  | B | H |
| B73xCML333 | B73xCML333_393 | 62  | 173 | 111 | H | H |
| B73xCML333 | B73xCML333_394 | 43  | 129 | 86  | H | H |
| B73xCML333 | B73xCML333_395 | 75  | 159 | 84  | B | H |
| B73xCML333 | B73xCML333_396 | 57  | 148 | 91  | A |   |
| B73xCML333 | B73xCML333_397 | 106 | 130 | 24  | B | H |
| B73xCML333 | B73xCML333_398 | 50  | 124 | 74  | H | H |
| B73xCML333 | B73xCML333_399 | 105 | 158 | 53  | B |   |
| B73xCML333 | B73xCML333_400 | 95  | 136 | 41  | A | B |
| B73xCML333 | B73xCML333_401 | 62  | 93  | 31  |   | H |
| B73xCML333 | B73xCML333_402 | 81  | 135 | 54  | B | H |
| B73xCML333 | B73xCML333_403 | 90  | 145 | 55  | A | H |
| B73xCML333 | B73xCML333_404 | 91  | 140 | 49  | A | A |
| B73xCML333 | B73xCML333_405 | 85  | 132 | 47  | A |   |
| B73xCML333 | B73xCML333_406 | 86  | 115 | 29  | B | A |

|            |                |     |     |     |   |   |
|------------|----------------|-----|-----|-----|---|---|
| B73xCML333 | B73xCML333_407 | 59  | 151 | 92  | H | A |
| B73xCML333 | B73xCML333_408 | 114 | 131 | 17  | H | A |
| B73xCML333 | B73xCML333_409 | 82  | 159 | 77  | H |   |
| B73xCML333 | B73xCML333_410 | 84  | 119 | 35  | A |   |
| B73xCML333 | B73xCML333_411 | 108 | 140 | 32  | H | B |
| B73xCML333 | B73xCML333_412 | 85  | 158 | 73  | H | H |
| B73xCML333 | B73xCML333_413 | 39  | 157 | 118 | H | H |
| B73xCML333 | B73xCML333_414 | 79  | 170 | 91  | A |   |
| B73xCML333 | B73xCML333_415 | 77  | 125 | 48  | A | A |
| B73xCML333 | B73xCML333_416 | 88  | 148 | 60  | B | B |
| B73xCML333 | B73xCML333_417 | 103 | 171 | 68  | A |   |
| B73xCML333 | B73xCML333_418 | 108 | 168 | 60  | B |   |
| B73xCML333 | B73xCML333_420 | 109 | 200 | 91  | H | H |
| B73xCML333 | B73xCML333_421 | 68  | 156 | 88  | A |   |
| B73xCML333 | B73xCML333_422 | 97  | 154 | 57  | B |   |
| B73xCML333 | B73xCML333_423 | 95  | 180 | 85  | B | B |
| B73xCML333 | B73xCML333_424 | 70  | 130 | 60  | A |   |
| B73xCML333 | B73xCML333_425 | 72  | 123 | 51  | H | A |
| B73xCML333 | B73xCML333_426 | 102 | 183 | 81  | H | A |
| B73xCML333 | B73xCML333_427 | 70  | 145 | 75  | A | A |
| B73xCML333 | B73xCML333_428 | 93  | 152 | 59  | A |   |
| B73xCML333 | B73xCML333_429 | 82  | 153 | 71  | H | A |
| B73xCML333 | B73xCML333_430 | 73  | 94  | 21  | B | H |
| B73xCML333 | B73xCML333_432 | 62  | 105 | 43  | H |   |
| B73xCML333 | B73xCML333_433 | 84  | 150 | 66  | H | A |
| B73xCML333 | B73xCML333_434 | 66  | 137 | 71  | H |   |
| B73xCML333 | B73xCML333_435 | 83  | 144 | 61  | A | A |
| B73xCML333 | B73xCML333_436 | 91  | 133 | 42  | H |   |
| B73xCML333 | B73xCML333_437 | 97  | 167 | 70  | A |   |
| B73xCML333 | B73xCML333_438 | 71  | 138 | 67  | H | H |
| B73xCML333 | B73xCML333_440 | 78  | 142 | 64  | H | H |
| B73xCML333 | B73xCML333_441 | 81  | 156 | 75  | A |   |
| B73xCML333 | B73xCML333_442 | 74  | 102 | 28  | B |   |
| B73xCML333 | B73xCML333_443 | 120 | 198 | 78  | H |   |
| B73xCML333 | B73xCML333_444 | 82  | 139 | 57  | A |   |
| B73xCML333 | B73xCML333_445 | 77  | 134 | 57  | A |   |
| B73xCML333 | B73xCML333_446 | 109 | 165 | 56  | H | A |
| B73xCML333 | B73xCML333_447 | 114 | 204 | 90  | A |   |
| B73xCML333 | B73xCML333_448 | 61  | 102 | 41  | B | B |
| B73xCML333 | B73xCML333_449 | 104 | 163 | 59  | B | H |
| B73xCML333 | B73xCML333_450 | 92  | 155 | 63  |   | B |
| B73xCML333 | B73xCML333_455 | 35  | 90  | 55  | H |   |
| B73xCML333 | B73xCML333_456 | 73  | 153 | 80  | H | A |
| B73xCML333 | B73xCML333_458 | 68  | 125 | 57  | A | B |
| B73xCML333 | B73xCML333_459 | 117 | 171 | 54  | A |   |
| B73xCML333 | B73xCML333_460 | 92  | 139 | 47  | H | B |
| B73xCML333 | B73xCML333_461 | 82  | 145 | 63  | H |   |
| B73xCML333 | B73xCML333_463 | 52  | 110 | 58  | H | A |
| B73xCML333 | B73xCML333_464 | 74  | 129 | 55  | H | H |
| B73xCML333 | B73xCML333_465 | 57  | 121 | 64  | A | B |
| B73xCML333 | B73xCML333_467 | 71  | 127 | 56  | A |   |
| B73xCML333 | B73xCML333_468 | 73  | 140 | 67  | B | B |
| B73xCML333 | B73xCML333_469 | 89  | 128 | 39  | B | B |

|            |                |     |     |    |   |   |
|------------|----------------|-----|-----|----|---|---|
| B73xCML333 | B73xCML333_470 | 98  | 143 | 45 | H | A |
| B73xCML333 | B73xCML333_471 | 89  | 138 | 49 | B |   |
| B73xCML333 | B73xCML333_472 | 93  | 135 | 42 | H |   |
| B73xCML333 | B73xCML333_473 | 85  | 149 | 64 | B |   |
| B73xCML333 | B73xCML333_474 | 84  | 142 | 58 | H |   |
| B73xCML333 | B73xCML333_475 | 79  | 110 | 31 | H | H |
| B73xCML333 | B73xCML333_476 | 93  | 155 | 62 | B |   |
| B73xCML333 | B73xCML333_477 | 84  | 105 | 21 | H |   |
| B73xCML333 | B73xCML333_478 | 98  | 179 | 81 | A |   |
| B73xCML333 | B73xCML333_479 | 94  | 153 | 59 |   | H |
| B73xCML333 | B73xCML333_480 | 65  | 102 | 37 | H | B |
| B73xCML333 | B73xCML333_481 | 72  | 109 | 37 | A | A |
| B73xCML333 | B73xCML333_482 | 76  | 133 | 57 | A |   |
| B73xCML333 | B73xCML333_483 | 84  | 112 | 28 | H |   |
| B73xCML333 | B73xCML333_484 | 79  | 130 | 51 | H |   |
| B73xCML333 | B73xCML333_486 | 57  | 111 | 54 | A |   |
| B73xCML333 | B73xCML333_489 | 96  | 152 | 56 | H |   |
| B73xNC350  | B73xNC350_001  | 65  | 105 | 40 |   | A |
| B73xNC350  | B73xNC350_002  | 58  | 102 | 44 |   | B |
| B73xNC350  | B73xNC350_005  | 63  | 125 | 62 |   | A |
| B73xNC350  | B73xNC350_006  | 100 | 145 | 45 |   | H |
| B73xNC350  | B73xNC350_007  | 70  | 125 | 55 |   | B |
| B73xNC350  | B73xNC350_008  | 66  | 114 | 48 |   | H |
| B73xNC350  | B73xNC350_009  | 79  | 113 | 34 |   | H |
| B73xNC350  | B73xNC350_010  | 68  | 126 | 58 |   | B |
| B73xNC350  | B73xNC350_011  | 80  | 121 | 41 |   | H |
| B73xNC350  | B73xNC350_012  | 70  | 120 | 50 |   | H |
| B73xNC350  | B73xNC350_013  | 75  | 119 | 44 |   | A |
| B73xNC350  | B73xNC350_014  | 70  | 119 | 49 |   | H |
| B73xNC350  | B73xNC350_015  | 75  | 120 | 45 |   | A |
| B73xNC350  | B73xNC350_016  | 82  | 145 | 63 |   | H |
| B73xNC350  | B73xNC350_017  | 67  | 125 | 58 |   | B |
| B73xNC350  | B73xNC350_018  | 66  | 115 | 49 |   | A |
| B73xNC350  | B73xNC350_019  | 65  | 114 | 49 |   | H |
| B73xNC350  | B73xNC350_020  | 60  | 106 | 46 |   | H |
| B73xNC350  | B73xNC350_021  | 77  | 133 | 56 |   | H |
| B73xNC350  | B73xNC350_025  | 65  | 114 | 49 |   | H |
| B73xNC350  | B73xNC350_026  | 67  | 115 | 48 |   | H |
| B73xNC350  | B73xNC350_030  | 42  | 92  | 50 |   | B |
| B73xNC350  | B73xNC350_031  | 68  | 95  | 27 |   | H |
| B73xNC350  | B73xNC350_032  | 72  | 128 | 56 |   | H |
| B73xNC350  | B73xNC350_033  | 46  | 82  | 36 |   | H |
| B73xNC350  | B73xNC350_034  | 54  | 102 | 48 |   | A |
| B73xNC350  | B73xNC350_036  | 76  | 121 | 45 |   | B |
| B73xNC350  | B73xNC350_037  | 70  | 106 | 36 |   | H |
| B73xNC350  | B73xNC350_038  | 67  | 131 | 64 |   | H |
| B73xNC350  | B73xNC350_039  | 50  | 66  | 16 |   | H |
| B73xNC350  | B73xNC350_040  | 55  | 80  | 25 |   | H |
| B73xNC350  | B73xNC350_041  | 87  | 138 | 51 |   | A |
| B73xNC350  | B73xNC350_042  | 74  | 126 | 52 |   | H |
| B73xNC350  | B73xNC350_043  | 66  | 124 | 58 |   | H |
| B73xNC350  | B73xNC350_045  | 67  | 95  | 28 |   | A |
| B73xNC350  | B73xNC350_047  | 68  | 110 | 42 |   | A |

|           |               |    |     |      |   |
|-----------|---------------|----|-----|------|---|
| B73xNC350 | B73xNC350_048 | 67 | 115 | 48   | B |
| B73xNC350 | B73xNC350_049 | 54 | 102 | 48   | B |
| B73xNC350 | B73xNC350_050 | 76 | 104 | 28   | H |
| B73xNC350 | B73xNC350_051 | 66 | 95  | 29   | A |
| B73xNC350 | B73xNC350_052 | 66 | 91  | 25   | B |
| B73xNC350 | B73xNC350_053 | 72 | 115 | 43   | H |
| B73xNC350 | B73xNC350_055 | 78 | 109 | 31   | B |
| B73xNC350 | B73xNC350_056 | 50 | 82  | 32   | B |
| B73xNC350 | B73xNC350_057 | 60 | 115 | 55   | A |
| B73xNC350 | B73xNC350_058 | 60 | 92  | 32   | H |
| B73xNC350 | B73xNC350_059 | 67 | 106 | 39   | A |
| B73xNC350 | B73xNC350_061 | 75 | 122 | 47   | A |
| B73xNC350 | B73xNC350_062 | 60 | 108 | 48   | H |
| B73xNC350 | B73xNC350_063 | 62 | 100 | 38   | H |
| B73xNC350 | B73xNC350_064 | 59 | 86  | 27   | B |
| B73xNC350 | B73xNC350_066 | 75 | 135 | 60   | B |
| B73xNC350 | B73xNC350_067 | 90 | 112 | 22   | B |
| B73xNC350 | B73xNC350_068 | 68 | 112 | 44   | A |
| B73xNC350 | B73xNC350_069 | 80 | 132 | 52   | H |
| B73xNC350 | B73xNC350_070 | 77 | 120 | 43   | A |
| B73xNC350 | B73xNC350_071 | 76 | 121 | 45   | H |
| B73xNC350 | B73xNC350_072 | 76 | 119 | 43   | B |
| B73xNC350 | B73xNC350_073 | 60 | 95  | 35   | H |
| B73xNC350 | B73xNC350_074 | 82 | 120 | 38   | B |
| B73xNC350 | B73xNC350_075 | 82 | 105 | 23   | B |
| B73xNC350 | B73xNC350_076 | 51 | 81  | 30   | B |
| B73xNC350 | B73xNC350_077 | 78 | 105 | 27   | B |
| B73xNC350 | B73xNC350_078 | 56 | 112 | 56   | H |
| B73xNC350 | B73xNC350_079 | 45 | 85  | 40   | A |
| B73xNC350 | B73xNC350_080 | 60 | 100 | 40   | A |
| B73xNC350 | B73xNC350_081 | 58 | 102 | 44   | A |
| B73xNC350 | B73xNC350_082 | 70 | 125 | 55   | H |
| B73xNC350 | B73xNC350_083 | 52 | 95  | 43   | H |
| B73xNC350 | B73xNC350_084 | 85 | 125 | 40   | H |
| B73xNC350 | B73xNC350_085 | 56 | 82  | 26   | B |
| B73xNC350 | B73xNC350_086 | 74 | 115 | 41   | H |
| B73xNC350 | B73xNC350_087 | 55 | 100 | 45   | H |
| B73xNC350 | B73xNC350_089 | 66 | 125 | 59   | B |
| B73xNC350 | B73xNC350_090 | 46 | 97  | 51   | H |
| B73xNC350 | B73xNC350_091 | 45 | 82  | 37   | H |
| B73xNC350 | B73xNC350_092 | 60 | 96  | 36   | A |
| B73xNC350 | B73xNC350_093 | 56 | 105 | 49   | A |
| B73xNC350 | B73xNC350_095 | 68 | 85  | 17   | H |
| B73xNC350 | B73xNC350_096 | 73 | 135 | 62   | A |
| B73xNC350 | B73xNC350_097 | 70 | 113 | 43   | A |
| B73xNC350 | B73xNC350_098 | 84 | 125 | 41   | H |
| B73xNC350 | B73xNC350_099 | 65 | 128 | 63   | B |
| B73xNC350 | B73xNC350_100 | 77 | 106 | 29   | H |
| B73xNC350 | B73xNC350_101 | 68 | 134 | 66   | H |
| B73xNC350 | B73xNC350_102 | 70 | 125 | 55 B | H |
| B73xNC350 | B73xNC350_103 | 50 | 107 | 57 H | B |
| B73xNC350 | B73xNC350_104 | 71 | 119 | 48 H | A |
| B73xNC350 | B73xNC350_106 | 75 | 122 | 47 A | H |

|           |               |    |     |     |   |   |
|-----------|---------------|----|-----|-----|---|---|
| B73xNC350 | B73xNC350_108 | 76 | 121 | 45  | B | H |
| B73xNC350 | B73xNC350_109 | 75 | 127 | 52  | B | B |
| B73xNC350 | B73xNC350_111 | 73 | 113 | 40  | H | A |
| B73xNC350 | B73xNC350_112 | 64 | 117 | 53  |   | A |
| B73xNC350 | B73xNC350_114 | 71 | 122 | 51  | A | H |
| B73xNC350 | B73xNC350_115 | 90 | 115 | 25  | H | B |
| B73xNC350 | B73xNC350_117 | 76 | 142 | 66  | H | A |
| B73xNC350 | B73xNC350_119 | 68 | 99  | 31  | H | B |
| B73xNC350 | B73xNC350_120 | 83 | 116 | 33  | H |   |
| B73xNC350 | B73xNC350_121 | 65 | 113 | 48  | H | A |
| B73xNC350 | B73xNC350_122 | 54 | 119 | 65  | H | A |
| B73xNC350 | B73xNC350_123 | 82 | 120 | 38  | A | B |
| B73xNC350 | B73xNC350_124 | 65 | 113 | 48  | A |   |
| B73xNC350 | B73xNC350_125 | 74 | 115 | 41  | B | H |
| B73xNC350 | B73xNC350_126 | 69 | 115 | 46  | A |   |
| B73xNC350 | B73xNC350_127 | 66 | 167 | 101 | H | A |
| B73xNC350 | B73xNC350_133 | 74 | 152 | 78  | H | H |
| B73xNC350 | B73xNC350_134 | 81 | 113 | 32  | H | B |
| B73xNC350 | B73xNC350_135 | 75 | 120 | 45  | B | B |
| B73xNC350 | B73xNC350_136 | 35 | 98  | 63  | B |   |
| B73xNC350 | B73xNC350_137 | 72 | 110 | 38  | A | B |
| B73xNC350 | B73xNC350_138 | 90 | 155 | 65  | H |   |
| B73xNC350 | B73xNC350_139 | 51 | 122 | 71  | H |   |
| B73xNC350 | B73xNC350_140 | 76 | 125 | 49  | B | H |
| B73xNC350 | B73xNC350_141 | 62 | 105 | 43  | B |   |
| B73xNC350 | B73xNC350_142 | 71 | 128 | 57  | B |   |
| B73xNC350 | B73xNC350_143 | 56 | 102 | 46  | H |   |
| B73xNC350 | B73xNC350_144 | 70 | 113 | 43  | H | A |
| B73xNC350 | B73xNC350_145 | 80 | 113 | 33  | H |   |
| B73xNC350 | B73xNC350_146 | 75 | 125 | 50  | H |   |
| B73xNC350 | B73xNC350_147 | 77 | 130 | 53  | B |   |
| B73xNC350 | B73xNC350_148 | 74 | 125 | 51  | H |   |
| B73xNC350 | B73xNC350_150 | 55 | 115 | 60  | H |   |
| B73xNC350 | B73xNC350_152 | 56 | 77  | 21  | H |   |
| B73xNC350 | B73xNC350_153 | 85 | 157 | 72  | B |   |
| B73xNC350 | B73xNC350_154 | 80 | 123 | 43  | B |   |
| B73xNC350 | B73xNC350_155 | 64 | 122 | 58  | H |   |
| B73xNC350 | B73xNC350_157 | 87 | 125 | 38  | H |   |
| B73xNC350 | B73xNC350_158 | 75 | 115 | 40  | H |   |
| B73xNC350 | B73xNC350_159 | 78 | 141 | 63  | B |   |
| B73xNC350 | B73xNC350_160 | 60 | 135 | 75  | H | H |
| B73xNC350 | B73xNC350_161 | 42 | 105 | 63  | H |   |
| B73xNC350 | B73xNC350_162 | 42 | 90  | 48  | A |   |
| B73xNC350 | B73xNC350_163 | 60 | 105 | 45  | A |   |
| B73xNC350 | B73xNC350_164 | 46 | 92  | 46  | H |   |
| B73xNC350 | B73xNC350_166 | 52 | 82  | 30  | B |   |
| B73xNC350 | B73xNC350_167 | 88 | 130 | 42  | H | A |
| B73xNC350 | B73xNC350_168 | 57 | 109 | 52  | H |   |
| B73xNC350 | B73xNC350_169 | 88 | 160 | 72  | A | H |
| B73xNC350 | B73xNC350_170 | 69 | 130 | 61  | H | B |
| B73xNC350 | B73xNC350_172 | 78 | 125 | 47  | H |   |
| B73xNC350 | B73xNC350_173 | 70 | 127 | 57  | H |   |
| B73xNC350 | B73xNC350_174 | 63 | 120 | 57  | H | H |



|           |               |    |     |    |   |   |
|-----------|---------------|----|-----|----|---|---|
| B73xNC350 | B73xNC350_175 | 76 | 101 | 25 | A |   |
| B73xNC350 | B73xNC350_176 | 76 | 120 | 44 | A |   |
| B73xNC350 | B73xNC350_178 | 78 | 115 | 37 |   | H |
| B73xNC350 | B73xNC350_179 | 67 | 110 | 43 | H |   |
| B73xNC350 | B73xNC350_180 | 70 | 105 | 35 | H |   |
| B73xNC350 | B73xNC350_181 | 66 | 128 | 62 | H | H |
| B73xNC350 | B73xNC350_183 | 71 | 115 | 44 | B | H |
| B73xNC350 | B73xNC350_184 | 90 | 147 | 57 | H | H |
| B73xNC350 | B73xNC350_185 | 80 | 115 | 35 | B | H |
| B73xNC350 | B73xNC350_186 | 63 | 100 | 37 | H | H |
| B73xNC350 | B73xNC350_188 | 65 | 103 | 38 | H |   |
| B73xNC350 | B73xNC350_189 | 63 | 102 | 39 |   | A |
| B73xNC350 | B73xNC350_190 | 64 | 93  | 29 |   | B |
| B73xNC350 | B73xNC350_191 | 32 | 84  | 52 | H | H |
| B73xNC350 | B73xNC350_192 | 75 | 128 | 53 | H | H |
| B73xNC350 | B73xNC350_193 | 68 | 120 | 52 | A | B |
| B73xNC350 | B73xNC350_194 | 56 | 90  | 34 | H | B |
| B73xNC350 | B73xNC350_195 | 75 | 130 | 55 | B |   |
| B73xNC350 | B73xNC350_196 | 78 | 132 | 54 | B |   |
| B73xNC350 | B73xNC350_197 | 80 | 132 | 52 |   | A |
| B73xNC350 | B73xNC350_198 | 70 | 135 | 65 | H | B |
| B73xNC350 | B73xNC350_199 | 10 | 42  | 32 | A | B |
| B73xNC350 | B73xNC350_200 | 57 | 110 | 53 | H |   |
| B73xNC350 | B73xNC350_201 | 71 | 94  | 23 | A | B |
