# Supplementary material for: Association and Linkage Analysis of Aluminum Tolerance Genes in Maize
Source: PubMed Central journal article supplement (PMC2848604; doi:10.1371/journal.pone.0009958), 2010-04-01
Supplement: pone.0009958.s005.pdf [file pone.0009958.s005.pdf]

| <u>Gene abbreviation</u> | <u>MAGI designation</u> | <u>Gene name</u>         | <u>Primer Name</u>           | <u>Primer Sequence</u>                          | <u>Indel used as polymorphism</u> |
|--------------------------|-------------------------|--------------------------|------------------------------|-------------------------------------------------|-----------------------------------|
| PME                      | 4.0_158804              | Pectin<br>Methylesterase | mzb00202_F<br>mzb00202_R     | CCGGAAGTCCACATCAGAAT<br>GATGCTTGGATAAAAACAAATCG | In 3rd exon                       |
| ME                       | 3.1_47445               | Malic Enzyme             | mzb00198_F<br>mzb00198_R     | ACACACACCACCTTTCCACA<br>ACGGTGACGCGGATTTATAG    | Site #1                           |
| ASL                      | 3.1_41691               | ZmASL1                   | MateF2_F1<br>MateF2_R1       | GACCCCATTATTCCTGCTGA<br>AAACAGAAAGGATGCCGTTG    | Site #47                          |
| SAHH                     | 4.0_116767              | SAH hydrolase            | ADHCF2_F1<br>ADHCF2_R1       | AACCTTGGGTGTGCTACTGG<br>CTTGGGGAGCACATACACCT    | In 1st intron                     |
| ISL                      | 4.0_124671              | Isocitrate Lyase         | mzb00203_F<br>mzb00204_R     | CGTGACCCGCTGACTATAAA<br>CTTCTCCTCCATGATCTGC     | In 2nd intron                     |
| AL2                      | 3.1_93496               | ZmALMT2                  | ALMT93496_F1<br>ALMT93496_R1 | TCAGACTACAAGGGTGTGG<br>CAGCAAAGGCTTCTGATACAA    | Site #11                          |
